# Supplementary material for: Intimate partner violence among reproductive-age women with chronic mental illness attending a psychiatry outpatient department: cross-sectional facility-based study, Addis Ababa, Ethiopia
Source: PubMed Central journal article supplement — BMJ Open. 2021 Dec 7;11(12):e045251. doi: 10.1136/bmjopen-2020-045251 (PMC8655586; doi:10.1136/bmjopen-2020-045251), 2021-12-07
Supplement: bmjopen-2020-045251.draft_revisions.pdf [file bmjopen-2020-045251.draft_revisions.pdf]

# BMJ Open

BMJ Open is committed to open peer review. As part of this commitment we make the peer review history of every article we publish publicly available.

When an article is published we post the peer reviewers' comments and the authors' responses online. We also post the versions of the paper that were used during peer review. These are the versions that the peer review comments apply to.

The versions of the paper that follow are the versions that were submitted during the peer review process. They are not the versions of record or the final published versions. They should not be cited or distributed as the published version of this manuscript.

BMJ Open is an open access journal and the full, final, typeset and author-corrected version of record of the manuscript is available on our site with no access controls, subscription charges or pay-per-view fees (<http://bmjopen.bmj.com>).

If you have any questions on BMJ Open's open peer review process please email [info.bmjopen@bmj.com](mailto:info.bmjopen@bmj.com)

# BMJ Open

**Prevalence of intimate partner violence among reproductive age women with severe mental illness: A cross-sectional study in Addis Ababa, Ethiopia**

|                               |                                                                                                                                                                                                                                                                                                                                                                                                            |
|-------------------------------|------------------------------------------------------------------------------------------------------------------------------------------------------------------------------------------------------------------------------------------------------------------------------------------------------------------------------------------------------------------------------------------------------------|
| Journal:                      | <i>BMJ Open</i>                                                                                                                                                                                                                                                                                                                                                                                            |
| Manuscript ID                 | bmjopen-2020-045251                                                                                                                                                                                                                                                                                                                                                                                        |
| Article Type:                 | Original research                                                                                                                                                                                                                                                                                                                                                                                          |
| Date Submitted by the Author: | 25-Sep-2020                                                                                                                                                                                                                                                                                                                                                                                                |
| Complete List of Authors:     | Zerihun, Tigist; St Paul's Hospital Millennium Medical College, Psychiatry ; St Paul's Hospital Millennium Medical College, Psychiatry<br>Tesfaye, Markos; St Paul's Hospital Millennium Medical College, Psychiatry<br>Deyessa, Negussie; Addis Ababa University College of Health Sciences, Public Health<br>Bekele, Delayehu ; St Paul's Hospital Millennium Medical College, Obstetrics and gynecology |
| Keywords:                     | Schizophrenia & psychotic disorders < PSYCHIATRY, PUBLIC HEALTH, Reproductive medicine < GYNAECOLOGY                                                                                                                                                                                                                                                                                                       |
|                               |                                                                                                                                                                                                                                                                                                                                                                                                            |

SCHOLARONE™  
Manuscripts

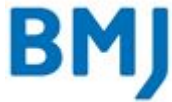

I, the Submitting Author has the right to grant and does grant on behalf of all authors of the Work (as defined in the below author licence), an exclusive licence and/or a non-exclusive licence for contributions from authors who are: i) UK Crown employees; ii) where BMJ has agreed a CC-BY licence shall apply, and/or iii) in accordance with the terms applicable for US Federal Government officers or employees acting as part of their official duties; on a worldwide, perpetual, irrevocable, royalty-free basis to BMJ Publishing Group Ltd ("BMJ") its licensees and where the relevant Journal is co-owned by BMJ to the co-owners of the Journal, to publish the Work in this journal and any other BMJ products and to exploit all rights, as set out in our [licence](#).

The Submitting Author accepts and understands that any supply made under these terms is made by BMJ to the Submitting Author unless you are acting as an employee on behalf of your employer or a postgraduate student of an affiliated institution which is paying any applicable article publishing charge ("APC") for Open Access articles. Where the Submitting Author wishes to make the Work available on an Open Access basis (and intends to pay the relevant APC), the terms of reuse of such Open Access shall be governed by a Creative Commons licence – details of these licences and which [Creative Commons](#) licence will apply to this Work are set out in our licence referred to above.

Other than as permitted in any relevant BMJ Author's Self Archiving Policies, I confirm this Work has not been accepted for publication elsewhere, is not being considered for publication elsewhere and does not duplicate material already published. I confirm all authors consent to publication of this Work and authorise the granting of this licence.

1  
2  
3  
4  
5  
6  
7  
8  
9  
10  
11  
12  
13  
14  
15  
16  
17  
18  
19  
20  
21  
22  
23  
24  
25  
26  
27  
28  
29  
30  
31  
32  
33  
34  
35  
36  
37  
38  
39  
40  
41  
42  
43  
44  
45  
46  
47  
48  
49  
50  
51  
52  
53  
54  
55  
56  
57  
58  
59  
60

## Prevalence of intimate partner violence among reproductive age women with severe mental illness: A cross-sectional study in Addis Ababa, Ethiopia

Tigist Zerihun<sup>1\*</sup>, Markos Tesfaye<sup>1</sup>, Negussie Deyessa<sup>2</sup>, Delayehu Bekele<sup>3</sup>

1. Department of Psychiatry, St Paul's Hospital Millennium Medical College, Addis Ababa, Ethiopia
2. Addis Ababa University, School of public health, Addis Ababa, Ethiopia
3. Department of obstetrics and gynecology, St Paul's Hospital Millennium Medical College, Addis Ababa, Ethiopia

### \*Corresponding Author

Tigist Zerihun\* (MD, MPHIL)

Email: [zerukaye@gmail.com](mailto:zerukaye@gmail.com); [tigsist.zerihun@sphmmc.edu.et](mailto:tigsist.zerihun@sphmmc.edu.et)

Prof Markos Tesfaye (MD, PHD)

Email: [markostesfaye92@gmail.com](mailto:markostesfaye92@gmail.com) ; [markos.tesfaye@sphmmc.edu.et](mailto:markos.tesfaye@sphmmc.edu.et)

Dr. Negussie Deyessa (MD, PHD)

Email: [negdaysun@gmail.com](mailto:negdaysun@gmail.com), [negussie.deyessa@aau.et](mailto:negussie.deyessa@aau.et)

Dr. Delayehu Bekele (MD, MPH)

Email: [delayehu@gmail.com](mailto:delayehu@gmail.com) , [delayehu.bekele@sphmmc.edu.et](mailto:delayehu.bekele@sphmmc.edu.et)

**Word count**      2597

## Abstract

**Objective:** To determine the prevalence of intimate partner violence (IPV) among reproductive age women attending psychiatric outpatient services and to identify associated factors.

**Design:** Cross-sectional facility-based study

**Setting:** Outpatient psychiatric clinics of public hospitals in Addis Ababa.

**Participants:** Reproductive age women with severe mental illness attending psychiatric outpatient clinics

**Primary and secondary outcome measures:** Data was collected by using a multi- culturally validated questionnaire from randomly sampled women with severe mental illness. Multiple logistic regression was done to identify factors independently associated with IPV. Ethical approval was obtained from the St. Paul's Hospital Millennium Medical College Institutional Review Board.

**Result:** Four hundred twenty-two participants who had follow up at the psychiatric outpatient clinics participated in the study. The lifetime prevalence of any form of IPV among participants was 62.0% (95% CI: 56.1, 68.8). The commonest form of IPV experienced by women was emotional violence [60%; 95% CI: 55.0, 64.7]. One hundred eighty-six [44.1%; (95% CI: 39.3, 48.8)] of respondents had experienced physical or sexual violence during the previous year. History of divorce and having a mental illness for more than five years were associated with any forms of IPV [AOR= 5.64; 95% CI: 2.75, 11.56] and [AOR= 2.23; 95%CI: 1.26, 3.93] respectively.

**Conclusion:** The high prevalence of IPV among women attending psychiatric outpatient services highlights the need to routinely inquire about IPV and develop effective strategies to prevent it among this vulnerable group.

**Keywords:** Intimate partner violence, Psychiatric outpatient, Mental illness

## Article summary

- There is scarce research on intimate partner violence among women with severe mental illness in Ethiopia and Africa at large.
- We used a multi-country setting validated standard questionnaire, which allows direct comparison of our findings with other available data.
- As a cross-sectional study, our data do not imply causality and temporality relationship between the variables.
- Data were self-reported, which may be limited by recall bias and underreporting; men were not investigated to understand the magnitude and reason for engaging in violence against their partners.
- The study was conducted among women thought to have better access to information, so the findings may not be generalizable to women with mental illness who do not attend psychiatric facilities.

## Introduction

Intimate partner violence (IPV) among women is a widespread phenomenon globally (1).

According to the WHO definition, IPV includes emotional abuse, physical or sexual violence between current and former partners (2). To date, research on IPV has predominantly focused on experiences of physical violence than the emotional and sexual aspects (3). One-third of the women in the globe experienced IPV at some point in their life (4).

Different studies reported considerable regional variation in the prevalence of IPV (5). In the World Health Organisation's multi-setting study on violence against women in intimate relationships, the prevalence ranged from 15% to 72.7% and 4%–54% in their lifetime and the past 12 months, respectively (6). In the same study, the lifetime prevalence of physical or sexual

1 violence against women reported to be lowest from Japan and highest from Ethiopia (6). Another  
2  
3 Ethiopian study has also reported a 30% prevalence among ever-married women (7). Different  
4  
5 factors may play a role in precipitating and maintaining IPV worldwide such as marital status,  
6  
7 education, wealth, cultural factors, mental health condition (7-10).  
8  
9

10  
11 IPV is associated with significant morbidity and mortality, especially among women, and its  
12  
13 prevention is a global public health priority(11, 12). Women experiencing IPV have more medical,  
14  
15 gynecologic, and stress-related symptoms than non-abused women(11, 13). Associations of IPV  
16  
17 with the poor mental and physical health of women have been demonstrated in the international and  
18  
19 national numerous studies (14).  
20  
21

22  
23 There is also strong evidence that women with severe or chronic mental illness experience higher  
24  
25 rates of violence than women in the general population (9). Also, IPV is a known risk factor for  
26  
27 mental health problems, including depression, post-traumatic stress disorder (PTSD) and suicide  
28  
29 attempts (15-17). In addition to being at higher risk of experiencing each type of IPV (emotional,  
30  
31 physical and sexual ), women with severe mental illness (SMI) such as schizophrenia, bipolar  
32  
33 disorder and severe major depression are less likely to protect themselves and seek help than their  
34  
35 counter partners without mental illness(12). History of IPV experience is associated with poorer  
36  
37 health, including post-traumatic stress disorder, depression, anxiety, and significant impairment in  
38  
39 functionality and somatic health (14, 15). Nevertheless, little is known about the prevalence of IPV  
40  
41 among reproductive age women with SMI living in low income settings.  
42  
43  
44  
45

46  
47 Addressing this evidence gap is essential in developing effective interventions in this vulnerable  
48  
49 group. Therefore, we aimed to examine the prevalence of IPV and associated factors among women  
50  
51 with SMI in Ethiopia.  
52  
53

## 54 **Methods**

55  
56  
57

## Study design and setting

The health facility-based cross-sectional study design was undertaken in Addis Ababa, the capital city of Ethiopia. The city has an estimated population of 3.2 million (18). The study was conducted from December 2016 to May 2017 in four outpatient clinics of public hospitals delivering mental health services by psychiatrists or psychiatric residents. The four hospitals are St. Paul's Hospital, Yekatit 12 Hospital, Zewditu Memorial Hospital and Amanuel Hospital.

## Sample Size Determination

The sample size for the study was calculated based on the following assumptions: the prevalence of IPV among women with SMI (Schizophrenia, bipolar disorder and severe major depression) ( $P=50\%$ ) taken to obtain the maximum sample size,  $Z = 1.96$  at 95% confidence level,  $d =$  the level of precision (0.05), and adding for non-response of 10 %; this gave a total required sample size of  $n= 422$ .

## Sampling procedure

In this study, a total of 422 study participants were enrolled. The study subjects were recruited randomly from psychiatric outpatient clinics of the four hospitals. All consenting women aged 18-49 years who presented in the study period were included. Critically ill women, women who were unable to respond to the interviews and who were not in relationship was excluded after assessment by experienced psychiatric nurses for their capacity to consent.



## **Data Collection Methods and instrument**

An interviewer-administered structured questionnaire was used to collect the data. Standardised pre-tested Amharic (National language of Ethiopia ) version of a multi-culturally validated World Health Organizations IPV tool was used to collect information relevant for measuring physical, sexual and emotional violence by an intimate partner (6). Sociodemographic characteristics and disease-related characteristics of the participants were also assessed. Women who had experienced IPV were further asked to qualify the type of experience and the timing, i.e. whether it was in the previous twelve months or not. Additionally, the questions on spousal control over the respondent were adopted and used to measure and categorise with different items referring to what a woman could without permission from her spouse/partner, including her healthcare-related activities.

The final Amharic version of the questionnaire was administered by trained and experienced female psychiatric nurses, with an emphasis on a respectful, non-judgemental approach and facilitating the women to be at ease. The participants were interviewed after they had completed their follow up visit as an exit interview.

Data quality was assured by designing a fully structured questionnaire which was pre-tested in twenty participants in different psychiatric outpatient clinics. Three days of training was given for supervisors and data collectors. The collected data were examined for completeness and internal consistency on the same day by supervisors.

## **Analysis**

The data were coded and entered using Epi Data version 3.1 and exported to the Statistical Package for Social Sciences (SPSS) version 20 to be cleaned and analysed. The sociodemographic characteristics and experience of IPV were summarized using descriptive statistics. In bivariate analysis, crude odds ratio and confidence intervals were calculated and used to select candidate

1 variables for multiple logistic regression analysis using a significance level of  $P < 0.05$ . Multivariable  
2  
3 logistic regression was used to obtain adjusted odds ratios and corresponding 95% confidence  
4  
5 interval (CIs).  
6  
7

## 8 **Ethical considerations**

10 Ethical approval was obtained from the institutional review board of Saint 'Paul's Hospital  
11  
12 Millennium Medical College. Written informed consent was obtained from each study participant  
13  
14 after informing them in detail about the study objectives, possible risks associated with the study,  
15  
16 and the benefits of the study. Participants were informed about their right to participate only on a  
17  
18 voluntary basis and to withdraw from the study without providing any explanation. The privacy of  
19  
20 the participants was ensured during the data collection and anonymity of the collected data during  
21  
22 analysis, interpretation and write up. Participants who needed any psychological support during the  
23  
24 data collection were referred for treatment and support.  
25  
26  
27  
28  
29  
30  
31  
32

## 33 **Results**

### 34 **Sociodemographic characteristics of respondents**

35  
36 A total of 422 women of reproductive age women were approached and participated giving a  
37  
38 response rate of 100%. The mean age of respondents was  $32.1 \pm 6.7$  years, with a range of 18 to 46.  
39  
40 One-third of the participants were not legally married (32.9%;  $n=139$ ). Four out of ten women were  
41  
42 either illiterate or had only primary level education. Only 27 % of women were employed. (Table  
43  
44 1). The majority (80%) of the participants had the diagnosis of mental illness for more than one  
45  
46 year. A significant proportion of the participants 46.3%,  $n=156$  lived with the illness for more than  
47  
48 5 years.  
49  
50  
51  
52  
53  
54  
55  
56  
57  
58  
59  
60

**Table 1. Demographic and clinical characteristics of (n=422)**

| Characteristics                        | Frequency | Percentage |
|----------------------------------------|-----------|------------|
| <25                                    | 63        | 14.9       |
| 25-34                                  | 186       | 44.1       |
| >35                                    | 173       | 41.0       |
| <b>Marital status</b>                  |           |            |
| Single                                 | 139       | 32.9       |
| Married                                | 187       | 44.3       |
| Widowed                                | 26        | 6.2        |
| Divorced                               | 70        | 16.6       |
| <b>Education</b>                       |           |            |
| Tertiary level                         | 60        | 14.2       |
| Secondary level (high school)          | 195       | 46.2       |
| Primary level                          | 123       | 29.2       |
| Illiterate                             | 44        | 10.4       |
| <b>Diagnosis</b>                       |           |            |
| Schizophrenia                          | 170       | 40.3       |
| Bipolar disorder                       | 116       | 27.5       |
| Major depressive disorder              | 136       | 32.2       |
| <b>Psychotropic medication</b>         |           |            |
| Antipsychotics                         | 208       | 49.3       |
| Mood stabiliser                        | 67        | 15.9       |
| Antidepressant                         | 147       | 34.8       |
| <b>Duration of treatment in months</b> |           |            |
| 1-24                                   | 163       | 38.6       |
| 25-48                                  | 91        | 21.6       |
| 49 months and above                    | 168       | 39.8       |
| <b>Occupation</b>                      |           |            |
| No Job                                 | 160       | 37.9       |
| Housewives/students                    | 93        | 22.1       |
| House maid /Daily laborer              | 55        | 13.0       |
| Employed (Formal)                      | 114       | 27.0       |

## Prevalence of IPV

### Lifetime prevalence

In this study, the lifetime prevalence of IPV was 62.0% [95% CI: 56.1, 68.8]. The commonest form of IPV experienced by women was emotional abuse 60% [95% CI: 55.0, 64.7] while 38.6% [95% CI: 34.1, 43.6] of participants experienced some form of physical violence in their lifetime. Among those who reported physical violence, significant proportion 25.6% [95% CI: 21.6, 29.6] reported severe form of physical violence. The commonest form of severe physical violence was being beaten by fist on the face 21.8% [95% CI: 17.3, 25.6] followed by, 13% [95% CI: 9.7, 16.1] being kicked on different parts of their bodies. More than three percent of women who experienced physical violence reported loss of consciousness, incontinence, fracture, or bleeding. Only 2% of participants sought medical service for the incident. Moreover, 38% [95% CI: 28.7, 47.2] of women who had experienced severe physical violence reported that the incident occurred while they were pregnant.

Regarding sexual violence, nearly one third 31.3% [95% CI: 26.8, 36.0] of the study participants reported ever experiencing any form of sexual violence and 25.1% [95% CI: 20.9, 29.1] were compelled by their partner to have sex.

More than one-third of all respondents, 36.2%; [95% CI: 31.3, 41.0], had at least one pregnancy after they received the diagnosis of mental illness. Of these 58.1%; [95% CI: 53.1, 62.3] pregnancies were unintended and 53.9% [95% CI: 45.3, 63.3] of which ended up in induced abortion. In 29% [95% CI: 21.1, 35.9] of these pregnancies arising from forced sexual intercourse, the women resorted to induced abortion and terminated the pregnancy. Additionally, one out of three participants had sexual intercourse before age of 18 putting them at an increased risk of teenage pregnancy.

### **Twelve months of prevalence**

Among women who participated in this survey, 44.1 % [ 95% CI: 39.3, 48.8], 35.3 % [ 95% CI:31.0,40.3] and 25.1% [ 95% CI:21.3,29.9] reported to have experienced, physical and sexual violence within the 12 months preceding the interview, respectively. Of those who reported physical violence, 95% [ 95% CI:91.3,98.0] of them reported severe, i.e. being hit with a fist or object on the face. Two per cent of them were able to get treatment, and the other two percent spent a night in the hospital for the damage due to the physical attack by their male partner. There was no statistically significant difference in the prevalence of IPV among women by the psychiatric diagnosis.

### **Emotional violence and spousal control**

Almost 60 % of participants had experienced moderate 25.0% [95% CI:21.2,29.3] or severe 34.8% [95% CI:30.0,39.0] forms of emotional violence, and more than 92 % [95% CI:90.0,95.3] were partially or entirely restricted in what they could do, requiring permission from their spouse in their lifetime. More than 70 % [ 95% CI:67.1,95.3] of participants would not visit healthcare facilities for treatment without getting approval from their partner (Table 2).

**Table 2 Spousal control among participants**

| Types of spousal control                                                                        | Never N (%) | Yes N (%)  |
|-------------------------------------------------------------------------------------------------|-------------|------------|
| Have you ever been prohibited not to meet your friend by your partner?                          | 210 (49.8%) | 212(50.2%) |
| Does your partner make a restrict /limit limitation on your contact with your family?           | 234(55.5%)  | 188(44.5%) |
| Does your partner insist on knowing where you are all times; always want to know where you are? | 189(44.8%)  | 233(55.2%) |
| Does your partner ignore or treats you indifferently?                                           | 153(36.3%)  | 269(63.7%) |
| Does your partner become annoyed when you talk with other men?                                  | 113(26.8%)  | 309(73.2%) |
| Does, your partner often accuses you of being unfaithful?                                       | 148(35.1%)  | 274(64.9%) |
| Does your partner want to ask him permission when you go out from home?                         | 117(27.9%)  | 303(72.1%) |
| Does your partner want you to ask him permission before visiting health care service?           | 121(28.7%)  | 300(71.3%) |
| Does your partner force you not to express your feeling to other people?                        | 192(45.5%)  | 230(54.5%) |

### Factors associated with IPV

In the logistic regression model, marital status, occupation, duration of illness and spousal control were significantly associated with IPV (Table 3). The prevalence of physical and/or sexual violence was significantly higher among unemployed women [AOR=2.35; 95% CI, 1.23, 4.41], daily labourers or housemaids [AOR=3.33; 95% CI, 1.45, 7.61] compared to women who were employed. Moreover, the odds of IPV was higher among women with history of being divorced [AOR=4.97; 95% CI, 2.36, 10.45] and non-married women [AOR=3.56; 95% CI, 2.09, 6.04] compared to currently married women. The study also depicted that women who were diagnosed with mental illness more than 5 years ago were more likely to experience IPV compared to women

who are newly diagnosed [AOR=2.11; 95% CI, 1.17, 3.82]. However, the study did not find a difference in the experience of IPV by level of income or educational level (Table 3).

Table 3. **Factors Associated with Intimate Among Women with severe mental illness**

| Characteristics                | IPV       |           | COR (95% CI)     | AOR (95%CI)             |
|--------------------------------|-----------|-----------|------------------|-------------------------|
|                                | Yes N (%) | No N (%)  |                  |                         |
| Income                         |           |           |                  |                         |
| Yes                            | 165(67.6) | 79(32.4)  | 1.67(1.12,2.48)  | 1.08(0.64,1.82)         |
| No                             | 99(55.6)  | 79(44.4)  | 1                | 1                       |
| Occupation                     |           |           |                  |                         |
| Unemployed                     | 117(73.1) | 43(26.9)  | 2.63(1.58,4.36)  | <b>2.35(1.23,4.41)</b>  |
| House wives/Student            | 46(49.5)  | 47(50.5)  | 0.94(0.55,1.63)  | 1.49(0.77,2.88)         |
| Daily labourer /<br>House maid | 43(78.2)  | 12(21.8)  | 3.46(1.65,7.24)  | <b>3.33(1.45, 7.61)</b> |
| Formal employment              | 58(50.9)  | 56(49.1)  | 1                | 1                       |
| Marital status                 |           |           |                  |                         |
| Married                        | 83(44.4)  | 104(55.6) | 1                | 1                       |
| Divorced                       | 59(84.3)  | 11(15.7)  | 6.72(3.32,13.60) | <b>4.97(2.36,10.45)</b> |
| Widowed                        | 16(61.5)  | 10(38.5)  | 2.05(0.86,4.64)  | 1.74(0.72,4.19)         |
| Single                         | 106(76.3) | 33(23.7)  | 4.03(2.48,6.54)  | <b>3.56(2.09, 6.04)</b> |
| Education                      |           |           |                  |                         |
| Beyond High school             | 35(58.3)  | 25(41.7)  | 1                | 1                       |
| High school                    | 124(63.6) | 71(36.4)  | 1.25(0.69,2.25)  | 0.96(0.49,1.86)         |
| Elementary                     | 76(61.3)  | 48(38.7)  | 1.13(0.60,2.12)  | 0.86(0.40,1.83)         |
| Illiterates                    | 29(67.4)  | 14(32.6)  | 1.48(0.65,3.36)  | 1.38(0.54,3.56)         |
| Duration of illness            |           |           |                  |                         |
| Less than 1 yr.                | 41(48.2)  | 44(51.8)  | 1                | 1                       |
| 1 – 5 yrs                      | 87(58.4)  | 62(41.6)  | 1.50(0.88,2.57)  | 1.25(0.69,2.26)         |
| >5yrs.                         | 136(72.3) | 52(27.7)  | 2.81(1.649,4.78) | <b>2.11(1.17, 3.82)</b> |

## Discussion

Despite high prevalence reports of IPV in community-based studies in Ethiopia, there is no study which focused on women with severe mental illness. In this study, we found a high prevalence of lifetime and recent IPV in this vulnerable group of population.

1 A substantial proportion (62%) of women reported IPV in their life time, which happened relatively  
2 frequently, suggesting that this is a common experience among women with severe mental illness.  
3  
4 This finding is similar with the study from rural Ethiopia which reported 60.7% violent against  
5  
6 people with SMI(19).Likewise the finding of IPV in this study is as high as the WHO community  
7  
8 prevalence study report from Ethiopia which is 72% (20) and Tanzanian study (61%) (21) but  
9  
10 higher than the community study in northern Ethiopia (22) and a report from systematic review  
11  
12 which is 33% IPV among women with SMI attending outpatient clinic(23) The difference can be  
13  
14 explained by study population differences as the participants of the northern Ethiopian study were  
15  
16 women in the rural community while our study participants were urban residents and higher  
17  
18 educational level. This study also reported (44%) recent intimate partner violence which is higher  
19  
20 than studies from high income countries such as 21% of past twelve month IPV reported from  
21  
22 UK(24) and 30.3 % in Spain(25).This is consistent with the assertion that that women with SMI  
23  
24 constitute a vulnerable segment of the population who need special protection (9) and the need that  
25  
26 health professionals should enquire about all types of recent IPV, among women with SMI.  
27  
28  
29 Generally, our finding is consistent with reports from other sub-Saharan African countries (15). As  
30  
31 these studies indicated, IPV is common social, public health and human rights concerns among  
32  
33 women with severe mental illness (26).  
34  
35  
36  
37  
38  
39  
40  
41  
42  
43

44 We also found a high prevalence of physical violence in this study (38.5%) which is comparable  
45  
46 with other results from some African countries (26) and Asian such as India and Vietnam (27) and  
47  
48 lower than rural Ethiopian finding (20). Our findings may reflect underreporting of IPV by this  
49  
50 vulnerable group who might be more dependent on their partners for support towards the care of  
51  
52 their mental illness. This is a crucial psychosocial issue with detrimental effects on the course of the  
53  
54  
55  
56  
57



1 pre-existing mental illness hence contributing to gender disparities in the treatment outcomes of  
2  
3 SMI  
4

5  
6 Despite a significant number of participants who reported physical violence in this study, only a  
7  
8 small proportion sought health care for their injuries. This is consistent with the low level of health-  
9  
10 seeking behaviour for IPV related injuries as reported by other studies in Ethiopia and other global  
11  
12 studies (5, 28, 29). Varying degree of emotional violence also reported in 60% of participants,  
13  
14 which is consistent with findings from Tanzania (21). It also has a significant association with poor  
15  
16 mental health as reported by other African countries (21, 30, 31). In this study, we found that both  
17  
18 violence and spousal control are common social, public health and human rights concerns among  
19  
20 women with SMI. We found that physical violence was associated with other types of violence; this  
21  
22 is consistent with research has shown that physical violence is often associated with psychological  
23  
24 or and sexual coercion. Mental health care providers need to routinely inquire about IPV during  
25  
26 outpatient visits so that appropriate interventions can be offered. Our study did not find an  
27  
28 association between women's education and IPV which in contrast to is to the study from east  
29  
30 Africa (26).  
31  
32  
33  
34  
35  
36

### 37 **Strength and limitations**

38  
39 Despite the weaknesses of this research; which included being hospital-based study, purely urban  
40  
41 sample and cultural bias of reporting, we have attempted to minimise non-disclosure and discomfort  
42  
43 by having female experienced psychiatric nurses for interviewing the participants. This study has  
44  
45 strengths which include the use of a standardised multiculturally validated tool questionnaire which  
46  
47 allow comparison of the findings from different parts of the globe. We believe that the findings of  
48  
49 the current study will help other researchers to further investigate the observed relationships  
50  
51 through longitudinal studies with larger samples and the impact of these experience in the prognosis  
52  
53  
54  
55  
56  
57

1 of their mental illness. To reduce the burden of mental illness, continued research is recommended  
2  
3 for evaluating IPV preventive strategies. IPV was found to be associated with employment status,  
4  
5 however, causality cannot be determined due to the cross-sectional study. Further studies are  
6  
7 needed to develop interventions aimed at reducing IPV among women with SMI and test their  
8  
9 effectiveness. Although the participation was optional, no woman refused to participate in this study  
10  
11 adds to the strengths of our findings.  
12  
13  
14  
15  
16  
17  
18  
19

## 20 **Conclusions**

21  
22 Intimate partner violence was found to be highly prevalent among women with severe mental  
23  
24 illness in Ethiopia. Given the detrimental effect of IPV on mental health, it may contribute to  
25  
26 disparities in the outcomes of women with SMI. IPV is more prevalent among the unemployed and  
27  
28 those with a longer duration of mental illness.  
29  
30  
31

32 Psychiatric outpatient clinics are important point of contact for women with mental illness who are  
33  
34 experiencing IPV. The treatment for mental disorders needs to include effective packages of  
35  
36 interventions for women who are also victims of IPV. Mental health professionals play a key role in  
37  
38 addressing IPV in this population.  
39  
40  
41

## 42 **Acknowledgments**

43  
44 We wish to thank all study participants and data collectors for their time and commitment to the  
45  
46 study.  
47  
48  
49

## 50 **Author Contributors**

1 We declare that all authors have made substantial contributions. TZ, MT, ND and DB conceptualize  
2  
3 conceived the study, developed the design. TZ and ND collected and managed data. TZ, ND and DB  
4  
5 performed the preliminary data analysis. TZ and MT performed the final data analysis. All authors  
6  
7 contributed to interpretation of results. TZ drafted the manuscript and all authors contributed to  
8  
9 critical revisions of the manuscript. All authors read and approved the final manuscript.  
10  
11  
12  
13

14 **Funding:** This study was supported by St Paul's Hospital Millennium Medical College. Grant  
15  
16 number 001 /2016.  
17  
18

19 The funder had no role in study design, data collection and analysis, decision to publish, or  
20  
21 preparation of the manuscript.  
22  
23

24 **Competing interest,** the authors declare that they have no competing interests.  
25  
26

#### 27 **Data availability statement**

28  
29 The authors confirm that the availability of data. Dataset is not publicly available at this point  
30  
31 because it contains sensitive information. The data that support the findings of this study are  
32  
33 available from the corresponding author, [TZ], upon reasonable request.  
34  
35  
36

#### 37 **Consent for publication**

38  
39 Not applicable.  
40  
41  
42  
43  
44  
45  
46  
47  
48  
49  
50  
51  
52  
53  
54  
55  
56  
57

## Reference

1. Miller E, McCaw B. Intimate partner violence. *New England Journal of Medicine*. 2019;380(9):850-7.
2. Organization WH. Responding to intimate partner violence and sexual violence against women: WHO clinical and policy guidelines: World Health Organization; 2013.
3. Feder G, Ramsay J, Dunne D, Rose M, Arsene C, Norman R, et al. How far does screening women for domestic (partner) violence in different health-care settings meet criteria for a screening programme? Systematic reviews of nine UK National Screening Committee criteria. 2009.
4. García-Moreno C, Pallitto C, Devries K, Stöckl H, Watts C, Abrahams N. Global and regional estimates of violence against women: prevalence and health effects of intimate partner violence and non-partner sexual violence: World Health Organization; 2013.
5. Organization WH. Global and regional estimates of violence against women: prevalence and health effects of intimate partner violence and non-partner sexual violence: World Health Organization; 2013.
6. Garcia-Moreno C, Jansen HA, Ellsberg M, Heise L, Watts CH. Prevalence of intimate partner violence: findings from the WHO multi-country study on women's health and domestic violence. *The lancet*. 2006;368(9543):1260-9.
7. Chernet AG, Cherie KT. Prevalence of intimate partner violence against women and associated factors in Ethiopia. *BMC women's health*. 2020;20(1):22.
8. Dixon L, Graham-Kevan N. Understanding the nature and etiology of intimate partner violence and implications for practice and policy. *Clinical psychology review*. 2011;31(7):1145-55.
9. Du Mont J, Forte T. Intimate partner violence among women with mental health-related activity limitations: a Canadian population based study. *BMC public health*. 2014;14(1):51.
10. Patra P, Prakash J, Patra B, Khanna P. Intimate partner violence: Wounds are deeper. *Indian journal of psychiatry*. 2018;60(4):494.
11. Vos T, Astbury J, Piers L, Magnus A, Heenan M, Stanley L, et al. Measuring the impact of intimate partner violence on the health of women in Victoria, Australia. *Bulletin of the World Health Organization*. 2006;84:739-44.
12. Bosch J, Weaver TL, Arnold LD, Clark EM. The impact of intimate partner violence on women's physical health: Findings from the Missouri behavioral risk factor surveillance system. *Journal of interpersonal violence*. 2017;32(22):3402-19.
13. Bonomi AE, Thompson RS, Anderson M, Reid RJ, Carrell D, Dimer JA, et al. Intimate partner violence and women's physical, mental, and social functioning. *American journal of preventive medicine*. 2006;30(6):458-66.
14. Dillon G, Hussain R, Loxton D, Rahman S. Mental and physical health and intimate partner violence against women: A review of the literature. *International journal of family medicine*. 2013;2013.
15. Devries KM, Mak JY, Bacchus LJ, Child JC, Falder G, Petzold M, et al. Intimate partner violence and incident depressive symptoms and suicide attempts: a systematic review of longitudinal studies. *PLoS medicine*. 2013;10(5).
16. Coker AL, Davis KE, Arias I, Desai S, Sanderson M, Brandt HM, et al. Physical and mental health effects of intimate partner violence for men and women. *American journal of preventive medicine*. 2002;23(4):260-8.

17. Afifi TO, MacMillan H, Cox BJ, Asmundson GJ, Stein MB, Sareen J. Mental health correlates of intimate partner violence in marital relationships in a nationally representative sample of males and females. *Journal of interpersonal violence*. 2009;24(8):1398-417.
18. Division UNS. country profile | Ethiopia - UNdata 2016 [cited 2020 august 14]. Available from: <https://data.un.org/CountryProfile.aspx/Images/CountryProfile.aspx?crName=Ethiopia>.
19. Tsigebrhan R, Shibre T, Medhin G, Fekadu A, Hanlon C. Violence and violent victimization in people with severe mental illness in a rural low-income country setting: a comparative cross-sectional community study. *Schizophrenia research*. 2014;152(1):275-82.
20. Deyessa N, Berhane Y, Alem A, Ellsberg M, Emmelin M, Hogberg U, et al. Intimate partner violence and depression among women in rural Ethiopia: a cross-sectional study. *Clinical practice and epidemiology in mental health*. 2009;5(1):8.
21. Saidi Kapiga SH, Abdul Khalie Muhammad, Heidi Stöckl, Gerry Mshana, Ramadhan Hashim,, Christian Hansen SL, Charlotte Watts. Prevalence of intimate partner violence and abuse and associated factors among women enrolled into a cluster randomised trial in northwestern Tanzania *BMC public health*. 2017.
22. Tegbar Yigzaw AY, Yigzaw Kebede. Domestic violence around Gondar in Northwest Ethiopia *Ethiopian journal of Health development* 2004;18(3):133-9.
23. Oram S, Trevillion K, Feder G, Howard L. Prevalence of experiences of domestic violence among psychiatric patients: systematic review. *The British Journal of Psychiatry*. 2013;202(2):94-9.
24. Khalifeh H, Oram S, Trevillion K, Johnson S, Howard LM. Recent intimate partner violence among people with chronic mental illness: findings from a national cross-sectional survey. *The British Journal of Psychiatry*. 2015;207(3):207-12.
25. González Cases J, Polo Usaola C, González Aguado F, López Gironés M, Rullas Trincado M, Fernández Liria A. Prevalence and Characteristics of Intimate Partner Violence Against Women with Severe Mental Illness: A Prevalence Study in Spain. *Community Mental Health Journal*. 2014;50(7):841-7.
26. Ali AA, Yassin K, Omer R. Domestic violence against women in Eastern Sudan. *BMC public health*. 2014;14(1):1136.
27. Ali TS, Asad N, Mogren I, Krantz G. Intimate partner violence in urban Pakistan: prevalence, frequency, and risk factors. *International journal of women's health*. 2011;3:105.
28. McCleary-Sills J, Namy S, Nyoni J, Rweyemamu D, Salvatory A, Steven E. Stigma, shame and women's limited agency in help-seeking for intimate partner violence. *Global public health*. 2016;11(1-2):224-35.
29. Metheny N, Stephenson R. Help Seeking Behavior among Women Who Report Intimate Partner Violence in Afghanistan: an Analysis of the 2015 Afghanistan Demographic and Health Survey. *Journal of Family Violence*. 2019;34(2):69-79.
30. Stöckl H PB. Intimate partner violence and its association with physical and mental health symptoms among older women in Germany. *Journal of Interpersonal Violence*. 2015;30(30):89-111.
31. Trevillion K, Oram S, Feder G, Howard LM. Experiences of domestic violence and mental disorders: a systematic review and meta-analysis. *PloS one*. 2012;7(12).

1  
2  
3  
4  
5  
6  
7  
8  
9  
10  
11  
12  
13  
14  
15  
16  
17  
18  
19  
20  
21  
22  
23  
24  
25  
26  
27  
28  
29  
30  
31  
32  
33  
34  
35  
36  
37  
38  
39  
40  
41  
42  
43  
44  
45  
46  
47  
48  
49  
50  
51  
52  
53  
54  
55  
56  
57  
58  
59  
60

|                                                                         |  |
|-------------------------------------------------------------------------|--|
| <b>General Questions</b>                                                |  |
| 1. Code Number _____                                                    |  |
| 2. Date of interview        /        /                                  |  |
|                                                                         |  |
| 4. Result of the interview                                              |  |
| 4.1 Complete                                                            |  |
| 4.2 Incomplete                                                          |  |
| 4.3 Refused                                                             |  |
| 5. Checked by Investigator: Signature _____ Date: _____ / _____ / _____ |  |
| (Day/ Month/ Year)                                                      |  |

|                    |                                                                                                                                                                                                                                                                                                                                                                                                                                                                                                                                                                                                                                                                                                                                                                                                                                                                                                           |
|--------------------|-----------------------------------------------------------------------------------------------------------------------------------------------------------------------------------------------------------------------------------------------------------------------------------------------------------------------------------------------------------------------------------------------------------------------------------------------------------------------------------------------------------------------------------------------------------------------------------------------------------------------------------------------------------------------------------------------------------------------------------------------------------------------------------------------------------------------------------------------------------------------------------------------------------|
| <b>Interviewer</b> | <b>Interviewer: INTRODUCE YOURSELF TO THE CLIENT</b>                                                                                                                                                                                                                                                                                                                                                                                                                                                                                                                                                                                                                                                                                                                                                                                                                                                      |
|                    | <p>Hello, My name is ..... We are conducting a study to improve the availability and quality of family planning services for psychiatry clients. As part of this, I would like to ask you some questions about the services you have received. There is no risk if you agree to participate in the interview. All the information that you give to me will be kept strictly confidential; your name will not be used, and you will not be identified in any way. Your current and future care at this facility will not be affected in any way. This interview should take approximately 30 minutes to complete. Your participation is absolutely voluntary, and there is no penalty for refusing to take part. You are free to ask any questions; you may refuse to take part in the interview; you may refuse to answer any question in the interview, and you may stop the interview at any point.</p> |

|                    |                                                                                         |                                                                                                                                                                                                |                |
|--------------------|-----------------------------------------------------------------------------------------|------------------------------------------------------------------------------------------------------------------------------------------------------------------------------------------------|----------------|
|                    | _____<br>Interviewer's Signature<br>(Indicates Respondent's willingness to participate) | Date:<br>/ /                                                                                                                                                                                   |                |
| <b>Interviewer</b> | <b>PART I. Socio-demographic characteristics</b>                                        |                                                                                                                                                                                                | <b>SKIP TO</b> |
| 1.1                | How old are you?                                                                        | _____ Years<br>(age in completed years)                                                                                                                                                        |                |
| 1.2                | What is your religion?                                                                  | 1. Orthodox<br>2. Catholic<br>3. Muslim<br>4. Protestant<br>5. Other (specify)                                                                                                                 |                |
| 1.3                | What is the highest educational level you completed?                                    | 1. Tertiary education<br>2. High school<br>3. Primary education<br>4. Able to read and Write-<br>-----<br>5. Unable to read & Write<br>-----<br>6. No response -----<br>7. Other specify ----- |                |
| 1.4                | What ethnic group do you belong to?                                                     | 1. Oromo -----<br>2. Amhara-----<br>3. Somali-----<br>4. Tigre -----<br>5. Gurage -----<br>6. Other (specify) -----                                                                            |                |

|     |                                                     |                                                                                                                                                                                                                                                                                                                                                                                       |  |
|-----|-----------------------------------------------------|---------------------------------------------------------------------------------------------------------------------------------------------------------------------------------------------------------------------------------------------------------------------------------------------------------------------------------------------------------------------------------------|--|
| 1.5 | What is your current marital / relationship status? | <ol style="list-style-type: none"> <li>1. Married/cohabited -----</li> <li>2. Single, never married --<br/>-----</li> <li>3. Widowed -----</li> <li>4. Divorced -----</li> <li>5. Non-married partner ---<br/>--</li> <li>6. No response -----</li> </ol>                                                                                                                             |  |
| 1.6 | What is your total monthly income?                  | <ol style="list-style-type: none"> <li>1. Your own income-----<br/>---- Eth.Birr</li> <li>2. Husband's income-----<br/>---- Eth.Birr</li> <li>3. Other income sources<br/>____ Eth.Birr</li> <li>4. No income -----</li> <li>5. Don't know her own<br/>income</li> <li>6. Don't know her partner<br/>income</li> <li>7. No response -----</li> <li>8. Other (specify)-----</li> </ol> |  |



|      |                                                                             |                                                                                                                                                                                                                          |                       |
|------|-----------------------------------------------------------------------------|--------------------------------------------------------------------------------------------------------------------------------------------------------------------------------------------------------------------------|-----------------------|
| 1.7  | What is your current occupation?                                            | 1. Unemployed -----<br>2. Student -----<br>3. Housewife -----<br>4. House servant -----<br>5. Daily laborer -----<br>6. Merchant -----<br>7. Government employee<br>8. Private employee -----<br>9. Other (specify)----- |                       |
| 1.8  | How long ago did you know that you know you have a psychiatric illness?     | Years ----- and<br>Months -----                                                                                                                                                                                          |                       |
| 1.9  | For how long were having treatment and follow up at psychiatric clinic      | Years ----- and<br>Months -----                                                                                                                                                                                          |                       |
| 1.9. | What is your specific diagnosis?<br>(May be copied from the medical record) |                                                                                                                                                                                                                          |                       |
| 1.10 | Have you started taking any medication?                                     | 1. Yes-----<br>2. No-----                                                                                                                                                                                                | If No Skip to<br>1.12 |

|                                           |                                                                                                                             |                                                                     |             |
|-------------------------------------------|-----------------------------------------------------------------------------------------------------------------------------|---------------------------------------------------------------------|-------------|
| 1.11                                      | If you have started taking medications, what are the medications you are taking?<br>(May be copied from the medical record) |                                                                     |             |
| <b>Part II. Sexual history</b>            |                                                                                                                             |                                                                     |             |
| 2.1                                       | Have you ever had sexual intercourse?                                                                                       | 1. Yes-----<br>2. No-----<br>3. No response-----                    | Skip to 3.6 |
| 2.2                                       | If yes, at what age did you have sex for the first time?                                                                    | 1. _____ Years old<br>2. Don't remember-----<br>3. No response----- |             |
| 2.3                                       | Was your first sexual experience forced or you didn't want it                                                               | 1. Yes<br>2. No<br>3. No response                                   |             |
| 2.4                                       | Have you ever had sexual intercourse without your will?                                                                     | 1. Yes<br>2. No<br>3. No response                                   |             |
| 2.5                                       | Do you have a history of STIs?                                                                                              | 1. Yes.....<br>2. No .....<br>3. Don't Know                         |             |
| <b>PART III. Child desire information</b> |                                                                                                                             |                                                                     |             |
| 3.1.                                      | Have you ever been pregnant?                                                                                                | 1. Yes -----<br>2. No-----                                          | skip to 3.8 |
| 3.2.                                      | What is the total number of pregnancies did you have in the past?                                                           |                                                                     |             |

|                                                             |                                                                                         |                                                                                     |                                           |
|-------------------------------------------------------------|-----------------------------------------------------------------------------------------|-------------------------------------------------------------------------------------|-------------------------------------------|
| 3.3.                                                        | How many of the pregnancies were after you was diagnosed to have a psychiatric problem? |                                                                                     |                                           |
| 3.4.                                                        | Was your last pregnancy wanted/planned?                                                 | 1. Yes -----<br>2. No -----<br>3. Don't know -----                                  |                                           |
| 3.5.                                                        | Have you ever given birth?                                                              | 1. Yes-----<br>2. No-----                                                           | Skip to 3.8                               |
| 3.6.                                                        | Would you like to have children, or more children, in the future?                       | 1. Yes -----<br>2. No -----<br>3. Don't know -----<br>4. No response -----          | Skip to 4.1<br>Skip to 4.1<br>Skip to 4.1 |
| 3.7.                                                        | Have you ever had an unwanted pregnancy?                                                | 1. Yes.....<br>2. No .....<br>3. No response.....                                   |                                           |
| 3.8.                                                        | Have you ever had an induced abortion?                                                  | 1. Yes-----<br>2. No-----<br>3. No response-----                                    | If No Skip to 4.1                         |
| 3.9.                                                        | If yes, how many times?                                                                 | _____                                                                               |                                           |
| 3.10.                                                       | If yes to question yes 3.13 what was the reason?                                        | 1. It was unplanned pregnancy<br>2. Fear of teratogenicity from antipsychotic drugs |                                           |
| <b>PART V. Family planning use and fertility intentions</b> |                                                                                         |                                                                                     |                                           |

|      |                                                                                                      |                                                                                                                                                               |                                           |
|------|------------------------------------------------------------------------------------------------------|---------------------------------------------------------------------------------------------------------------------------------------------------------------|-------------------------------------------|
| 1.1. | Have you (or your partner) ever used a family planning method before?                                | 1. Yes -----<br>2. No -----<br>3. Don't remember -----<br>4. Don't know -----                                                                                 | Skip to 4.5<br>Skip to 4.5<br>Skip to 4.5 |
| 1.2. | Are you/your partner/ using a family planning method currently (during the study period)?            | 1. Yes -----<br>2. No -----<br>3. I don't know -----                                                                                                          | Skip to 4.5<br>Skip to 4.5                |
| 1.3. | If yes for question 5.3, specify the method you are using?<br>(More than one answer can be possible) | 1. Condom -----<br>2. Pill (OCP) -----<br>3. Injectable -----<br>4. IUD -----<br>5. Implants -----<br>6. Tubal ligation<br>/Vasectomy ---<br>7. Breastfeeding | After all<br>responses,<br>skip to 4.8    |

## Intimate partner violence Questionnaire

| F1.                                                                                                                                          |                                                                                                                   |                                                       |    | If YES, How often did this happen <b>in the last 12 months</b> : often, only sometimes or rarely. |                                                                                                                        |                                                                                                     |
|----------------------------------------------------------------------------------------------------------------------------------------------|-------------------------------------------------------------------------------------------------------------------|-------------------------------------------------------|----|---------------------------------------------------------------------------------------------------|------------------------------------------------------------------------------------------------------------------------|-----------------------------------------------------------------------------------------------------|
|                                                                                                                                              |                                                                                                                   | YES                                                   | NO | Often                                                                                             | Sometimes                                                                                                              | Rarely                                                                                              |
| Now, I'd like to ask you some questions about how your husband interacts with you. In the <b>last twelve months</b> , did your husband ever: |                                                                                                                   |                                                       |    |                                                                                                   |                                                                                                                        |                                                                                                     |
| a)                                                                                                                                           | Insulted you or made you feel bad about yourself                                                                  | a) 1. [ ] Yes<br>2. [ ] No                            |    | aa) 1. [ ] Often<br>2. [ ] Sometimes<br>3. [ ] Rarely                                             |                                                                                                                        |                                                                                                     |
| b)                                                                                                                                           | Belittled or humiliated you in front of other people?                                                             | b) 1. [ ] Yes<br>2. [ ] No                            |    | bb) 1. [ ] Often<br>2. [ ] Sometimes<br>3. [ ] Rarely                                             |                                                                                                                        |                                                                                                     |
| c)                                                                                                                                           | Do things to scare or intimidate you on purpose (eg by the way he looked at you, by yelling and smashing things)? | c) 1. [ ] Yes<br>2. [ ] No                            |    | cc) 1. [ ] Often<br>2. [ ] Sometimes<br>3. [ ] Rarely                                             |                                                                                                                        |                                                                                                     |
| d)                                                                                                                                           | Threatened to hurt you or someone you care about?                                                                 | d) 1. [ ] Yes<br>2. [ ] No                            |    | dd) 1. [ ] Often<br>2. [ ] Sometimes<br>3. [ ] Rarely                                             |                                                                                                                        |                                                                                                     |
| F2.                                                                                                                                          |                                                                                                                   | A. If Yes, continue with B. If NO, skip to next item. |    | B. Has this happened in the past 12 months? (If YES ask C only. If NO ask D only.)                | C. In the past 12 months would you say this has happened once, a few times, or many times? (After answering C, skip D) | D. Before the past 12 months would you say that this has happened once, a few times, or many times? |
| Has your your husband ever done any of the following things to you?                                                                          |                                                                                                                   |                                                       |    |                                                                                                   | One Few Many<br>1 2 3                                                                                                  | One Few Many<br>1 2 3                                                                               |
| a)                                                                                                                                           | Slapped you or thrown something at you that could hurt you?                                                       | a) 1. [ ] Yes<br>2. [ ] No                            |    | a) 1. [ ] Yes<br>2. [ ] No                                                                        | a) 1. [ ]<br>2. [ ]<br>3. [ ]                                                                                          | a) 1. [ ]<br>2. [ ]<br>3. [ ]                                                                       |
| b)                                                                                                                                           | Pushed you or shoved you?                                                                                         | b) 1. [ ] Yes<br>2. [ ] No                            |    | b) 1. [ ] Yes<br>2. [ ] No                                                                        | b) 1. [ ]<br>2. [ ]<br>3. [ ]                                                                                          | b) 1. [ ]<br>2. [ ]<br>3. [ ]                                                                       |
| c)                                                                                                                                           | Hit you with his fist or something that could hurt you?                                                           | c) 1. [ ] Yes<br>2. [ ] No                            |    | c) 1. [ ] Yes<br>2. [ ] No                                                                        | c) 1. [ ]<br>2. [ ]<br>3. [ ]                                                                                          | c) 1. [ ]<br>2. [ ]<br>3. [ ]                                                                       |
| d)                                                                                                                                           | Kicked you, dragged you or beaten you up?                                                                         | d) 1. [ ] Yes<br>2. [ ] No                            |    | d) 1. [ ] Yes<br>2. [ ] No                                                                        | d) 1. [ ]<br>2. [ ]<br>3. [ ]                                                                                          | d) 1. [ ]<br>2. [ ]<br>3. [ ]                                                                       |
| e)                                                                                                                                           |                                                                                                                   | e) 1. [ ] Yes<br>2. [ ] No                            |    | e) 1. [ ] Yes<br>2. [ ] No                                                                        | e) 1. [ ]<br>2. [ ]                                                                                                    | e) 1. [ ]<br>2. [ ]                                                                                 |

|  |                                                                                                          |                            |                            |                               |                               |
|--|----------------------------------------------------------------------------------------------------------|----------------------------|----------------------------|-------------------------------|-------------------------------|
|  |                                                                                                          |                            |                            | 3. [ ]                        | 3. [ ]                        |
|  | e) Choked or burnt you on purpose?                                                                       | f) 1. [ ] Yes<br>2. [ ] No | f) 1. [ ] Yes<br>2. [ ] No | f) 1. [ ]<br>2. [ ]<br>3. [ ] | f) 1. [ ]<br>2. [ ]<br>3. [ ] |
|  | f) Threatened to use or actually used a gun, knife or other weapon against you?                          | g) 1. [ ] Yes<br>2. [ ] No | g) 1. [ ] Yes<br>2. [ ] No | g) 1. [ ]<br>2. [ ]<br>3. [ ] | g) 1. [ ]<br>2. [ ]<br>3. [ ] |
|  | g) Physically force you to have sexual intercourse with him even when you did not want to?               | h) 1. [ ] Yes<br>2. [ ] No | h) 1. [ ] Yes<br>2. [ ] No | h) 1. [ ]<br>2. [ ]<br>3. [ ] | h) 1. [ ]<br>2. [ ]<br>3. [ ] |
|  | h) Force you to perform sexual acts you did not want to?                                                 | i) 1. [ ] Yes<br>2. [ ] No | i) 1. [ ] Yes<br>2. [ ] No | i) 1. [ ]<br>2. [ ]<br>3. [ ] | i) 1. [ ]<br>2. [ ]<br>3. [ ] |
|  | i) Did you ever have sexual intercourse because you were intimidated by him or afraid he would hurt you? |                            |                            |                               |                               |
|  | <b>Note: If the respondent reports no violence, SKIP TO F78.</b>                                         |                            |                            |                               |                               |

1  
2  
3  
4  
5  
6  
7  
8  
9  
10  
11  
12  
13  
14  
15  
16  
17  
18  
19  
20  
21  
22  
23  
24  
25  
26  
27  
28  
29  
30  
31  
32  
33  
34  
35  
36  
37  
38  
39  
40  
41  
42  
43  
44  
45  
46  
47  
48  
49  
50  
51  
52  
53  
54  
55  
56  
57  
58  
59  
60

|                                                                                           |
|-------------------------------------------------------------------------------------------|
| <b>ጠቅላላ ጥያቄዎች</b>                                                                         |
| <p>1. መለያ ቁጥር _____</p> <p>2. መጠይቁ ተደረገበት ቀን _____ / _____ / _____<br/>(ቀን/ ወር/ ዓ.ም.)</p> |
| <p>3. የመጠይቅ ሁኔታ</p> <p>3.1 የተሟላ</p> <p>3.2 ያልተሟላ</p> <p>3.3 ተቋውሞ</p> <p>3.4 ሌላ</p>        |
| <p>4. በተመራማሪው የተረጋገጠ.....ፊርማ.....ቀን: _____ / _____ / _____ (ቀን/ ወር/ ዓ.ም)</p>              |

|                   |                                                                                                                                                                                                                                                                                                                                                                                                                                                                                                                                                                                                                                                                                                                                                                                                                    |
|-------------------|--------------------------------------------------------------------------------------------------------------------------------------------------------------------------------------------------------------------------------------------------------------------------------------------------------------------------------------------------------------------------------------------------------------------------------------------------------------------------------------------------------------------------------------------------------------------------------------------------------------------------------------------------------------------------------------------------------------------------------------------------------------------------------------------------------------------|
| <b>መጠይቅ አድራጊው</b> | <b>ቃለ መጠይቅ አድራጊው እራሱን ስተሳታፊው ያስተዋውቁ</b>                                                                                                                                                                                                                                                                                                                                                                                                                                                                                                                                                                                                                                                                                                                                                                            |
|                   | <p>ጤና ይስጥልኝ ስሜ.....በአእምሮ ህክምና አገልግሎት ተጠቃሚዎች ላይ የቤተሰብ እቅድ አገልግሎት አጠቃቀም ላይ ምርምር እያደረግን ነው::ስለሆነም ስለአገኙት አገልግሎት አንዳንድ መጠይቆችን አደርግልዎታለሁ::u<sup>2</sup>=I ሆ"U ሃጃ'f ሽ&lt;ርf ሃጃ•`U ::u<sup>2</sup>=I ሆ"j "pf ጃT&gt;Öc&lt;f ማንኛውም መረጃ S[ I T&gt;eፀ^@'~ ጃ)Öuk "'&lt;:: S[ I " &lt; " Ä cUú" &lt;] ' ሃሽv u%EL SKÁ eKTÄ•[ " &lt; T&gt;eፀ^@ ÄJ" M T" — " &lt; U ጃ' P" T" f ጃT&gt;ሽMê S[ I uêG&lt;ፅ J" unM ሃጃ" xU::uተቋሙአሁን ወይም ወደፊት በሚያገኙት አገልግሎት ላይ ምንም ዓይነት ተፅዕኖ አይኖረውም:: ል' SÖÄp SS&lt;Lf cLd Ämn w%o ÄeፀMሽM:: u<sup>2</sup>=I ሆ"j " &lt;eፀ ጃT&gt;d)ፅf S&lt;K&lt; uS&lt;K&lt; uፀ'f ፅnÄ" f eKJ' uT" — " &lt; U " pf ሆ"~" TqU Ä&lt;LK&lt;:: S[ I ፀጃcÖ&lt; u=J" U ፀ" D"</p> <p>ስለጥናቱ ሊጠይቁኝ የሚፈልጉት ነገር ይኖራልን?</p> <p>አዎ የለም-----</p> <p>በጥናቱ ውስጥ ለመሳተፍ ፈቃደኛ ነዎት?</p> <p>አዎ የለም-----</p> <p>መልሱ የለም ከሆነ ፣አባክዎ አመሰግነው ያሰነብቱዋቸው</p> |
|                   | <p>በመጠይቅ አድራጊው የተረጋገጠ (ለመሳተፍ ፈቃደኛነቱን) _____ ፊርማ ቀን: _____ / _____ / _____<br/>(ቀን/ ወር/ ዓ.ም)</p>                                                                                                                                                                                                                                                                                                                                                                                                                                                                                                                                                                                                                                                                                                                    |

| በመጠይቅ አድራጊው | ክፍል አንድ Socio-demographic characteristics |                                                                                                                                                                                                                                                           | SKIP TO       |
|-------------|-------------------------------------------|-----------------------------------------------------------------------------------------------------------------------------------------------------------------------------------------------------------------------------------------------------------|---------------|
| 1.1         | እድሜዎ ስንት ነው?                              | _____ አመት በሙሉ ቁጥር ይቀመጥ                                                                                                                                                                                                                                    |               |
| 1.2         | GÃT•f- U"É" '“<                           | <ol style="list-style-type: none"> <li>1. *´,Êje i`e+Á”</li> <li>2. ካ,K=i</li> <li>3. ፕሮቲስታንት</li> <li>4. S&lt;eK=U</li> <li>5. K?L ÃÑKí</li> </ol>                                                                                                       |               |
| 1.3         | ከፍተኛ ጸገህዎ ለሆነው                            | <ol style="list-style-type: none"> <li>1. ሰላምተኛ ደረጃ(ከሃይስኩል በላይ)</li> <li>2. ሀላፊዎ ደረጃ /ሃይስኩል</li> <li>3. የመጀመሪያ ደረጃ</li> <li>4. ማኅበብ እና መገናኛ መቻል</li> <li>5. ማኅበብ እና መገናኛ ያለመቻል</li> <li>6. መልስ የለም</li> <li>7. አላውቅም</li> </ol>                           |               |
| 1.4         | የጋብቻ ሁኔታ                                  | <ol style="list-style-type: none"> <li>1. ልሽህ&lt;</li> <li>2. ጸገር/ጸገር /ጸገር</li> <li>3. ህጻን/ጸገር &lt; ጸገር/ጸገር &lt;</li> <li>4. ልሽህ&lt;</li> <li>5. ህጻን &lt; ጸገር &gt;•\ (IÒ© ÁMJ’ Òw%)</li> <li>6. መልስ አልተሰጠም</li> </ol>                                     |               |
| 1.5         | እጠቃላይ የወር ገቢዎ ምን ያህል ነው?                  | <ol style="list-style-type: none"> <li>1. የራስዎ ገቢ-----በር</li> <li>2. የባለቤትዎ ገቢ-----በር</li> <li>3. ሌላ የገቢ ምንጭ</li> <li>4. የራሱን ገቢ አላውቅም</li> <li>5. የባለቤቱን ገቢ አላውቅም</li> <li>6. ገቢ የለኝም-----</li> <li>7. መልስ የለም-----</li> <li>8. ሌላ(ይገለፅ)-----</li> </ol> |               |
| 1.6         | የስራ ሁኔታ?                                  | <ol style="list-style-type: none"> <li>1. ስራ የሌለው</li> <li>2. ተማሪ</li> <li>3. የሱት አመቤት</li> <li>4. የሱት ሰራተኛ</li> <li>5. የቀን ሰራተኛ</li> <li>6. ነጋዴ</li> <li>7. የመንግስት ተቀጣሪ የግል ድርጅት ሰራተኛ</li> <li>8. ሌላ (ይገለጽ)</li> </ol>                                   |               |
| 1.7         | የአእምሮ ህመም እንዳለብዎ ያወቁት መቼ ነው?              | _____ አመት እና-----ወርች                                                                                                                                                                                                                                      | በወራት ቁጥር ይቀመጥ |



|                                           |                                                           |                                                          |                   |
|-------------------------------------------|-----------------------------------------------------------|----------------------------------------------------------|-------------------|
| 1.8                                       | ለምን ያህል ጊዜ በአእምሮ ህመም ስህተትና ከትትል ቆይተዋል                     | ወሮች                                                      | በወራት ቁጥር ይቀመጥ     |
| 1.8                                       | ህመም ምን ዓይነት (ከካርድ ሊታይ ይችላል)?                              | -----                                                    |                   |
| 1.9                                       | መድኃኒት መውሰድ ጀምረዋል?                                         | 1. አዎ-----<br>2. የለም-----                                | If No Skip to 2.1 |
| 1.10                                      | መድኃኒት እየወሰዱ ከሆነ የሚወሰዱት መድኃኒቶች ምን ምን ናቸው? (ከካርድ ሊታይ ይችላል)? | -----                                                    |                   |
| <b>Part II. Sexual history</b>            |                                                           |                                                          |                   |
| 2.1                                       | ወሲብ አድርገው ያውቃሉ?                                           | 1. አዎ-----<br>2. የለም-----<br>3. መልስ የለም-----             | Skip to 3.6       |
| 2.2                                       | መልስዎ አዎ ከሆነ በየትኛው እድሜዎ ለላ ነው ለመጀመሪያ ጊዜ ያደረጉት?             | 1. _____ አመቴ ላይ<br>2. አላስታውሰውም<br>3. መልስ የለም-----        |                   |
| 2.3                                       | የመጀመሪያ የወሲብ ግንኙነት በግዳጅ ውይይት ሳይፈልጉ የሆነ ነበር?                | 1. አዎ-----<br>2. የለም-----<br>3. መልስ የለም-----             |                   |
| 2.4                                       | ከፍላጎት ውጪ ወሲብ አድርገው ያውቃሉ?                                  | 1. አዎ-----<br>2. የለም-----<br>3. መልስ የለም-----             |                   |
| 2.5                                       | የአባላዘር በሽታ ዘዎት ያውቃሉ?                                      | 1. አዎ-----<br>2. የለም-----<br>3. አላውቅም<br>4. መልስ የለም----- |                   |
| <b>PART III. Child desire information</b> |                                                           |                                                          |                   |
| 3.1.                                      | አርግዘው ሆነው ያውቃሉ?                                           | 1. አዎ-----<br>2. የለም-----                                | skip to 3.8       |
| 3.2.                                      | በአጠቃላይ ምን ያህል እረግዝና ነበርዎ/ሰነት ጊዜ አርግዘው ነበር?                | -----                                                    |                   |
| 3.3.                                      | ምን ያህል እረግዝናዎቹ ናቸው አእምሮ ህመም ስህተት ካወቁ በኋላ የነበሩት ?          | -----                                                    |                   |
| 3.4.                                      | የመጨረሻው እረግዝናዎ /የታቀደ /የተፈለገ ነበር?                           | 1. አዎ-----<br>2. የለም-----<br>3. መልስ የለም-----             |                   |
| 3.5.                                      | ልጅ ወልደው ያውቃሉ ?                                            | 1. አዎ-----<br>2. የለም-----                                | Skip to 3.8       |

|                                                             |                                                 |                                                                                                                                                                                               |                                                           |
|-------------------------------------------------------------|-------------------------------------------------|-----------------------------------------------------------------------------------------------------------------------------------------------------------------------------------------------|-----------------------------------------------------------|
| 3.6.                                                        | ወደፊት ልጅ መውለድ ወይም ተጨማሪ ልጆች ማግኘት ይፈልጋሉ?           | <ol style="list-style-type: none"> <li>1. አዎ-----</li> <li>2. የለም -----</li> <li>3. አላውቅም</li> <li>4. መልስ የለም -----</li> </ol>                                                                | <p>Skip to 3.11</p> <p>Skip to 4.1</p> <p>Skip to 4.1</p> |
| 3.7.                                                        | ያልተፈለገ እረግዝና ኖርዎት ያውቃል                          | <ol style="list-style-type: none"> <li>4. አዎ-----</li> <li>5. የለም -----</li> <li>6. መልስ የለም -----</li> </ol>                                                                                  |                                                           |
| 3.8.                                                        | እረግዝና አሰወርደው ያውቃሉ?                              | <ol style="list-style-type: none"> <li>1. አዎ-----</li> <li>2. የለም -----</li> <li>3. መልስ የለም -----</li> <li>4.</li> </ol>                                                                      | If No Skip to 4.1                                         |
| 3.9.                                                        | አዎ ከሆነ ስንት ጊዜ?                                  | _____                                                                                                                                                                                         |                                                           |
| 3.10.                                                       | ለጥያቄ 3.13 አዎ ከሆነም ከነዚህ ዎቻችን አንዱን ይጠቅሙ?          | <ol style="list-style-type: none"> <li>1. እረግዝናው ያልታቀደ ነበር</li> <li>2. ከመዳኒቱ የሚመጣውን ጉዳት በመፍራት</li> <li>3. እረግዝናው የተፈጠረው በግዳጅ /ያለፈቃድ በተፈጠመ ወሲብ ነው</li> <li>4. ሌላ(ይገለጹ)</li> </ol> <p>_____</p> |                                                           |
| <b>PART V. Family planning use and fertility intentions</b> |                                                 |                                                                                                                                                                                               |                                                           |
| 5.1.                                                        | እርስዎ ወይም የትዳር አጋርዎ የቤተሰብ እቅድ አገለግሎት ተጠቅመው ያውቃሉ? | <ol style="list-style-type: none"> <li>1. አዎ -----</li> <li>2. የለም -----</li> <li>3. አላስታውስም</li> </ol>                                                                                       | <p>Skip to 5.5</p> <p>Skip to 5.5</p>                     |

|             |                                                                              |                                                                                                                                                                                                                                                                                                                        |                                    |
|-------------|------------------------------------------------------------------------------|------------------------------------------------------------------------------------------------------------------------------------------------------------------------------------------------------------------------------------------------------------------------------------------------------------------------|------------------------------------|
| <p>5.2.</p> | <p>መልስዎ ለጥያቄ 5.1 አዎ ከሆነ አባክዎ ዘዴውን /አይነቱን ይነገሩን (ከአንድ መልስ በላይ መስጠት ይቻላል?)</p> | <ol style="list-style-type: none"> <li>1. ኮንዶም</li> <li>2. እንክብል/ኪነን</li> <li>3. መርፌ</li> <li>4. ሉፕ/በማህጸን የሚቀመጥ</li> <li>5. ኢምፕላንት /በከንድ የሚቀበር</li> <li>6. የማህጸን ቱቦ ማሰቃጠር/ማከላሸት</li> <li>7. ጡት ማጥባት</li> <li>8. ማቋረጥ/የዘርፍሬን ከውጪ ማፍሰስ</li> <li>9. ቀን ቆጥሮ የመጠቀም ዘዴ</li> <li>10. መልስ የለም</li> <li>11. ሌላ(ይገለፅ)</li> </ol> |                                    |
| <p>5.3.</p> | <p>እርስዎ ወይም የትዳር አጋርዎ የቤተሰብ አቅድ አገለግሎት አሁን በመጠቀም ላይ ናችሁ?(በጥናቱ ወቅት)</p>       | <ol style="list-style-type: none"> <li>1. አዎ -----</li> <li>2. የለም -----</li> <li>3. አላስታውስም</li> <li>4. መልስ የለም -----</li> </ol>                                                                                                                                                                                      | <p>Skip to 5.5<br/>Skip to 5.5</p> |
| <p>5.4.</p> | <p>መልስዎ ለጥያቄ 5.3 አዎ ከሆነ አባክዎ ዘዴውን /አይነቱን ይነገሩን (ከአንድ መልስ በላይ መስጠት ይቻላል?)</p> | <ol style="list-style-type: none"> <li>1. ኮንዶም</li> <li>2. እንክብል/ኪነን</li> <li>3. መርፌ</li> <li>4. ሉፕ/በማህጸን የሚቀመጥ</li> <li>5. ኢምፕላንት /በከንድ የሚቀበር</li> <li>6. የማህጸን ቱቦ ማሰቃጠር/ማከላሸት</li> <li>7. ጡት ማጥባት</li> <li>8. ማቋረጥ/የዘርፍሬን ከውጪ ማፍሰስ</li> <li>9. ቀን ቆጥሮ የመጠቀም ዘዴ</li> <li>10. መልስ የለም</li> <li>11. ሌላ(ይገለፅ)</li> </ol> |                                    |

**የመጠይቅ አድራጊው አስተያየት-----**

**እባክዎ ተሳታፊውን ስለ ተሳትፎአቸው እና ስለ ጊዜአቸው አመለካከት ያሰናብቱባቸው**

F56. በመቀጠል የምጠይቅ ለብዙ ሴቶች እውነት ስለሆኑ ሁኔታዎች ነው:: በአሁኑ ጊዜ ያለው ባለቤትዎ በማሰብ

1  
2  
3  
4  
5  
6  
7  
8  
9  
10  
11  
12  
13  
14  
15  
16  
17  
18  
19  
20  
21  
22  
23  
24  
25  
26  
27  
28  
29  
30  
31  
32  
33  
34  
35  
36  
37  
38  
39  
40  
41  
42  
43  
44  
45  
46  
47  
48  
49  
50  
51  
52  
53  
54  
55  
56  
57  
58  
59  
60

|                                                               |                            |
|---------------------------------------------------------------|----------------------------|
| ከዚህ በታች የተዘረዘሩት ሃሳቦች በአጠቃላይ የመልሱልኝ፡፡<br><b>ባለቤትዎ ..... :-</b> |                            |
| a) የራስዎን ጓደኛ እንዳያገኙ ለማድረግ ሙከራ ያደርጋሉ፡፡                         | a) 1. [ ] አዎን 2. [ ] አይደለም |
| b) ከወላጆቻቸው ወይም ከቤተሰብዎ ጋር ያለዎትን ግንኙነት ውስን እንዲሆን ያደርጋሉ፡፡        | b) 1. [ ] አዎን 2. [ ] አይደለም |
| c) ሁል ጊዜ የት እንዳሉ ማወቅ ይፈልጋሉ፡፡                                  | c) 1. [ ] አዎን 2. [ ] አይደለም |
| d) ቸል ይሎዎታል ለየት ባለ መልኩ አይንከባከብዎትም፡፡                           | d) 1. [ ] አዎን 2. [ ] አይደለም |
| e) ከሌላ ወንድ ጋር ቢያወጥ ወይም ቢያነጋግሩ ይበሳጫሉ፡፡                         | e) 1. [ ] አዎን 2. [ ] አይደለም |
| f) ብዙ ጊዜ ታማኝነትዎን ይጠራጠራሉ፡፡                                     | f) 1. [ ] አዎን 2. [ ] አይደለም |
| g) ከቤት ከመውጣትዎ በፊት እንዲያስፈቅዷቸው ይጠብቃሉ፡፡                          | g) 1. [ ] አዎን 2. [ ] አይደለም |
| h) ሕክምና ከማድረግዎ በፊት እንዲያስፈቅዷቸው ይጠብቃሉ፡፡                         | h) 1. [ ] አዎን 2. [ ] አይደለም |
| i) በአደባባይ ሃሳብዎን እንዳይገልፁ/ እንዳይናገሩ ይከለክልዎታል?                    | i) 1. [ ] አዎን 2. [ ] አይደለም |

|      |                                                                                     |                            |                                                        |
|------|-------------------------------------------------------------------------------------|----------------------------|--------------------------------------------------------|
| F57. | አሁን ባለፉት 12 ወራት ባለቤትዎ ከርሶ ጋር ስላለው ግንኙነት እጠይቁታለሁ፡፡<br><b>ባለፉት 12 ወራት ባለቤትዎ፡.....</b> |                            | መልስዎ አዎን ከሆነ፤ ባለፉት 12 ወራት ምን ያህል ጊዜ ተፈጠረ               |
|      | a) ሰድቦዎት ወይም ስለራስዎ መጥፎ ስሜት እንዲሰማዎ አድርጎዎታል?                                          | a) 1. [ ] አዎ<br>2. [ ] የለም | aa) 1. [ ] አልፎ አልፎ<br>2. [ ] አንዳንዴ/ብዙጊዜ<br>3. [ ] ሁልጊዜ |
|      | b) ሰዎች ፊት አሸማቆዎ፤ አዋርዶዎት ወይም አሳንሶዎት ያውቃሉ?                                            | b) 1. [ ] አዎ<br>2. [ ] የለም | bb) 1. [ ] አልፎ አልፎ<br>2. [ ] አንዳንዴ/ብዙጊዜ<br>3. [ ] ሁልጊዜ |
|      | c) እርስዎን ሆን ብለው አስፈራርቶዎ አዋርደዎ/ ዝቅተኝነት እንዲሰማዎት አድርገው ያውቃሉ?                           | c) 1. [ ] አዎ<br>2. [ ] የለም | cc) 1. [ ] አልፎ አልፎ<br>2. [ ] አንዳንዴ/ብዙጊዜ<br>3. [ ] ሁልጊዜ |
|      | d) እርስዎን ወይም የእርስዎ የሆነን ሰው ለመጉዳት አስፈራርተዎት ያውቃሉ?                                     | d) 1. [ ] አዎ<br>2. [ ] የለም | dd) 1. [ ] አልፎ አልፎ<br>2. [ ] አንዳንዴ/ብዙጊዜ<br>3. [ ] ሁልጊዜ |

|      |                                                                            |                                                                           |                                                                               |                                                                                                    |                                                                             |
|------|----------------------------------------------------------------------------|---------------------------------------------------------------------------|-------------------------------------------------------------------------------|----------------------------------------------------------------------------------------------------|-----------------------------------------------------------------------------|
| F58. | ባለቤትዎ ከዚህ በታች ከተዘረዘሩት መሃል ፈጽመውቦት ያውቃል?<br><br><b>በህይወት ዘመንዎ ባለቤትዎ.....</b> | A.<br>መልስዎ አዎን ከሆነ ወደ ጎን ይቀጥሉ<br><br>መልስዎ የለም ከሆነ ወደ ምኞት ገለጹ (ወደ ታች) ይታላፍ | B.<br>ይህ የሆነው ባለፉት 12 ወራት ነበር?<br><br>(አዎን ከሆነ Cን ብቻ ይጠይቁ የለም ከሆነ Dን ብቻ ይጠይቁ) | C.<br>ባለፉት 12 ወራት ይህ የሆነው ምን ያህል ጊዜ ነው?<br>1. አልፎ አልፎ<br>2. አንዳንዴ<br>3. ሁልጊዜ?<br>(C, ከመለሱ Dን ይታላፍ) | D.<br>ከ12 ወራት በፊት ባለው ጊዜ ይህ ምን ያህል ጊዜ ሆነ 1. አልፎ አልፎ<br>2. አንዳንዴ<br>3. ሁልጊዜ? |
|      | a) በጥፊ መተዎት ወይም የሚገቡዎት ነገር ወርውርቦት ያውቃሉ?                                    | a) 1. [ ] አዎ<br>2. [ ] የለም                                                | ab) 1. [ ] አዎ<br>2. [ ] የለም                                                   | ac) 1. [ ]<br>2. [ ]<br>3. [ ]                                                                     | ad) 1. [ ]<br>2. [ ]<br>3. [ ]                                              |
|      | b) ገፍትሮዎት ያውቃሉ ?                                                           | b) 1. [ ] አዎ<br>2. [ ] የለም                                                | bb) 1. [ ] አዎ<br>2. [ ] የለም                                                   | bc) 1. [ ]<br>2. [ ]<br>3. [ ]                                                                     | bd) 1. [ ]<br>2. [ ]<br>3. [ ]                                              |

|    |                                                                        |                                                                         |                            |                               |                               |
|----|------------------------------------------------------------------------|-------------------------------------------------------------------------|----------------------------|-------------------------------|-------------------------------|
| 1  | c) በቦክስ፤ በሌላ የሚገባ ነገር መቶዎት ወይም ደብዳቤዎት ያውቃሉ?                            | c) 1. [ ] አዎ<br>2. [ ] የለም                                              | cb)1. [ ] አዎ<br>2. [ ] የለም | cc)1. [ ]<br>2. [ ]<br>3. [ ] | cd)1. [ ]<br>2. [ ]<br>3. [ ] |
| 2  |                                                                        |                                                                         |                            |                               |                               |
| 3  |                                                                        |                                                                         |                            |                               |                               |
| 4  |                                                                        |                                                                         |                            |                               |                               |
| 5  | d) በእርግጫ ወይም በሌላ ነገር መቶዎት ወይም ጎትቶዎት ያውቃሉ?                              | d) 1. [ ] አዎ<br>2. [ ] የለም                                              | db)1. [ ] አዎ<br>2. [ ] የለም | dc)1. [ ]<br>2. [ ]<br>3. [ ] | dd)1. [ ]<br>2. [ ]<br>3. [ ] |
| 6  |                                                                        |                                                                         |                            |                               |                               |
| 7  |                                                                        |                                                                         |                            |                               |                               |
| 8  |                                                                        |                                                                         |                            |                               |                               |
| 9  |                                                                        |                                                                         |                            |                               |                               |
| 10 | e) ሆን ብለው አፍነዎት ወይም አቃጥሎዎት ያውቃሉ?                                       | e) 1. [ ] አዎ<br>2. [ ] የለም                                              | eb)1. [ ] አዎ<br>2. [ ] የለም | ec)1. [ ]<br>2. [ ]<br>3. [ ] | ed)1. [ ]<br>2. [ ]<br>3. [ ] |
| 11 |                                                                        |                                                                         |                            |                               |                               |
| 12 |                                                                        |                                                                         |                            |                               |                               |
| 13 |                                                                        |                                                                         |                            |                               |                               |
| 14 | f) በሽጉጥ፤ በጨቤ ወይም በሌላ መሳሪያ አስፈራርቶዎት ወይም ጎድቶዎት ያውቃሉ?                     | f) 1. [ ] አዎ<br>2. [ ] የለም                                              | fb)1. [ ] አዎ<br>2. [ ] የለም | fc)1. [ ]<br>2. [ ]<br>3. [ ] | fd)1. [ ]<br>2. [ ]<br>3. [ ] |
| 15 |                                                                        |                                                                         |                            |                               |                               |
| 16 |                                                                        |                                                                         |                            |                               |                               |
| 17 |                                                                        |                                                                         |                            |                               |                               |
| 18 | g) እርሶ ሳይፈልጉ ጉልበት በመጠቀም የግብረ-ስጋ ግንኙነት እንዲፈጽሙ ተገደው ያውቃሉ?                | g) 1. [ ] አዎ<br>2. [ ] የለም                                              | gb)1. [ ] አዎ<br>2. [ ] የለም | gc)1. [ ]<br>2. [ ]<br>3. [ ] | gd)1. [ ]<br>2. [ ]<br>3. [ ] |
| 19 |                                                                        |                                                                         |                            |                               |                               |
| 20 |                                                                        |                                                                         |                            |                               |                               |
| 21 |                                                                        |                                                                         |                            |                               |                               |
| 22 | h) አንድ የማይፈልጉት አይነት የግብረ-ስጋ ግንኙነት ለመፈፀም ተገደው ያውቃሉ?                     | h) 1. [ ] አዎ<br>2. [ ] የለም                                              | hb)1. [ ] አዎ<br>2. [ ] የለም | hc)1. [ ]<br>2. [ ]<br>3. [ ] | hd)1. [ ]<br>2. [ ]<br>3. [ ] |
| 23 |                                                                        |                                                                         |                            |                               |                               |
| 24 |                                                                        |                                                                         |                            |                               |                               |
| 25 |                                                                        |                                                                         |                            |                               |                               |
| 26 | i) አንድ ነገር ያደርገኛል ብሎ በመፍራት ፍላጎት ሳይኖርዎት የግብረ-ስጋ ግንኙነት አድርገው ያውቃሉ?       | i) 1. [ ] አዎ<br>2. [ ] የለም                                              | ib)1. [ ] አዎ<br>2. [ ] የለም | ic)1. [ ]<br>2. [ ]<br>3. [ ] | id)1. [ ]<br>2. [ ]<br>3. [ ] |
| 27 |                                                                        |                                                                         |                            |                               |                               |
| 28 |                                                                        |                                                                         |                            |                               |                               |
| 29 |                                                                        |                                                                         |                            |                               |                               |
| 30 | <b>ማስታወሻ:</b>                                                          |                                                                         |                            |                               |                               |
| 31 | <b>ተጠያቂው ከላይ በመለሱት ከ(F58a- F58i) ምንም ዓይነት ጥቃት ካልደረሰባቸው ወደ F78 ይታለፍ</b> |                                                                         |                            |                               |                               |
| 32 |                                                                        |                                                                         |                            |                               |                               |
| 33 |                                                                        |                                                                         |                            |                               |                               |
| 34 | F59.                                                                   | ነፍሱ ጠር እያሉ ባለቤትዎ መቶዎት ወይም የመምታት ሙከራ አድርጎብዎት ያውቃሉ?                       | 1. [ ] አዎ<br>2. [ ] የለም    |                               |                               |
| 35 |                                                                        |                                                                         |                            |                               |                               |
| 36 |                                                                        |                                                                         |                            |                               |                               |
| 37 | F60.                                                                   | በባለቤትዎ ድርጊት የተነሳ ባለፉት 12 ወራት ነዚህ በታች የተጠቀሱት ደርሶቦት ወይም አስቃይቶዎት ያውቃሉ?     | ጊዜ ውስጥ                     |                               |                               |
| 38 |                                                                        |                                                                         |                            |                               |                               |
| 39 |                                                                        |                                                                         |                            |                               |                               |
| 40 |                                                                        | a) መቆረጥ፤ መቁሰል፤ የሰውነት መበለዝ ወይም ህመም?                                      | a) 1. [ ] አዎ 2. [ ] የለም    |                               |                               |
| 41 |                                                                        |                                                                         |                            |                               |                               |
| 42 |                                                                        | b) ቃጠሎ አደጋ?                                                             | b) 1. [ ] አዎ 2. [ ] የለም    |                               |                               |
| 43 |                                                                        |                                                                         |                            |                               |                               |
| 44 |                                                                        | c) ከፍተኛ ቁስለት የአጥንት ስብራት የጠርስ መሰበር ወይም ሌላ ከፍተኛ አደጋ? (የጀር፤ አይን መጥፋት)      | c) d) 1. [ ] አዎ 2. [ ] የለም |                               |                               |
| 45 |                                                                        |                                                                         |                            |                               |                               |
| 46 |                                                                        | d) ራስን መሳት ወይም ሰገራ ሸንት ማምለጥ?                                            | e) 1. [ ] አዎ 2. [ ] የለም    |                               |                               |
| 47 |                                                                        |                                                                         |                            |                               |                               |
| 48 | F61.                                                                   | ባለፉት 12 ወራት ጊዜ ውስጥ ባለቤትዎ ያደረጉበት ነገር የተነሳ ህክምና ማድረግ ፈልገው ያላገኙበት ጊዜ ነበር?  | 1. [ ] አዎ<br>2. [ ] የለም    |                               |                               |
| 49 |                                                                        |                                                                         |                            |                               |                               |
| 50 |                                                                        |                                                                         |                            |                               |                               |
| 51 | F62.                                                                   | ባለፉት 12 ወራት ጊዜ ውስጥ በጉዳቱ /በአደጋው ምክንያት ሆስፒታል ወይም ሌላ ጤና ተቋም ውስጥ አድረው ያውቃሉ? | 1. [ ] አዎ<br>2. [ ] የለም    |                               |                               |
| 52 |                                                                        |                                                                         |                            |                               |                               |
| 53 |                                                                        |                                                                         |                            |                               |                               |
| 54 |                                                                        |                                                                         |                            |                               |                               |
| 55 |                                                                        |                                                                         |                            |                               |                               |
| 56 |                                                                        |                                                                         |                            |                               |                               |
| 57 |                                                                        |                                                                         |                            |                               |                               |
| 58 |                                                                        |                                                                         |                            |                               |                               |
| 59 |                                                                        |                                                                         |                            |                               |                               |
| 60 |                                                                        |                                                                         |                            |                               |                               |

# Reporting checklist for cross sectional study.

Based on the STROBE cross sectional guidelines.

## Instructions to authors

Complete this checklist by entering the page numbers from your manuscript where readers will find each of the items listed below.

Your article may not currently address all the items on the checklist. Please modify your text to include the missing information. If you are certain that an item does not apply, please write "n/a" and provide a short explanation.

Upload your completed checklist as an extra file when you submit to a journal.

In your methods section, say that you used the STROBE cross sectional reporting guidelines, and cite them as:

von Elm E, Altman DG, Egger M, Pocock SJ, Gøtzsche PC, Vandenbroucke JP. The Strengthening the Reporting of Observational Studies in Epidemiology (STROBE) Statement: guidelines for reporting observational studies.

|                           |                                                                                                        | Page   |
|---------------------------|--------------------------------------------------------------------------------------------------------|--------|
|                           | Reporting Item                                                                                         | Number |
| <b>Title and abstract</b> |                                                                                                        |        |
| Title                     | <a href="#">#1a</a> Indicate the study's design with a commonly used term in the title or the abstract | 1      |

|    |                      |                     |                                                                 |   |
|----|----------------------|---------------------|-----------------------------------------------------------------|---|
| 1  | Abstract             | <a href="#">#1b</a> | Provide in the abstract an informative and balanced             | 2 |
| 2  |                      |                     |                                                                 |   |
| 3  |                      |                     |                                                                 |   |
| 4  |                      |                     | summary of what was done and what was found                     |   |
| 5  |                      |                     |                                                                 |   |
| 6  | <b>Introduction</b>  |                     |                                                                 |   |
| 7  |                      |                     |                                                                 |   |
| 8  |                      |                     |                                                                 |   |
| 9  |                      |                     |                                                                 |   |
| 10 | Background /         | <a href="#">#2</a>  | Explain the scientific background and rationale for the         | 3 |
| 11 |                      |                     |                                                                 |   |
| 12 | rationale            |                     | investigation being reported                                    |   |
| 13 |                      |                     |                                                                 |   |
| 14 |                      |                     |                                                                 |   |
| 15 | Objectives           | <a href="#">#3</a>  | State specific objectives, including any prespecified           | 4 |
| 16 |                      |                     |                                                                 |   |
| 17 |                      |                     | hypotheses                                                      |   |
| 18 |                      |                     |                                                                 |   |
| 19 |                      |                     |                                                                 |   |
| 20 | <b>Methods</b>       |                     |                                                                 |   |
| 21 |                      |                     |                                                                 |   |
| 22 |                      |                     |                                                                 |   |
| 23 | Study design         | <a href="#">#4</a>  | Present key elements of study design early in the paper         | 5 |
| 24 |                      |                     |                                                                 |   |
| 25 |                      |                     |                                                                 |   |
| 26 | Setting              | <a href="#">#5</a>  | Describe the setting, locations, and relevant dates, including  | 5 |
| 27 |                      |                     |                                                                 |   |
| 28 |                      |                     |                                                                 |   |
| 29 |                      |                     | periods of recruitment, exposure, follow-up, and data           |   |
| 30 |                      |                     |                                                                 |   |
| 31 |                      |                     | collection                                                      |   |
| 32 |                      |                     |                                                                 |   |
| 33 |                      |                     |                                                                 |   |
| 34 | Eligibility criteria | <a href="#">#6a</a> | Give the eligibility criteria, and the sources and methods of   |   |
| 35 |                      |                     |                                                                 |   |
| 36 |                      |                     | selection of participants.                                      |   |
| 37 |                      |                     |                                                                 |   |
| 38 |                      |                     |                                                                 |   |
| 39 |                      |                     |                                                                 |   |
| 40 |                      | <a href="#">#7</a>  | Clearly define all outcomes, exposures, predictors, potential   |   |
| 41 |                      |                     |                                                                 |   |
| 42 |                      |                     | confounders, and effect modifiers. Give diagnostic criteria, if |   |
| 43 |                      |                     |                                                                 |   |
| 44 |                      |                     | applicable                                                      |   |
| 45 |                      |                     |                                                                 |   |
| 46 |                      |                     |                                                                 |   |
| 47 | Data sources /       | <a href="#">#8</a>  | For each variable of interest give sources of data and details  | 6 |
| 48 |                      |                     |                                                                 |   |
| 49 | measurement          |                     | of methods of assessment (measurement). Describe                |   |
| 50 |                      |                     |                                                                 |   |
| 51 |                      |                     | comparability of assessment methods if there is more than       |   |
| 52 |                      |                     |                                                                 |   |
| 53 |                      |                     | one group. Give information separately for for exposed and      |   |
| 54 |                      |                     |                                                                 |   |
| 55 |                      |                     | unexposed groups if applicable.                                 |   |
| 56 |                      |                     |                                                                 |   |
| 57 |                      |                     |                                                                 |   |
| 58 |                      |                     |                                                                 |   |
| 59 |                      |                     |                                                                 |   |
| 60 |                      |                     |                                                                 |   |

|    |                |                      |                                                               |     |
|----|----------------|----------------------|---------------------------------------------------------------|-----|
| 1  | Bias           | <a href="#">#9</a>   | Describe any efforts to address potential sources of bias     | 5,6 |
| 2  |                |                      |                                                               |     |
| 3  |                |                      |                                                               |     |
| 4  | Study size     | <a href="#">#10</a>  | Explain how the study size was arrived at                     | 5   |
| 5  |                |                      |                                                               |     |
| 6  |                |                      |                                                               |     |
| 7  | Quantitative   | <a href="#">#11</a>  | Explain how quantitative variables were handled in the        | 6,7 |
| 8  | variables      |                      | analyses. If applicable, describe which groupings were        |     |
| 9  |                |                      | chosen, and why                                               |     |
| 10 |                |                      |                                                               |     |
| 11 |                |                      |                                                               |     |
| 12 |                |                      |                                                               |     |
| 13 |                |                      |                                                               |     |
| 14 |                |                      |                                                               |     |
| 15 | Statistical    | <a href="#">#12a</a> | Describe all statistical methods, including those used to     | 6,7 |
| 16 | methods        |                      | control for confounding                                       |     |
| 17 |                |                      |                                                               |     |
| 18 |                |                      |                                                               |     |
| 19 |                |                      |                                                               |     |
| 20 | Statistical    | <a href="#">#12b</a> | Describe any methods used to examine subgroups and            | 6,7 |
| 21 | methods        |                      | interactions                                                  |     |
| 22 |                |                      |                                                               |     |
| 23 |                |                      |                                                               |     |
| 24 |                |                      |                                                               |     |
| 25 |                |                      |                                                               |     |
| 26 | Statistical    | <a href="#">#12c</a> | Explain how missing data were addressed                       | N/A |
| 27 | methods        |                      |                                                               |     |
| 28 |                |                      |                                                               |     |
| 29 |                |                      |                                                               |     |
| 30 |                |                      |                                                               |     |
| 31 | Statistical    | <a href="#">#12d</a> | If applicable, describe analytical methods taking account of  | N/A |
| 32 | methods        |                      | sampling strategy                                             |     |
| 33 |                |                      |                                                               |     |
| 34 |                |                      |                                                               |     |
| 35 |                |                      |                                                               |     |
| 36 | Statistical    | <a href="#">#12e</a> | Describe any sensitivity analyses                             | N/A |
| 37 | methods        |                      |                                                               |     |
| 38 |                |                      |                                                               |     |
| 39 |                |                      |                                                               |     |
| 40 |                |                      |                                                               |     |
| 41 |                |                      |                                                               |     |
| 42 | <b>Results</b> |                      |                                                               |     |
| 43 |                |                      |                                                               |     |
| 44 |                |                      |                                                               |     |
| 45 | Participants   | <a href="#">#13a</a> | Report numbers of individuals at each stage of study—eg       | 7   |
| 46 |                |                      | numbers potentially eligible, examined for eligibility,       |     |
| 47 |                |                      | confirmed eligible, included in the study, completing follow- |     |
| 48 |                |                      | up, and analysed. Give information separately for for         |     |
| 49 |                |                      | exposed and unexposed groups if applicable.                   |     |
| 50 |                |                      |                                                               |     |
| 51 |                |                      |                                                               |     |
| 52 |                |                      |                                                               |     |
| 53 |                |                      |                                                               |     |
| 54 |                |                      |                                                               |     |
| 55 |                |                      |                                                               |     |
| 56 |                |                      |                                                               |     |
| 57 | Participants   | <a href="#">#13b</a> | Give reasons for non-participation at each stage              | N/A |
| 58 |                |                      |                                                               |     |
| 59 |                |                      |                                                               |     |
| 60 |                |                      |                                                               |     |



|    |                   |                      |                                                                   |          |
|----|-------------------|----------------------|-------------------------------------------------------------------|----------|
| 1  | Participants      | <a href="#">#13c</a> | Consider use of a flow diagram                                    |          |
| 2  |                   |                      |                                                                   |          |
| 3  |                   |                      |                                                                   |          |
| 4  | Descriptive data  | <a href="#">#14a</a> | Give characteristics of study participants (eg demographic,       | 7,8      |
| 5  |                   |                      | clinical, social) and information on exposures and potential      |          |
| 6  |                   |                      | confounders. Give information separately for exposed and          |          |
| 7  |                   |                      | unexposed groups if applicable.                                   |          |
| 8  |                   |                      |                                                                   |          |
| 9  |                   |                      |                                                                   |          |
| 10 |                   |                      |                                                                   |          |
| 11 |                   |                      |                                                                   |          |
| 12 |                   |                      |                                                                   |          |
| 13 |                   |                      |                                                                   |          |
| 14 | Descriptive data  | <a href="#">#14b</a> | Indicate number of participants with missing data for each        | N/A      |
| 15 |                   |                      | variable of interest                                              |          |
| 16 |                   |                      |                                                                   |          |
| 17 |                   |                      |                                                                   |          |
| 18 |                   |                      |                                                                   |          |
| 19 | Outcome data      | <a href="#">#15</a>  | Report numbers of outcome events or summary measures.             | 10,11,12 |
| 20 |                   |                      | Give information separately for exposed and unexposed             |          |
| 21 |                   |                      | groups if applicable.                                             |          |
| 22 |                   |                      |                                                                   |          |
| 23 |                   |                      |                                                                   |          |
| 24 |                   |                      |                                                                   |          |
| 25 |                   |                      |                                                                   |          |
| 26 |                   |                      |                                                                   |          |
| 27 | Main results      | <a href="#">#16a</a> | Give unadjusted estimates and, if applicable, confounder-         | 9,10     |
| 28 |                   |                      | adjusted estimates and their precision (eg, 95% confidence        |          |
| 29 |                   |                      | interval). Make clear which confounders were adjusted for         |          |
| 30 |                   |                      | and why they were included                                        |          |
| 31 |                   |                      |                                                                   |          |
| 32 |                   |                      |                                                                   |          |
| 33 |                   |                      |                                                                   |          |
| 34 |                   |                      |                                                                   |          |
| 35 |                   |                      |                                                                   |          |
| 36 |                   |                      |                                                                   |          |
| 37 | Main results      | <a href="#">#16b</a> | Report category boundaries when continuous variables were         | N/A      |
| 38 |                   |                      | categorized                                                       |          |
| 39 |                   |                      |                                                                   |          |
| 40 |                   |                      |                                                                   |          |
| 41 |                   |                      |                                                                   |          |
| 42 | Main results      | <a href="#">#16c</a> | If relevant, consider translating estimates of relative risk into | N/A      |
| 43 |                   |                      | absolute risk for a meaningful time period                        |          |
| 44 |                   |                      |                                                                   |          |
| 45 |                   |                      |                                                                   |          |
| 46 |                   |                      |                                                                   |          |
| 47 |                   |                      |                                                                   |          |
| 48 | Other analyses    | <a href="#">#17</a>  | Report other analyses done—e.g., analyses of subgroups            | 11,12    |
| 49 |                   |                      | and interactions, and sensitivity analyses                        |          |
| 50 |                   |                      |                                                                   |          |
| 51 |                   |                      |                                                                   |          |
| 52 |                   |                      |                                                                   |          |
| 53 | <b>Discussion</b> |                      |                                                                   |          |
| 54 |                   |                      |                                                                   |          |
| 55 |                   |                      |                                                                   |          |
| 56 | Key results       | <a href="#">#18</a>  | Summarise key results with reference to study objectives          | 12       |
| 57 |                   |                      |                                                                   |          |
| 58 |                   |                      |                                                                   |          |
| 59 |                   |                      |                                                                   |          |
| 60 |                   |                      |                                                                   |          |

|    |                          |                     |                                                                |    |
|----|--------------------------|---------------------|----------------------------------------------------------------|----|
| 1  | Limitations              | <a href="#">#19</a> | Discuss limitations of the study, taking into account sources  | 24 |
| 2  |                          |                     | of potential bias or imprecision. Discuss both direction and   |    |
| 3  |                          |                     | magnitude of any potential bias.                               |    |
| 4  |                          |                     |                                                                |    |
| 5  |                          |                     |                                                                |    |
| 6  |                          |                     |                                                                |    |
| 7  |                          |                     |                                                                |    |
| 8  |                          |                     |                                                                |    |
| 9  | Interpretation           | <a href="#">#20</a> | Give a cautious overall interpretation considering objectives, | 24 |
| 10 |                          |                     | limitations, multiplicity of analyses, results from similar    |    |
| 11 |                          |                     | studies, and other relevant evidence.                          |    |
| 12 |                          |                     |                                                                |    |
| 13 |                          |                     |                                                                |    |
| 14 |                          |                     |                                                                |    |
| 15 |                          |                     |                                                                |    |
| 16 | Generalisability         | <a href="#">#21</a> | Discuss the generalisability (external validity) of the study  | 2  |
| 17 |                          |                     | results                                                        |    |
| 18 |                          |                     |                                                                |    |
| 19 |                          |                     |                                                                |    |
| 20 |                          |                     |                                                                |    |
| 21 |                          |                     |                                                                |    |
| 22 | <b>Other Information</b> |                     |                                                                |    |
| 23 |                          |                     |                                                                |    |
| 24 |                          |                     |                                                                |    |
| 25 | Funding                  | <a href="#">#22</a> | Give the source of funding and the role of the funders for the | 15 |
| 26 |                          |                     | present study and, if applicable, for the original study on    |    |
| 27 |                          |                     | which the present article is based                             |    |
| 28 |                          |                     |                                                                |    |
| 29 |                          |                     |                                                                |    |
| 30 |                          |                     |                                                                |    |
| 31 |                          |                     |                                                                |    |
| 32 |                          |                     |                                                                |    |

33 None The STROBE checklist is distributed under the terms of the Creative Commons Attribution  
34 License CC-BY. This checklist can be completed online using <https://www.goodreports.org/>, a tool  
35 made by the [EQUATOR Network](#) in collaboration with [Penelope.ai](#)  
36  
37  
38  
39  
40  
41  
42  
43  
44  
45  
46  
47  
48  
49  
50  
51  
52  
53  
54  
55  
56  
57  
58  
59  
60

# BMJ Open

**Prevalence of intimate partner violence among reproductive-age women with severe mental illness attending psychiatry outpatient care, A cross-sectional study in Addis Ababa, Ethiopia**

|                                 |                                                                                                                                                                                                                                                                                                                                               |
|---------------------------------|-----------------------------------------------------------------------------------------------------------------------------------------------------------------------------------------------------------------------------------------------------------------------------------------------------------------------------------------------|
| Journal:                        | <i>BMJ Open</i>                                                                                                                                                                                                                                                                                                                               |
| Manuscript ID                   | bmjopen-2020-045251.R1                                                                                                                                                                                                                                                                                                                        |
| Article Type:                   | Original research                                                                                                                                                                                                                                                                                                                             |
| Date Submitted by the Author:   | 14-Apr-2021                                                                                                                                                                                                                                                                                                                                   |
| Complete List of Authors:       | Zerihun, Tigist; St Paul's Hospital Millennium Medical College, Psychiatry<br>Tsfaye, Markos; St Paul's Hospital Millennium Medical College, Psychiatry<br>Deyessa, Negussie; Addis Ababa University College of Health Sciences, Public Health<br>Bekele, Delayehu ; St Paul's Hospital Millennium Medical College, Obstetrics and gynecology |
| <b>Primary Subject Heading</b>: | Mental health                                                                                                                                                                                                                                                                                                                                 |
| Secondary Subject Heading:      | Global health                                                                                                                                                                                                                                                                                                                                 |
| Keywords:                       | Schizophrenia & psychotic disorders < PSYCHIATRY, PUBLIC HEALTH, Reproductive medicine < GYNAECOLOGY, MENTAL HEALTH                                                                                                                                                                                                                           |
|                                 |                                                                                                                                                                                                                                                                                                                                               |

SCHOLARONE™  
Manuscripts



I, the Submitting Author has the right to grant and does grant on behalf of all authors of the Work (as defined in the below author licence), an exclusive licence and/or a non-exclusive licence for contributions from authors who are: i) UK Crown employees; ii) where BMJ has agreed a CC-BY licence shall apply, and/or iii) in accordance with the terms applicable for US Federal Government officers or employees acting as part of their official duties; on a worldwide, perpetual, irrevocable, royalty-free basis to BMJ Publishing Group Ltd ("BMJ") its licensees and where the relevant Journal is co-owned by BMJ to the co-owners of the Journal, to publish the Work in this journal and any other BMJ products and to exploit all rights, as set out in our [licence](#).

The Submitting Author accepts and understands that any supply made under these terms is made by BMJ to the Submitting Author unless you are acting as an employee on behalf of your employer or a postgraduate student of an affiliated institution which is paying any applicable article publishing charge ("APC") for Open Access articles. Where the Submitting Author wishes to make the Work available on an Open Access basis (and intends to pay the relevant APC), the terms of reuse of such Open Access shall be governed by a Creative Commons licence – details of these licences and which [Creative Commons](#) licence will apply to this Work are set out in our licence referred to above.

Other than as permitted in any relevant BMJ Author's Self Archiving Policies, I confirm this Work has not been accepted for publication elsewhere, is not being considered for publication elsewhere and does not duplicate material already published. I confirm all authors consent to publication of this Work and authorise the granting of this licence.

1  
2  
3  
4  
5  
6  
7  
8  
9  
10  
11  
12  
13  
14  
15  
16  
17  
18  
19  
20  
21  
22  
23  
24  
25  
26  
27  
28  
29  
30  
31  
32  
33  
34  
35  
36  
37  
38  
39  
40  
41  
42  
43  
44  
45  
46  
47  
48  
49  
50  
51  
52  
53  
54  
55  
56  
57  
58  
59  
60

**Prevalence of intimate partner violence among reproductive age women with severe  
mental illness attending psychiatry outpatient care, A cross-sectional study in  
Addis Ababa, Ethiopia**

Tigist Zerihun<sup>1\*</sup>, Markos Tesfaye<sup>1</sup>, Negussie Deyessa<sup>2</sup>, Delayehu Bekele<sup>3</sup>

1. Department of Psychiatry, St Paul's Hospital Millennium Medical College, Addis Ababa, Ethiopia
2. Addis Ababa University, School of public health, Addis Ababa, Ethiopia
3. Department of obstetrics and gynaecology, St Paul's Hospital Millennium Medical College, Addis Ababa, Ethiopia

**\*Corresponding Author**

Tigist Zerihun\* (MD, MPHIL)

Email: [zerukaye@gmail.com](mailto:zerukaye@gmail.com); [tigsist.zerihun@sphmmc.edu.et](mailto:tigsist.zerihun@sphmmc.edu.et)

Prof Markos Tesfaye (MD, PHD)

Email: [markostesfaye92@gmail.com](mailto:markostesfaye92@gmail.com); [markos.tesfaye@sphmmc.edu.et](mailto:markos.tesfaye@sphmmc.edu.et)

Dr. Negussie Deyessa (MD, PHD)

Email: [negdaysun@gmail.com](mailto:negdaysun@gmail.com), [negussie.deyessa@aau.et](mailto:negussie.deyessa@aau.et)

Dr. Delayehu Bekele (MD, MPH)

Email: [delayehu@gmail.com](mailto:delayehu@gmail.com) , [delayehu.bekele@sphmmc.edu.et](mailto:delayehu.bekele@sphmmc.edu.et)

**Word count** 2970

## Abstract

**Objective:** To determine the prevalence of intimate partner violence (IPV) among reproductive age women attending psychiatric outpatient services and to identify associated factors.

**Design:** Cross-sectional facility-based study

**Setting:** Outpatient psychiatric clinics of public hospitals in Addis Ababa.

**Participants:** Reproductive age women with severe mental illness attending psychiatric outpatient clinics

**Primary and secondary outcome measures:** Data was collected by using a multi- culturally validated questionnaire from randomly sampled women with severe mental illness. Multiple logistic regression was done to identify factors independently associated with IPV. Ethical approval was obtained from the St. Paul's Hospital Millennium Medical College Institutional Review Board.

**Result:** Four hundred twenty-two participants who had follow up at the psychiatric outpatient clinics participated in the study. The lifetime prevalence of any form of IPV among participants was 62.0% (95% CI: 56.1, 68.8). The commonest form of IPV experienced by women was emotional violence [60%; 95% CI: 55.0, 64.7]. One hundred eighty-six [44.1%; (95% CI: 39.3, 48.8)] of respondents had experienced physical or sexual violence during the previous year. History of divorce and having a mental illness for more than five years were associated with any forms of IPV [AOR= 5.64; 95% CI: 2.75, 11.56] and [AOR= 2.23; 95%CI: 1.26, 3.93] respectively.

**Conclusion:** The high prevalence of IPV among women attending psychiatric outpatient services highlights the need to routinely inquire about IPV and develop effective strategies to prevent it among this vulnerable group.

**Keywords:** Intimate partner violence, Psychiatric outpatient, Mental illness

### Strengths and limitation

- There is scarce research on intimate partner violence among women with severe mental illness in Ethiopia and Africa at large.
- We used a multi-country setting validated standard questionnaire, which allows direct comparison of our findings with other available data.
- As a cross-sectional study, our data do not imply causality and temporality relationship between the variables.
- Data were self-reported, which may be limited by recall bias and underreporting; men were not investigated to understand the magnitude and reason for engaging in violence against their partners.
- The study was conducted among women thought to have better access to information, so the findings may not be generalisable to women with mental illness who do not attend psychiatric tertiary care facilities.

## Introduction

Intimate partner violence (IPV) among women is a widespread phenomenon globally (1). According to the WHO definition, IPV includes emotional abuse, physical or sexual violence between current and former partners (2). To date, research on IPV has predominantly focused on experiences of physical violence than the emotional and sexual aspects (3). One-third of the women in the globe experienced IPV at some point in their life (4).

Different studies reported considerable regional variation in the prevalence of IPV (5). In the World Health Organisation's multi-setting study on violence against women in intimate relationships, the prevalence ranged from 15% to 72.7% and 4%–54% in their lifetime and the past 12 months, respectively (6). In the same study, the lifetime prevalence of physical or sexual violence against women reported to be lowest from Japan(15%) and highest from Ethiopia(72.7%) (6). Another Ethiopian study has also reported a 30% prevalence among ever-married women (7). Different factors may play a role in precipitating and maintaining IPV worldwide such as marital status, education, wealth, cultural factors, mental health condition (7-10).

IPV is associated with significant morbidity and mortality, especially among women, and its prevention is a global public health priority(11, 12). Women experiencing IPV have more medical, gynecologic, and stress-related symptoms than non-abused women(11, 13). Associations of IPV with the poor mental and physical health of women have been demonstrated in the international and national numerous studies (14).

There is also strong evidence that women with severe or chronic mental illness experience higher rates of violence than women in the general population (9). Also, IPV is a known risk factor for mental health problems, including depression, post-traumatic stress disorder (PTSD) and suicide attempts (15-17). In addition to being at higher risk of experiencing each type of IPV (emotional,



1 physical and sexual ), severe mental illness (SMI) such as schizophrenia, bipolar disorder and severe  
2 major depression hinder women's capacity to protect themselves and seek help when compared to  
3 women with out SMI (12). History of IPV experience is associated with poorer health, including post-  
4 traumatic stress disorder, depression, anxiety, and significant impairment in functionality and somatic  
5 health (14, 15). Nevertheless, little is known about the prevalence of IPV among reproductive age  
6 women with SMI living in low-income settings.  
7  
8  
9  
10  
11  
12  
13  
14

15 Addressing this evidence gap is essential in developing effective interventions in this vulnerable  
16 group. Therefore, we aimed to examine the prevalence of IPV and associated factors among women  
17 with SMI in Ethiopia.  
18  
19  
20  
21  
22  
23  
24  
25

## 26 **Methods**

### 27 **Study design and setting**

28  
29 The health facility-based cross-sectional study design was undertaken in Addis Ababa, the capital  
30 city of Ethiopia. The city has an estimated population of 3.2 million (18). The study was conducted  
31 from December 2016 to May 2017 in four outpatient clinics of public hospitals delivering mental  
32 health services by psychiatrists or psychiatric residents. The four hospitals are St. Paul's Hospital,  
33 Yekatit 12 Hospital, Zewditu Memorial Hospital and Amanuel Hospital.  
34  
35  
36  
37  
38  
39  
40  
41  
42  
43  
44  
45

### 46 **Sample Size Determination**

47  
48 The sample size for the study was calculated based on the following assumptions: the prevalence of  
49 IPV among women with SMI (Schizophrenia, bipolar disorder and severe major depression) ( $P=50\%$ )  
50 taken to obtain the maximum sample size,  $Z = 1.96$  at 95% confidence level,  $d =$  the level of precision  
51 (0.05), and adding for non-response of 10 %; this gave a total required sample size of  $n= 423$ .  
52  
53  
54  
55  
56  
57  
58  
59  
60

## 1           **Sampling procedure**

2  
3  
4           The study subjects were recruited from psychiatric outpatient clinics of the four hospitals. All  
5  
6           consenting women aged 18-49 years who presented in the study period were included. To recruit the  
7  
8           study subjects a total of 497 women patients were approached, of which 47 (9.5%) patients were  
9  
10           excluded due to their age was below 18 years or were never in a marital relationship, 16 (3.2%) were  
11  
12           excluded due to their presentation with acute psychosis, the remaining 9 (1.8%) patients were due to  
13  
14           other exclusion criteria and only one patient was excluded due to a self withdrawal to participate.  
15  
16           Finally, the study included a total of 422 study participants (Figure 1).  
17  
18  
19  
20  
21  
22

## 23           **Data Collection Methods and instrument**

24  
25  
26           An interviewer-administered structured questionnaire was used to collect the data. Standardised pre-  
27  
28           tested Amharic (National language of Ethiopia ) version of a multiculturally validated World Health  
29  
30           Organizations IPV tool was used to collect information relevant for measuring physical, sexual and  
31  
32           emotional violence by an intimate partner (6). Sociodemographic characteristics and disease-related  
33  
34           characteristics of the participants were also assessed. Women who had experienced IPV were further  
35  
36           asked to qualify the type of experience and the timing, i.e. whether it was in the previous twelve  
37  
38           months or not. Additionally, the questions on spousal control over the respondent were adopted and  
39  
40           used to measure and categorise with different items referring to what a woman could without  
41  
42           permission from her spouse/partner, including her healthcare-related activities.  
43  
44  
45  
46

47           The final Amharic version of the questionnaire was administered by trained and experienced female  
48  
49           psychiatric nurses, with an emphasis on a respectful, non-judgemental approach and facilitating the  
50  
51           women to be at ease. The participants were interviewed after they had completed their follow up visit  
52  
53           as an exit interview.  
54  
55  
56  
57

1 Data quality was assured by designing a fully structured questionnaire which was pre-tested in twenty  
2 participants in different psychiatric outpatient clinics. Three days of training was given for  
3 supervisors and data collectors. The collected data were examined for completeness and internal  
4 consistency on the same day by supervisors.  
5  
6  
7  
8  
9

## 10 **Analysis**

11 The data were preceded and entered using Epi Data version 3.1 and exported to the Statistical Package  
12 for Social Sciences (SPSS) version 20 to be cleaned and analysed. The sociodemographic  
13 characteristics and experience of IPV were summarised using descriptive statistics. The outcome  
14 variable was any intimate partner violence as categorical variable of 'yes' or 'no'. predictor variables:  
15 marital status (Married, single, Divorced, Widowed), education (Beyond High school, High school,  
16 Elementary, Illiterates), occupation (Unemployed, House wives/Student, Daily labourer / House  
17 maid, Formal employment)  
18  
19  
20  
21  
22  
23  
24  
25  
26  
27  
28  
29

30 We used bivariate analyses to assess the associations between IPV in participant characteristics. In  
31 bivariate analysis, crude odds ratio and confidence intervals were calculated and used to select  
32 candidate variables for multiple logistic regression analysis using a significance level of  $P < 0.05$ . All  
33 variables significantly associated with bivariate analyses were included in the multivariate analysis.  
34  
35  
36  
37  
38  
39

## 40 **Ethical considerations**

41 Ethical approval was obtained from the institutional review board of Saint 'Paul's Hospital  
42 Millennium Medical College. Written informed consent was obtained from each study participant  
43 after informing them in detail about the study objectives, possible risks associated with the study, and  
44 the benefits of the study. Participants were informed about their right to participate only on a  
45 voluntary basis and to withdraw from the study without providing any explanation. The privacy of the  
46 participants was ensured during the data collection and anonymity of the collected data during  
47  
48  
49  
50  
51  
52  
53  
54  
55  
56  
57

1 analysis, interpretation and write up. Participants who needed any psychological support during the  
2  
3 data collection were referred for treatment and support.  
4  
5

## 6 Public and patient involvement 7

8  
9 The public and patients were not involved in the survey design and in the recruitment to and conduct  
10 of the study. Dissemination of the findings will be provided for participants based on their request.  
11  
12 Community members will be consulted in the design and implementation of any studies that build on  
13  
14 this initial study.  
15  
16  
17

## 18 Results 19

### 20 Sociodemographic characteristics of respondents 21 22

23  
24 A total of 422 women of reproductive age women were approached and participated giving a response  
25 rate of 100%. The mean age of respondents was  $32.1 \pm 6.7$  years, with a range of 18 to 46. One-third  
26 of the participants were not legally married (32.9%; n=139). Four out of ten women were either  
27 illiterate or had only primary level education. Only 27 % of women were employed. (Table 1). The  
28 majority (80%) of the participants had a diagnosis of mental illness for more than one year. A  
29 significant proportion of the participants, 46.3%, n=156, lived with the illness for more than 5 years.  
30  
31  
32  
33  
34  
35  
36  
37  
38  
39  
40  
41  
42  
43  
44  
45  
46  
47  
48  
49  
50  
51  
52  
53  
54  
55  
56  
57  
58  
59  
60

Table 1. Demographic and clinical characteristics of participants (n=422)

| Characteristics                        | Frequency | Percentage |
|----------------------------------------|-----------|------------|
| <25                                    | 63        | 14.9       |
| 25-34                                  | 186       | 44.1       |
| >35                                    | 173       | 41.0       |
| <b>Marital status</b>                  |           |            |
| Single                                 | 139       | 32.9       |
| Married                                | 187       | 44.3       |
| Widowed                                | 26        | 6.2        |
| Divorced                               | 70        | 16.6       |
| <b>Number of alive children</b>        |           |            |
| Have living children                   | 180       | 42.7       |
| No children                            | 158       | 37.4       |
| 1-2                                    | 84        | 19.9       |
| <b>Education</b>                       |           |            |
| Tertiary level                         | 60        | 14.2       |
| Secondary level (high school)          | 195       | 46.2       |
| Primary level                          | 123       | 29.2       |
| Illiterate                             | 44        | 10.4       |
| <b>Diagnosis</b>                       |           |            |
| Schizophrenia                          | 170       | 40.3       |
| Bipolar disorder                       | 116       | 27.5       |
| Major depressive disorder              | 136       | 32.2       |
| <b>Psychotropic medication</b>         |           |            |
| Antipsychotics                         | 208       | 49.3       |
| Mood stabiliser                        | 67        | 15.9       |
| Antidepressant                         | 147       | 34.8       |
| <b>Duration of treatment in months</b> |           |            |
| 1-24                                   | 163       | 38.6       |
| 25-48                                  | 91        | 21.6       |
| 49 months and above                    | 168       | 39.8       |
| <b>Occupation</b>                      |           |            |
| No Job                                 | 160       | 37.9       |
| Housewives/students                    | 93        | 22.1       |
| House maid /Daily laborer              | 55        | 13.0       |
| Employed (Formal)                      | 114       | 27.0       |

## Lifetime prevalence

In this study, the lifetime prevalence of IPV was 62.0% [95% CI: 56.1, 68.8]. The commonest form of IPV experienced by women was emotional abuse 60% [95% CI: 55.0, 64.7] while 38.6% [95% CI: 34.1, 43.6] of participants experienced some form of physical violence in their lifetime. Among those who reported physical violence, significant proportion 25.6% [95% CI: 21.6, 29.6] reported severe form of physical violence. The commonest form of severe physical violence was being beaten by fist on the face 21.8% [95% CI: 17.3, 25.6] followed by, 13% [95% CI: 9.7, 16.1] being kicked on different parts of their bodies. More than three percent of women who experienced physical violence reported loss of consciousness, incontinence, fracture, or bleeding. Only 2% of participants sought medical service for the incident. Moreover, 38% [95% CI: 28.7, 47.2] of women who had experienced severe physical violence reported that the incident occurred while they were pregnant.

Regarding sexual violence, nearly one third 31.3% [95% CI: 26.8, 36.0] of the study participants reported ever experiencing any form of sexual violence, and 25.1% [95% CI: 20.9, 29.1] were compelled by their partner to have sex.

More than one-third of all respondents, 36.2% [95% CI: 31.3, 41.0], had at least one pregnancy after they received the diagnosis of mental illness. Of these 58.1% [95% CI: 53.1, 62.3] pregnancies were unintended, and 53.9% [45.3, 63.3] of which ended up in induced abortion. In 29% [95% CI: 21.1, 35.9] of these pregnancies arising from forced sexual intercourse, the women resorted to induced abortion and terminated the pregnancy. Additionally, one out of three participants had sexual intercourse before the age of 18, putting them at an increased risk of teenage pregnancy.

## Twelve months of prevalence

Among women who participated in this survey, 44.1 % [ 95% CI: 39.3, 48.8], 35.3 % [ 95% CI:31.0,40.3] and 25.1% [ 95% CI:21.3,29.9] reported to have experienced physical and sexual violence within the 12 months preceding the interview, respectively. Of those who reported physical violence, 95% [ 95% CI:91.3,98.0] of them reported severe, i.e. being hit with a fist or object on the face. Two per cent of them were able to get treatment, and the other two percent spent a night in the hospital for the damage due to the physical attack by their male partner. There was no statistically significant difference in the prevalence of IPV among women by the psychiatric diagnosis.

## Emotional violence and spousal control

Almost 60 % of participants had experienced moderate 25.0% [95% CI:21.2,29.3] or severe 34.8% [95% CI:30.0,39.0] forms of emotional violence, and more than 92 % [95% CI:90.0,95.3] were partially or entirely restricted in what they could do, requiring permission from their spouse in their lifetime. More than 70 % [ 95% CI:67.1,95.3] of participants would not visit healthcare facilities for treatment without getting approval from their partner (Table 2).

## Table 2: Spousal control among participants

| Types of spousal control                                                                        | Never N (%) | Yes N (%)  |
|-------------------------------------------------------------------------------------------------|-------------|------------|
| Have you ever been prohibited not to meet your friend by your partner?                          | 210 (49.8%) | 212(50.2%) |
| Does your partner make a restrict /limit limitation on your contact with your family?           | 234(55.5%)  | 188(44.5%) |
| Does your partner insist on knowing where you are all times; always want to know where you are? | 189(44.8%)  | 233(55.2%) |
| Does your partner ignore or treats you indifferently?                                           | 153(36.3%)  | 269(63.7%) |
| Does your partner become annoyed when you talk with other men?                                  | 113(26.8%)  | 309(73.2%) |
| Does, your partner often accuses you of being unfaithful?                                       | 148(35.1%)  | 274(64.9%) |
| Does your partner want to ask him permission when you go out from home?                         | 117(27.9%)  | 303(72.1%) |
| Does your partner want you to ask him permission before visiting health care service?           | 121(28.7%)  | 300(71.3%) |
| Does your partner force you not to express your feeling to other people?                        | 192(45.5%)  | 230(54.5%) |

### Factors associated with IPV

In the logistic regression model, marital status, occupation, duration of illness and spousal control were significantly associated with IPV (Table 3). The prevalence of physical and/or sexual violence was significantly higher among unemployed women [AOR=2.35; 95% CI, 1.23, 4.41], daily labourers or housemaids [AOR=3.33; 95% CI, 1.45, 7.61] compared to women who were employed. Moreover, the odds of IPV was higher among women with history of being divorced [AOR=4.97; 95% CI, 2.36, 10.45] and non-married women [AOR=3.56; 95% CI, 2.09, 6.04] compared to currently married women. The study also depicted that women who were diagnosed with mental illness more than 5 years ago were more likely to experience IPV compared to women who are newly diagnosed [AOR=2.11; 95% CI, 1.17, 3.82]. However, the study did not find a difference in the experience of IPV by level of income or educational level (Table 3).



Table 3. Factors associated with intimate partner violence among women with severe mental illness

| Characteristics             | IPV       |           | COR (95% CI)     | AOR (95%CI)              |
|-----------------------------|-----------|-----------|------------------|--------------------------|
|                             | Yes N (%) | No N (%)  |                  |                          |
| Income                      |           |           |                  |                          |
| Yes                         | 165(67.6) | 79(32.4)  | 1.67(1.12,2.48)  | 1.08(0.64,1.82)          |
| No                          | 99(55.6)  | 79(44.4)  | 1                | 1                        |
| Occupation                  |           |           |                  |                          |
| Unemployed                  | 117(73.1) | 43(26.9)  | 2.63(1.58,4.36)  | <b>2.35 (1.23,4.41)</b>  |
| House wives/Student         | 46(49.5)  | 47(50.5)  | 0.94(0.55,1.63)  | 1.49(0.77,2.88)          |
| Daily labourer / House maid | 43(78.2)  | 12(21.8)  | 3.46(1.65,7.24)  | <b>3.33 (1.45, 7.61)</b> |
| Formal employment           | 58(50.9)  | 56(49.1)  | 1                | 1                        |
| Marital status              |           |           |                  |                          |
| Married                     | 83(44.4)  | 104(55.6) | 1                | 1                        |
| Divorced                    | 59(84.3)  | 11(15.7)  | 6.72(3.32,13.60) | <b>4.97(2.36,10.45)</b>  |
| Widowed                     | 16(61.5)  | 10(38.5)  | 2.05(0.86,4.64)  | 1.74(0.72,4.19)          |
| Single                      | 106(76.3) | 33(23.7)  | 4.03(2.48,6.54)  | <b>3.56(2.09, 6.04)</b>  |
| Education                   |           |           |                  |                          |
| Beyond High school          | 35(58.3)  | 25(41.7)  | 1                | 1                        |
| High school                 | 124(63.6) | 71(36.4)  | 1.25(0.69,2.25)  | 0.96(0.49,1.86)          |
| Elementary                  | 76(61.3)  | 48(38.7)  | 1.13(0.60,2.12)  | 0.86(0.40,1.83)          |
| Illiterates                 | 29(67.4)  | 14(32.6)  | 1.48(0.65,3.36)  | 1.38(0.54,3.56)          |
| Duration of illness         |           |           |                  |                          |
| Less than 1 year            | 41(48.2)  | 44(51.8)  | 1                | 1                        |
| 1 – 5 years                 | 87(58.4)  | 62(41.6)  | 1.50(0.88,2.57)  | 1.25(0.69,2.26)          |
| >5years                     | 136(72.3) | 52(27.7)  | 2.81(1.649,4.78) | <b>2.11(1.17, 3.82)</b>  |

## Discussion

Despite high prevalence reports of IPV in community-based studies in Ethiopia, there is no study which focused on women with severe mental illness. In this study, we found a high prevalence of lifetime and recent IPV in this vulnerable group of population.

A substantial proportion (62%) of women reported IPV in their life time, which happened relatively frequently, suggesting that this is a common experience among women with severe mental illness. This finding is similar with the study from rural Ethiopia which reported 60.7% violent against people with SMI (19). Likewise the finding of IPV in this study is as high as the WHO community prevalence

1 study report from Ethiopia which is 72% (20) and Tanzanian study (61%) (21) but higher than the  
2  
3 community study in northern Ethiopia (22) and a report from systematic review which is 33% IPV  
4  
5 among women with SMI attending outpatient clinic(23) The difference can be explained by study  
6  
7 population differences as the participants of the northern Ethiopian study were women in the rural  
8  
9 community while our study participants were urban residents and higher educational level. This study  
10  
11 also reported (44%) recent intimate partner violence which is higher than studies from high income  
12  
13 countries such as 21% of past twelve month IPV reported from UK(24) and 30.3 % in Spain(25). This  
14  
15 is consistent with the assertion that that women with SMI constitute a vulnerable segment of the  
16  
17 population who need special protection (9) and the need that health professionals should enquire  
18  
19 about all types of recent IPV, among women with SMI.  
20  
21  
22  
23  
24

25 Generally, our finding is consistent with reports from other sub-Saharan African countries (15). As  
26  
27 these studies indicated, IPV is common social, public health and human rights concerns among  
28  
29 women with severe mental illness (26).  
30  
31  
32  
33  
34

35 We also found a high prevalence of physical violence in this study (38.5%) which is comparable with  
36  
37 other results from some African countries (26) and Asian such as India and Vietnam (27) and lower  
38  
39 than rural Ethiopian finding (20). Our findings may reflect underreporting of IPV by this vulnerable  
40  
41 group who might be more dependent on their partners for support towards the care of their mental  
42  
43 illness. This is a crucial psychosocial issue with detrimental effects on the course of the pre-existing  
44  
45 mental illness hence contributing to gender disparities in the treatment outcomes of SMI  
46  
47  
48

49 Despite a significant number of participants who reported physical violence in this study, only a small  
50  
51 proportion sought health care for their injuries. This is consistent with the low level of health-seeking  
52  
53 behaviour for IPV related injuries as reported by other studies in Ethiopia and other global studies  
54  
55  
56  
57

1 (5, 28, 29). Varying degree of emotional violence also reported in 60% of participants, which is  
2  
3 consistent with findings from Tanzania (21). It also has a significant association with poor mental  
4  
5 health as reported by other African countries (21, 30, 31). In this study, we found that both violence  
6  
7 and spousal control are common social, public health and human rights concerns among women with  
8  
9 SMI. We found that physical violence was associated with other types of violence; this is consistent  
10  
11 with research has shown that physical violence is often related to psychological or and sexual  
12  
13 coercion. Mental health care providers need to routinely inquire about IPV during outpatient visits so  
14  
15 that appropriate interventions can be offered. Our study did not find an association between women's  
16  
17 education and IPV which in contrast to is to the study from east Africa (26).  
18  
19  
20  
21

22 Despite the weaknesses of this research, which included being a hospital-based study, purely urban  
23  
24 sample and cultural bias of reporting, we have attempted to minimise non-disclosure due to cultural  
25  
26 taboo of the ~~topic~~ topic and discomfort of the ~~participants~~ participants by having female  
27  
28 experienced psychiatric nurses for interviewing the participants. We believe that the findings of the  
29  
30 current study will ~~help other~~ help other researchers to further investigate the observed relationships  
31  
32 through longitudinal studies with larger samples and the impact of these experience on the prognosis  
33  
34 of their mental illness. To reduce the burden of mental illness, continued research is recommended  
35  
36 for evaluating IPV preventive strategies. IPV was found to be associated with employment status.  
37  
38 However, causality cannot be determined due to the cross-sectional study. Further studies are needed  
39  
40 to develop interventions aimed at reducing IPV among women with SMI and test their effectiveness.  
41  
42 Although the participation was optional, no woman refused to participate in this study adds to the  
43  
44 strengths of our findings.  
45  
46  
47  
48  
49  
50  
51  
52  
53  
54  
55  
56  
57  
58  
59  
60

## Conclusions

Intimate partner violence was found to be highly prevalent among women with severe mental illness in Ethiopia. Given the detrimental effect of IPV on mental health, it may contribute to disparities in women's outcomes with SMI. IPV is more prevalent among the unemployed than the employed participants. And those with a longer duration of mental illness reported more IPV than participants with a short period of illness. -

Psychiatric outpatient clinics are an important point of contact for women with mental illness who are experiencing IPV. The treatment for mental disorders needs to include effective interventions for women who are also IPV victims. Mental health professionals play a key role in addressing IPV in this population.

## Acknowledgements

We wish to thank all study participants and their caregivers who accompanied them to the Hospitals, counsellors and data collectors for their time and commitment to the study.

## Author Contributors

We declare that all authors have made substantial contributions. TZ, MT, ND and DB conceptualise conceived the study, developed the design. TZ and ND collected and managed data. TZ, ND and DB performed the preliminary data analysis. TZ and MT performed the final data analysis. All authors contributed to the interpretation of results. TZ drafted the manuscript, and all authors contributed to critical revisions of the manuscript. All authors read and approved the final manuscript.

1  
2  
3 **Funding:** This study was supported by St Paul's Hospital Millennium Medical College. Grant number  
4  
5 001 /2016.  
6  
7

8 The funder had no role in study design, data collection and analysis, decision to publish, or  
9  
10 manuscript preparation.  
11  
12

13 **Competing interest,** the authors declare that they have no competing interests.  
14  
15

### 16 **Data availability statement**

17  
18 The authors confirm that the availability of data. Dataset is not publicly available at this point because  
19  
20 it contains sensitive information. The data that support the findings of this study are available from  
21  
22 the corresponding author, [TZ], upon reasonable request.  
23  
24  
25

### 26 **Consent for publication**

27  
28  
29 Not applicable.  
30  
31  
32  
33  
34  
35  
36  
37  
38  
39  
40  
41  
42  
43  
44  
45  
46  
47  
48  
49  
50  
51  
52  
53  
54  
55  
56  
57  
58  
59  
60

## Reference

1. Miller E, McCaw B. Intimate partner violence. *New England Journal of Medicine*. 2019;380(9):850-7.
2. Organisation WH. Responding to intimate partner violence and sexual violence against women: WHO clinical and policy guidelines: World Health Organization; 2013.
3. Feder G, Ramsay J, Dunne D, Rose M, Arsene C, Norman R, et al. How far does screening women for domestic (partner) violence in different healthcare settings meet criteria for a screening programme? Systematic reviews of nine UK National Screening Committee criteria. 2009.
4. García-Moreno C, Pallitto C, Devries K, Stöckl H, Watts C, Abrahams N. Global and regional estimates of violence against women: prevalence and health effects of intimate partner violence and non-partner sexual violence: World Health Organization; 2013.
5. Organisation WH. Global and regional estimates of violence against women: prevalence and health effects of intimate partner violence and non-partner sexual violence: World Health Organization; 2013.
6. Garcia-Moreno C, Jansen HA, Ellsberg M, Heise L, Watts CH. Prevalence of intimate partner violence: findings from the WHO multi-country study on women's health and domestic violence. *The lancet*. 2006;368(9543):1260-9.
7. Chernet AG, Cherie KT. Prevalence of intimate partner violence against women and associated factors in Ethiopia. *BMC women's health*. 2020;20(1):22.
8. Dixon L, Graham-Kevan N. Understanding the nature and etiology of intimate partner violence and implications for practice and policy. *Clinical psychology review*. 2011;31(7):1145-55.
9. Du Mont J, Forte T. Intimate partner violence among women with mental health-related activity limitations: a Canadian population based study. *BMC public health*. 2014;14(1):51.
10. Patra P, Prakash J, Patra B, Khanna P. Intimate partner violence: Wounds are deeper. *Indian journal of psychiatry*. 2018;60(4):494.
11. Vos T, Astbury J, Piers L, Magnus A, Heenan M, Stanley L, et al. Measuring the impact of intimate partner violence on the health of women in Victoria, Australia. *Bulletin of the World Health Organization*. 2006;84:739-44.
12. Bosch J, Weaver TL, Arnold LD, Clark EM. The impact of intimate partner violence on women's physical health: Findings from the Missouri behavioral risk factor surveillance system. *Journal of interpersonal violence*. 2017;32(22):3402-19.
13. Bonomi AE, Thompson RS, Anderson M, Reid RJ, Carrell D, Dimer JA, et al. Intimate partner violence and women's physical, mental, and social functioning. *American journal of preventive medicine*. 2006;30(6):458-66.
14. Dillon G, Hussain R, Loxton D, Rahman S. Mental and physical health and intimate partner violence against women: A review of the literature. *International journal of family medicine*. 2013;2013.
15. Devries KM, Mak JY, Bacchus LJ, Child JC, Falder G, Petzold M, et al. Intimate partner violence and incident depressive symptoms and suicide attempts: a systematic review of longitudinal studies. *PLoS medicine*. 2013;10(5).

16. Coker AL, Davis KE, Arias I, Desai S, Sanderson M, Brandt HM, et al. Physical and mental health effects of intimate partner violence for men and women. *American journal of preventive medicine*. 2002;23(4):260-8.
17. Afifi TO, MacMillan H, Cox BJ, Asmundson GJ, Stein MB, Sareen J. Mental health correlates of intimate partner violence in marital relationships in a nationally representative sample of males and females. *Journal of interpersonal violence*. 2009;24(8):1398-417.
18. Division UNS. country profile | Ethiopia - UNdata 2016 [cited 2020 august 14]. Available from: <https://data.un.org/CountryProfile.aspx/Images/CountryProfile.aspx?crName=Ethiopia>.
19. Tsigebrhan R, Shibre T, Medhin G, Fekadu A, Hanlon C. Violence and violent victimisation in people with severe mental illness in a rural low-income country setting: a comparative cross-sectional community study. *Schizophrenia research*. 2014;152(1):275-82.
20. Deyessa N, Berhane Y, Alem A, Ellsberg M, Emmelin M, Hogberg U, et al. Intimate partner violence and depression among women in rural Ethiopia: a cross-sectional study. *Clinical practice and epidemiology in mental health*. 2009;5(1):8.
21. Saidi Kapiga SH, Abdul Khalie Muhammad, Heidi Stöckl, Gerry Mshana, Ramadhan Hashim, Christian Hansen SL, Charlotte Watts. Prevalence of intimate partner violence and abuse and associated factors among women enrolled into a cluster randomised trial in northwestern Tanzania *BMC public health*. 2017.
22. Tegbar Yigzaw AY, Yigzaw Kebede. Domestic violence around Gondar in Northwest Ethiopia *Ethiopian journal of Health development* 2004;18(3):133-9.
23. Oram S, Trevillion K, Feder G, Howard L. Prevalence of experiences of domestic violence among psychiatric patients: systematic review. *The British Journal of Psychiatry*. 2013;202(2):94-9.
24. Khalifeh H, Oram S, Trevillion K, Johnson S, Howard LM. Recent intimate partner violence among people with chronic mental illness: findings from a national cross-sectional survey. *The British Journal of Psychiatry*. 2015;207(3):207-12.
25. González Cases J, Polo Usaola C, González Aguado F, López Gironés M, Rullas Trincado M, Fernández Liria A. Prevalence and Characteristics of Intimate Partner Violence Against Women with Severe Mental Illness: A Prevalence Study in Spain. *Community Mental Health Journal*. 2014;50(7):841-7.
26. Ali AA, Yassin K, Omer R. Domestic violence against women in Eastern Sudan. *BMC public health*. 2014;14(1):1136.
27. Ali TS, Asad N, Mogren I, Krantz G. Intimate partner violence in urban Pakistan: prevalence, frequency, and risk factors. *International journal of women's health*. 2011;3:105.
28. McCleary-Sills J, Namy S, Nyoni J, Rweyemamu D, Salvatory A, Steven E. Stigma, shame and women's limited agency in help-seeking for intimate partner violence. *Global public health*. 2016;11(1-2):224-35.
29. Metheny N, Stephenson R. Help Seeking Behavior among Women Who Report Intimate Partner Violence in Afghanistan: an Analysis of the 2015 Afghanistan Demographic and Health Survey. *Journal of Family Violence*. 2019;34(2):69-79.
30. Stöckl H PB. Intimate partner violence and its association with physical and mental health symptoms among older women in Germany. *Journal of Interpersonal Violence*. 2015;30(30):89-111.
31. Trevillion K, Oram S, Feder G, Howard LM. Experiences of domestic violence and mental disorders: a systematic review and meta-analysis. *PloS one*. 2012;7(12).

## List of figures

1  
2  
3  
4  
5  
6  
7  
8  
9  
10  
11  
12  
13  
14  
15  
16  
17  
18  
19  
20  
21  
22  
23  
24  
25  
26  
27  
28  
29  
30  
31  
32  
33  
34  
35  
36  
37  
38  
39  
40  
41  
42  
43  
44  
45  
46  
47  
48  
49  
50  
51  
52  
53  
54  
55  
56  
57  
58  
59  
60

1. Figure 1. Sampling schedule of the selection of women included in the study

For peer review only



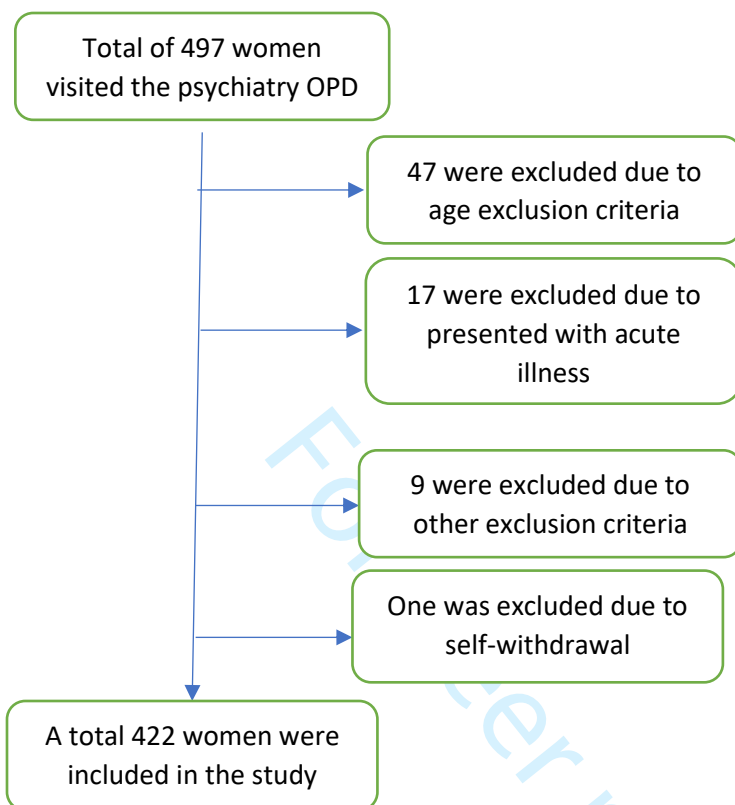

Figure 1 Sampling schedule of the selection of women included in the study

# Reporting checklist for cross sectional study.

Based on the STROBE cross sectional guidelines.

## Instructions to authors

Complete this checklist by entering the page numbers from your manuscript where readers will find each of the items listed below.

Your article may not currently address all the items on the checklist. Please modify your text to include the missing information. If you are certain that an item does not apply, please write "n/a" and provide a short explanation.

Upload your completed checklist as an extra file when you submit to a journal.

In your methods section, say that you used the STROBE cross sectional reporting guidelines, and cite them as:

von Elm E, Altman DG, Egger M, Pocock SJ, Gotsche PC, Vandenbroucke JP. The Strengthening the Reporting of Observational Studies in Epidemiology (STROBE) Statement: guidelines for reporting observational studies.

|                           |                                                                                                        | Page   |
|---------------------------|--------------------------------------------------------------------------------------------------------|--------|
|                           | Reporting Item                                                                                         | Number |
| <b>Title and abstract</b> |                                                                                                        |        |
| Title                     | <a href="#">#1a</a> Indicate the study's design with a commonly used term in the title or the abstract | 1      |

|    |                      |                     |                                                                 |   |
|----|----------------------|---------------------|-----------------------------------------------------------------|---|
| 1  | Abstract             | <a href="#">#1b</a> | Provide in the abstract an informative and balanced             | 2 |
| 2  |                      |                     | summary of what was done and what was found                     |   |
| 3  |                      |                     |                                                                 |   |
| 4  |                      |                     |                                                                 |   |
| 5  |                      |                     |                                                                 |   |
| 6  | <b>Introduction</b>  |                     |                                                                 |   |
| 7  |                      |                     |                                                                 |   |
| 8  |                      |                     |                                                                 |   |
| 9  |                      |                     |                                                                 |   |
| 10 | Background /         | <a href="#">#2</a>  | Explain the scientific background and rationale for the         | 3 |
| 11 | rationale            |                     | investigation being reported                                    |   |
| 12 |                      |                     |                                                                 |   |
| 13 |                      |                     |                                                                 |   |
| 14 |                      |                     |                                                                 |   |
| 15 | Objectives           | <a href="#">#3</a>  | State specific objectives, including any prespecified           | 4 |
| 16 |                      |                     | hypotheses                                                      |   |
| 17 |                      |                     |                                                                 |   |
| 18 |                      |                     |                                                                 |   |
| 19 |                      |                     |                                                                 |   |
| 20 | <b>Methods</b>       |                     |                                                                 |   |
| 21 |                      |                     |                                                                 |   |
| 22 |                      |                     |                                                                 |   |
| 23 | Study design         | <a href="#">#4</a>  | Present key elements of study design early in the paper         | 5 |
| 24 |                      |                     |                                                                 |   |
| 25 |                      |                     |                                                                 |   |
| 26 | Setting              | <a href="#">#5</a>  | Describe the setting, locations, and relevant dates, including  | 5 |
| 27 |                      |                     | periods of recruitment, exposure, follow-up, and data           |   |
| 28 |                      |                     | collection                                                      |   |
| 29 |                      |                     |                                                                 |   |
| 30 |                      |                     |                                                                 |   |
| 31 |                      |                     |                                                                 |   |
| 32 |                      |                     |                                                                 |   |
| 33 |                      |                     |                                                                 |   |
| 34 | Eligibility criteria | <a href="#">#6a</a> | Give the eligibility criteria, and the sources and methods of   |   |
| 35 |                      |                     | selection of participants.                                      |   |
| 36 |                      |                     |                                                                 |   |
| 37 |                      |                     |                                                                 |   |
| 38 |                      |                     |                                                                 |   |
| 39 |                      |                     |                                                                 |   |
| 40 |                      | <a href="#">#7</a>  | Clearly define all outcomes, exposures, predictors, potential   |   |
| 41 |                      |                     | confounders, and effect modifiers. Give diagnostic criteria, if |   |
| 42 |                      |                     | applicable                                                      |   |
| 43 |                      |                     |                                                                 |   |
| 44 |                      |                     |                                                                 |   |
| 45 |                      |                     |                                                                 |   |
| 46 |                      |                     |                                                                 |   |
| 47 | Data sources /       | <a href="#">#8</a>  | For each variable of interest give sources of data and details  | 6 |
| 48 | measurement          |                     | of methods of assessment (measurement). Describe                |   |
| 49 |                      |                     | comparability of assessment methods if there is more than       |   |
| 50 |                      |                     | one group. Give information separately for for exposed and      |   |
| 51 |                      |                     | unexposed groups if applicable.                                 |   |
| 52 |                      |                     |                                                                 |   |
| 53 |                      |                     |                                                                 |   |
| 54 |                      |                     |                                                                 |   |
| 55 |                      |                     |                                                                 |   |
| 56 |                      |                     |                                                                 |   |
| 57 |                      |                     |                                                                 |   |
| 58 |                      |                     |                                                                 |   |
| 59 |                      |                     |                                                                 |   |
| 60 |                      |                     |                                                                 |   |

|    |                |                      |                                                               |     |
|----|----------------|----------------------|---------------------------------------------------------------|-----|
| 1  | Bias           | <a href="#">#9</a>   | Describe any efforts to address potential sources of bias     | 5,6 |
| 2  |                |                      |                                                               |     |
| 3  |                |                      |                                                               |     |
| 4  | Study size     | <a href="#">#10</a>  | Explain how the study size was arrived at                     | 5   |
| 5  |                |                      |                                                               |     |
| 6  |                |                      |                                                               |     |
| 7  | Quantitative   | <a href="#">#11</a>  | Explain how quantitative variables were handled in the        | 6,7 |
| 8  | variables      |                      | analyses. If applicable, describe which groupings were        |     |
| 9  |                |                      | chosen, and why                                               |     |
| 10 |                |                      |                                                               |     |
| 11 |                |                      |                                                               |     |
| 12 |                |                      |                                                               |     |
| 13 |                |                      |                                                               |     |
| 14 |                |                      |                                                               |     |
| 15 | Statistical    | <a href="#">#12a</a> | Describe all statistical methods, including those used to     | 6,7 |
| 16 | methods        |                      | control for confounding                                       |     |
| 17 |                |                      |                                                               |     |
| 18 |                |                      |                                                               |     |
| 19 |                |                      |                                                               |     |
| 20 | Statistical    | <a href="#">#12b</a> | Describe any methods used to examine subgroups and            | 6,7 |
| 21 | methods        |                      | interactions                                                  |     |
| 22 |                |                      |                                                               |     |
| 23 |                |                      |                                                               |     |
| 24 |                |                      |                                                               |     |
| 25 |                |                      |                                                               |     |
| 26 | Statistical    | <a href="#">#12c</a> | Explain how missing data were addressed                       | N/A |
| 27 | methods        |                      |                                                               |     |
| 28 |                |                      |                                                               |     |
| 29 |                |                      |                                                               |     |
| 30 |                |                      |                                                               |     |
| 31 | Statistical    | <a href="#">#12d</a> | If applicable, describe analytical methods taking account of  | N/A |
| 32 | methods        |                      | sampling strategy                                             |     |
| 33 |                |                      |                                                               |     |
| 34 |                |                      |                                                               |     |
| 35 |                |                      |                                                               |     |
| 36 | Statistical    | <a href="#">#12e</a> | Describe any sensitivity analyses                             | N/A |
| 37 | methods        |                      |                                                               |     |
| 38 |                |                      |                                                               |     |
| 39 |                |                      |                                                               |     |
| 40 |                |                      |                                                               |     |
| 41 |                |                      |                                                               |     |
| 42 | <b>Results</b> |                      |                                                               |     |
| 43 |                |                      |                                                               |     |
| 44 |                |                      |                                                               |     |
| 45 | Participants   | <a href="#">#13a</a> | Report numbers of individuals at each stage of study—eg       | 7   |
| 46 |                |                      | numbers potentially eligible, examined for eligibility,       |     |
| 47 |                |                      | confirmed eligible, included in the study, completing follow- |     |
| 48 |                |                      | up, and analysed. Give information separately for for         |     |
| 49 |                |                      | exposed and unexposed groups if applicable.                   |     |
| 50 |                |                      |                                                               |     |
| 51 |                |                      |                                                               |     |
| 52 |                |                      |                                                               |     |
| 53 |                |                      |                                                               |     |
| 54 |                |                      |                                                               |     |
| 55 |                |                      |                                                               |     |
| 56 |                |                      |                                                               |     |
| 57 | Participants   | <a href="#">#13b</a> | Give reasons for non-participation at each stage              | N/A |
| 58 |                |                      |                                                               |     |
| 59 |                |                      |                                                               |     |
| 60 |                |                      |                                                               |     |

|    |                   |                      |                                                                   |          |
|----|-------------------|----------------------|-------------------------------------------------------------------|----------|
| 1  | Participants      | <a href="#">#13c</a> | Consider use of a flow diagram                                    |          |
| 2  |                   |                      |                                                                   |          |
| 3  |                   |                      |                                                                   |          |
| 4  | Descriptive data  | <a href="#">#14a</a> | Give characteristics of study participants (eg demographic,       | 7,8      |
| 5  |                   |                      | clinical, social) and information on exposures and potential      |          |
| 6  |                   |                      | confounders. Give information separately for exposed and          |          |
| 7  |                   |                      | unexposed groups if applicable.                                   |          |
| 8  |                   |                      |                                                                   |          |
| 9  |                   |                      |                                                                   |          |
| 10 |                   |                      |                                                                   |          |
| 11 |                   |                      |                                                                   |          |
| 12 |                   |                      |                                                                   |          |
| 13 |                   |                      |                                                                   |          |
| 14 | Descriptive data  | <a href="#">#14b</a> | Indicate number of participants with missing data for each        | N/A      |
| 15 |                   |                      | variable of interest                                              |          |
| 16 |                   |                      |                                                                   |          |
| 17 |                   |                      |                                                                   |          |
| 18 |                   |                      |                                                                   |          |
| 19 | Outcome data      | <a href="#">#15</a>  | Report numbers of outcome events or summary measures.             | 10,11,12 |
| 20 |                   |                      | Give information separately for exposed and unexposed             |          |
| 21 |                   |                      | groups if applicable.                                             |          |
| 22 |                   |                      |                                                                   |          |
| 23 |                   |                      |                                                                   |          |
| 24 |                   |                      |                                                                   |          |
| 25 |                   |                      |                                                                   |          |
| 26 |                   |                      |                                                                   |          |
| 27 | Main results      | <a href="#">#16a</a> | Give unadjusted estimates and, if applicable, confounder-         | 9,10     |
| 28 |                   |                      | adjusted estimates and their precision (eg, 95% confidence        |          |
| 29 |                   |                      | interval). Make clear which confounders were adjusted for         |          |
| 30 |                   |                      | and why they were included                                        |          |
| 31 |                   |                      |                                                                   |          |
| 32 |                   |                      |                                                                   |          |
| 33 |                   |                      |                                                                   |          |
| 34 |                   |                      |                                                                   |          |
| 35 |                   |                      |                                                                   |          |
| 36 |                   |                      |                                                                   |          |
| 37 | Main results      | <a href="#">#16b</a> | Report category boundaries when continuous variables were         | N/A      |
| 38 |                   |                      | categorized                                                       |          |
| 39 |                   |                      |                                                                   |          |
| 40 |                   |                      |                                                                   |          |
| 41 |                   |                      |                                                                   |          |
| 42 | Main results      | <a href="#">#16c</a> | If relevant, consider translating estimates of relative risk into | N/A      |
| 43 |                   |                      | absolute risk for a meaningful time period                        |          |
| 44 |                   |                      |                                                                   |          |
| 45 |                   |                      |                                                                   |          |
| 46 |                   |                      |                                                                   |          |
| 47 |                   |                      |                                                                   |          |
| 48 | Other analyses    | <a href="#">#17</a>  | Report other analyses done—e.g., analyses of subgroups            | 11,12    |
| 49 |                   |                      | and interactions, and sensitivity analyses                        |          |
| 50 |                   |                      |                                                                   |          |
| 51 |                   |                      |                                                                   |          |
| 52 |                   |                      |                                                                   |          |
| 53 | <b>Discussion</b> |                      |                                                                   |          |
| 54 |                   |                      |                                                                   |          |
| 55 |                   |                      |                                                                   |          |
| 56 | Key results       | <a href="#">#18</a>  | Summarise key results with reference to study objectives          | 12       |
| 57 |                   |                      |                                                                   |          |
| 58 |                   |                      |                                                                   |          |
| 59 |                   |                      |                                                                   |          |
| 60 |                   |                      |                                                                   |          |

|    |                          |                     |                                                                |    |
|----|--------------------------|---------------------|----------------------------------------------------------------|----|
| 1  | Limitations              | <a href="#">#19</a> | Discuss limitations of the study, taking into account sources  | 24 |
| 2  |                          |                     | of potential bias or imprecision. Discuss both direction and   |    |
| 3  |                          |                     | magnitude of any potential bias.                               |    |
| 4  |                          |                     |                                                                |    |
| 5  |                          |                     |                                                                |    |
| 6  |                          |                     |                                                                |    |
| 7  |                          |                     |                                                                |    |
| 8  |                          |                     |                                                                |    |
| 9  | Interpretation           | <a href="#">#20</a> | Give a cautious overall interpretation considering objectives, | 24 |
| 10 |                          |                     | limitations, multiplicity of analyses, results from similar    |    |
| 11 |                          |                     | studies, and other relevant evidence.                          |    |
| 12 |                          |                     |                                                                |    |
| 13 |                          |                     |                                                                |    |
| 14 |                          |                     |                                                                |    |
| 15 |                          |                     |                                                                |    |
| 16 | Generalisability         | <a href="#">#21</a> | Discuss the generalisability (external validity) of the study  | 2  |
| 17 |                          |                     | results                                                        |    |
| 18 |                          |                     |                                                                |    |
| 19 |                          |                     |                                                                |    |
| 20 |                          |                     |                                                                |    |
| 21 |                          |                     |                                                                |    |
| 22 | <b>Other Information</b> |                     |                                                                |    |
| 23 |                          |                     |                                                                |    |
| 24 |                          |                     |                                                                |    |
| 25 | Funding                  | <a href="#">#22</a> | Give the source of funding and the role of the funders for the | 15 |
| 26 |                          |                     | present study and, if applicable, for the original study on    |    |
| 27 |                          |                     | which the present article is based                             |    |
| 28 |                          |                     |                                                                |    |
| 29 |                          |                     |                                                                |    |
| 30 |                          |                     |                                                                |    |
| 31 |                          |                     |                                                                |    |
| 32 |                          |                     |                                                                |    |

33 None The STROBE checklist is distributed under the terms of the Creative Commons Attribution  
34 License CC-BY. This checklist can be completed online using <https://www.goodreports.org/>, a tool  
35 made by the [EQUATOR Network](#) in collaboration with [Penelope.ai](#)  
36  
37  
38  
39  
40  
41  
42  
43  
44  
45  
46  
47  
48  
49  
50  
51  
52  
53  
54  
55  
56  
57  
58  
59  
60

# BMJ Open

**Intimate partner violence among reproductive-age women with chronic mental illness attending a psychiatry outpatient department: cross-sectional facility-based study, Addis Ababa, Ethiopia**

|                                 |                                                                                                                                                                                                                                                                                                                                               |
|---------------------------------|-----------------------------------------------------------------------------------------------------------------------------------------------------------------------------------------------------------------------------------------------------------------------------------------------------------------------------------------------|
| Journal:                        | <i>BMJ Open</i>                                                                                                                                                                                                                                                                                                                               |
| Manuscript ID                   | bmjopen-2020-045251.R2                                                                                                                                                                                                                                                                                                                        |
| Article Type:                   | Original research                                                                                                                                                                                                                                                                                                                             |
| Date Submitted by the Author:   | 20-Sep-2021                                                                                                                                                                                                                                                                                                                                   |
| Complete List of Authors:       | Zerihun, Tigist; St Paul's Hospital Millennium Medical College, Psychiatry<br>Tsfaye, Markos; St Paul's Hospital Millennium Medical College, Psychiatry<br>Deyessa, Negussie; Addis Ababa University College of Health Sciences, Public Health<br>Bekele, Delayehu ; St Paul's Hospital Millennium Medical College, Obstetrics and gynecology |
| <b>Primary Subject Heading</b>: | Mental health                                                                                                                                                                                                                                                                                                                                 |
| Secondary Subject Heading:      | Global health                                                                                                                                                                                                                                                                                                                                 |
| Keywords:                       | Schizophrenia & psychotic disorders < PSYCHIATRY, PUBLIC HEALTH, Reproductive medicine < GYNAECOLOGY, MENTAL HEALTH                                                                                                                                                                                                                           |
|                                 |                                                                                                                                                                                                                                                                                                                                               |

SCHOLARONE™  
Manuscripts



I, the Submitting Author has the right to grant and does grant on behalf of all authors of the Work (as defined in the below author licence), an exclusive licence and/or a non-exclusive licence for contributions from authors who are: i) UK Crown employees; ii) where BMJ has agreed a CC-BY licence shall apply, and/or iii) in accordance with the terms applicable for US Federal Government officers or employees acting as part of their official duties; on a worldwide, perpetual, irrevocable, royalty-free basis to BMJ Publishing Group Ltd ("BMJ") its licensees and where the relevant Journal is co-owned by BMJ to the co-owners of the Journal, to publish the Work in this journal and any other BMJ products and to exploit all rights, as set out in our [licence](#).

The Submitting Author accepts and understands that any supply made under these terms is made by BMJ to the Submitting Author unless you are acting as an employee on behalf of your employer or a postgraduate student of an affiliated institution which is paying any applicable article publishing charge ("APC") for Open Access articles. Where the Submitting Author wishes to make the Work available on an Open Access basis (and intends to pay the relevant APC), the terms of reuse of such Open Access shall be governed by a Creative Commons licence – details of these licences and which [Creative Commons](#) licence will apply to this Work are set out in our licence referred to above.

Other than as permitted in any relevant BMJ Author's Self Archiving Policies, I confirm this Work has not been accepted for publication elsewhere, is not being considered for publication elsewhere and does not duplicate material already published. I confirm all authors consent to publication of this Work and authorise the granting of this licence.



1  
2  
3 **Intimate partner violence among reproductive-age women with chronic mental illness**  
4  
5 **attending a psychiatry outpatient department: cross-sectional facility-based study,**  
6  
7  
8 **Addis Ababa, Ethiopia**  
9

10 Tigist Zerihun<sup>1\*</sup>, Markos Tesfaye<sup>1</sup>, Negussie Deyessa<sup>2</sup>, Delayehu Bekele<sup>3</sup>  
11  
12  
13  
14  
15

- 16 1. Department of Psychiatry, St Paul's Hospital Millennium Medical College, Addis  
17 Ababa, Ethiopia  
18  
19 2. Addis Ababa University, School of Public Health, Addis Ababa, Ethiopia  
20  
21 3. Department of Obstetrics and Gynaecology, St Paul's Hospital Millennium Medical  
22 College, Addis Ababa, Ethiopia  
23  
24  
25  
26  
27  
28  
29

30 **\*Corresponding Author**  
31

32  
33 Tigist Zerihun\* (MD, MPHIL)  
34

35  
36 Email: [zerukaye@gmail.com](mailto:zerukaye@gmail.com); [tigsist.zerihun@sphmmc.edu.et](mailto:tigsist.zerihun@sphmmc.edu.et)  
37

38  
39 Prof Markos Tesfaye (MD, PHD)  
40

41  
42 Email: [markostesfaye92@gmail.com](mailto:markostesfaye92@gmail.com); [markos.tesfaye@sphmmc.edu.et](mailto:markos.tesfaye@sphmmc.edu.et)  
43  
44

45 Dr. Negussie Deyessa (MD, PHD)  
46

47  
48 Email: [negdaysun@gmail.com](mailto:negdaysun@gmail.com), [negussie.deyessa@aau.edu.et](mailto:negussie.deyessa@aau.edu.et)  
49  
50

51 Dr. Delayehu Bekele (MD, MPH)  
52

53  
54 Email: [delayehu@gmail.com](mailto:delayehu@gmail.com), [delayehu.bekele@sphmmc.edu.et](mailto:delayehu.bekele@sphmmc.edu.et)  
55  
56

57 **Word count** 2970  
58  
59  
60

## Abstract

**Objective:** To determine the prevalence of intimate partner violence (IPV), and associated factors, in reproductive-aged women attending psychiatric outpatient departments (OPD).

**Design:** Cross-sectional facility-based study

**Setting:** Outpatient psychiatric clinics of public hospitals in Addis Ababa.

**Participants:** Reproductive aged women with chronic mental illness who attended follow-up in psychiatric outpatient clinics.

**The primary and secondary outcome measures:** The data were collected using a multi-culturally validated instrument from randomly sampled women with chronic mental illness. Multiple logistic regression was used to identify factors independently associated with IPV. Ethical clearance was obtained from the institutional ethics review board of St. Paul's Hospital Millennium Medical College.

**Result:** Four hundred and twenty-two women who were attending the psychiatric outpatient clinics took part in the study. The majority of participants 62.0% (95% CI: 56.1, 68.8) experienced IPV at least once in their lifetime. The most common form of IPV experienced by women was emotional violence [60%; 95% CI: 55.0, 64.7]. One hundred eighty-six [44.1%; (95% CI: 39.3, 48.8)] respondents experienced physical or sexual violence during the last year. A history of divorce [AOR= 5.64; 95% CI: 2.75, 11.56] and having a mental illness for more than five years [AOR= 2.23; 95%CI: 1.26, 3.93] were associated with any form of IPV.

**Conclusion:** The high prevalence of IPV among women attending psychiatric outpatient services highlights the need to routinely inquire about IPV and develop effective strategies to prevent it among this vulnerable group.

1  
2  
3 **Keywords: Intimate partner violence, Psychiatric outpatient, Mental illness**  
4  
5  
6  
7

8  
9 **Strengths and limitations of this study**  
10

- 11  
12 • There is scarce research on intimate partner violence among women with chronic mental  
13 illness in Ethiopia specifically, and Africa more generally.  
14  
15  
16 • We used a standard questionnaire validated for multiple countries, which allows direct  
17 comparison of our findings with other available data.  
18  
19  
20  
21 • As a cross-sectional study, our data do not imply causality and cannot inform as to the  
22 temporal relationships between the variables.  
23  
24  
25  
26 • Data were self-reported, which may be limited by recall bias and underreporting; men  
27 were not investigated to understand the magnitude and reason for engaging in violence against  
28 their partners. The study was conducted among women thought to have better access to  
29 information, so the findings may not be generalisable to women with mental illness who do not  
30 attend psychiatric tertiary care facilities.  
31  
32  
33  
34  
35  
36  
37  
38  
39  
40  
41  
42  
43  
44  
45  
46  
47  
48  
49  
50  
51  
52  
53  
54  
55  
56  
57  
58  
59  
60

## Introduction

Intimate partner violence (IPV) among women is a common phenomenon globally (1). According to the WHO definition, IPV includes emotional abuse, physical, sexual violence or controlling behaviour between current and ex-partners (2). Up to this time, research on IPV has largely focused on experiences of physical violence than the emotional and sexual aspects (3). Nevertheless, one-third of women globally report having experienced IPV at some point in their lifetime (4).

Studies reported considerable contextual variation in the prevalence of IPV (5). In the World Health Organisation's multi-site study, the prevalence of intimate violence in women ranged from 15% to 72.7% and 4%–54% in their lifetime and the past year, respectively (6). In the same study, Japan (15%) and Ethiopia (72.7%) are countries that reported the lowest and highest physical or sexual violence against women reported, respectively. (6). Another Ethiopian study has also reported a 30% prevalence among ever-married women (7). Different factors may play a role in precipitating and maintaining IPV worldwide such as marital status, education, wealth, cultural factors and mental health status (7-10).

The link between IPV and poor mental and physical health of women have been indicated in many studies (11). IPV is associated with substantial morbidity and mortality, specifically among women, and its prevention has a major global public health importance (12, 13). Women who experienced IPV have more medical, gynecologic, and stress-related symptoms than those who did not (12, 14).

There is also robust evidence that women with chronic mental illness (CMI) experience higher rates of violence than women without chronic mental illness (14). Also, IPV is an established risk factor for mental health problems, including Major depression, suicide attempts and post

1  
2  
3 traumatic stress disorder (PTSD) (15-17). In addition to being at higher risk of experiencing  
4 different types of IPV ( physical emotional and sexual), CMI's - such as severe major depressive  
5 disorder, bipolar disorder, and schizophrenia hinder women's capacity to protect themselves and  
6 seek help when compared to women without CMI (13, 17). Furthermore, a history of experience  
7 of IPV is associated with poorer health, including depression, post-traumatic stress disorder,  
8 anxiety, and significant impairment in functionality and somatic health (11, 15, 17). A study from  
9 Ethiopia found that IPV, including spousal controlling behaviour associated with depression(18).  
10 Similarly, studies from Europe, the United States and China also reported an association between  
11 mental illness and IPV(19, 20). Nevertheless, evidence is scarce about the prevalence of IPV  
12 among reproductive-age women with CMI living in resource-poor settings.  
13  
14  
15  
16  
17  
18  
19  
20  
21  
22  
23  
24  
25

26 Data on IPV prevalence and its associated factors among women with CMI is essential for  
27 developing effective interventions in this targeted vulnerable group. Therefore, we aimed to  
28 investigate the prevalence of IPV and associated factors among women with CMI in Ethiopia.  
29  
30  
31  
32  
33  
34  
35  
36

## 37 **Methods**

### 38 **Study setting and design**

39  
40 Institutional-based cross-sectional study design was undertaken in public hospitals in Addis  
41 Ababa, Ethiopia. The city has an estimated population of 3.2 million (21).  
42  
43  
44

45 The study was conducted between December 2016 and May 2017 in four outpatient clinics at  
46 public tertiary hospitals that deliver specialised mental health services by psychiatrists or  
47 psychiatric residents.  
48  
49  
50  
51  
52  
53  
54

### 55 **Determination of sample size**

1  
2  
3 The sample size was determined using the following assumptions: the prevalence of IPV among  
4 women with CMI (schizophrenia, bipolar disorder and severe major depression) (P=50%) at 95%  
5 confidence level,  $Z = 1.96$  and  $d =$  the level of precision (0.05), and adding for non-response of  
6  
7  
8  
9  
10 10 %; this gave a required sample size of  $n= 423$ .

### 11 12 13 **Sampling procedure**

14  
15 The study subjects were recruited from psychiatric outpatient clinics of the four hospitals. All  
16 women aged 18-49 years who provided consent and presented in the study period were included.  
17  
18 To recruit the study subjects, 497 women patients were invited to participate, of which 47 (9.5%)  
19  
20 patients were excluded due to their age was below 18 years or were never in a marital  
21  
22 relationship, 16 (3.2%) were excluded due to their presentation with acute psychosis, the  
23  
24 remaining 9 (1.8%) patients were due to other exclusion criteria, and only one patient was  
25  
26 excluded due to a self withdrawal to participate. Finally, the study included 422 study participants  
27  
28  
29  
30  
31  
32 (Figure 1).

### 33 34 35 36 37 **Data Collection and instrument**

38  
39 An interviewer-administered structured questionnaire was used to collect the data. The  
40  
41 standardised pre-tested Amharic version (Amharic is the national language of Ethiopia) of a  
42  
43 multi-culturally validated IPV tool from the World Health Organization (WHO) was employed  
44  
45 to gather information on IPV, such as sexual, physical and emotional abuse (6).  
46  
47  
48

49 Sociodemographic characteristics and disease-related characteristics of the participants were  
50  
51 also assessed. Women who had experienced IPV were further asked to qualify for the type of  
52  
53 experience and the timing, i.e., whether it was in the previous twelve months or not.  
54  
55  
56

1  
2  
3 Additionally, the questions on spousal control over the respondent were adopted and used to  
4  
5 measure and categorise with different list of items in which a woman can act without the  
6  
7 consent of her husband /partner, including her healthcare-related activities.  
8  
9

10 The final Amharic version of the questionnaire was administrated by trained, experienced female  
11  
12 psychiatric nurses who aimed to be respectful, non-judgmental and enable the women to feel at  
13  
14 ease. An exit interview was conducted after each participant's follow-up visit was complete. All  
15  
16 participants were fluent Amharic speakers.  
17  
18

19  
20 To ensure the quality of the data, a structured questionnaire was pretested among five per cent of  
21  
22 study participants across different psychiatric outpatient clinics. Detailed discussion was held with  
23  
24 the researchers, supervisors and data collectors after the pertest and necessary amendments were  
25  
26 done. The supervisors and data collectors were trained over the course of three days. Supervisors  
27  
28 checked the collected data on the same day for completeness and consistency.  
29  
30  
31  
32  
33  
34  
35

### 36 **Analysis**

37  
38 In order to analyze the data, Epi Data 3.1 was used for entry and cleaning, followed by  
39  
40 exporting to SPSS version 20.  
41  
42

43 The sociodemographic characteristics and experiences of IPV were summarised using  
44  
45 descriptive statistics. The outcome variable was any IPV as the categorical variable of 'yes' or  
46  
47 'no'. predictor variables: Marital status (single, married, divorced, widowed), educational level  
48  
49 (above high school, high school, elementary school, illiterate or no education), occupation  
50  
51 (Unemployed, Housewives/Student, Daily labourer / Housemaid, Formal employment)  
52  
53  
54  
55  
56  
57  
58  
59  
60

1  
2  
3 To investigate the associations between participants' characteristics and IPV, we used bivariate  
4 analyses. We used a  $P < 0.05$  significance level for multiple logistic regression analysis following  
5 bivariate analysis, which calculated crude odds ratios and confidence intervals. 05.  
6  
7  
8  
9

### 10 **Ethical considerations**

11  
12  
13 The study protocol was reviewed and approved by from the institutional ethics review board of  
14 St. Paul's Hospital Millennium Medical College. Written informed consent was obtained from  
15 participant is informed in detail about the study objectives and possible risks, and the benefits of  
16 the study before being enrolled. An experienced psychiatric nurse completed a structured  
17 assessment of the person's capacity to consent to participate in the study. Participants were  
18 informed about their right to participate only on a voluntary basis and to withdraw from the study  
19 without providing any explanation. All collected information was anonymized, and the privacy of  
20 the participants was respected in the data collection process analysis, interpretation and write up.  
21 Participants who needed any psychological or safety support during the data collection were  
22 referred for treatment and safety support. No reimbursement or payment was made for  
23 participants.  
24  
25  
26  
27  
28  
29  
30  
31  
32  
33  
34  
35  
36  
37  
38

### 39 **Public and patient involvement**

40  
41 Neither the public nor patients were involved in the study survey design. The findings will be  
42 provided for participants based on their requests. The community will be consulted as part of the  
43 design and implementation of any studies that can be built on this initial study.  
44  
45  
46  
47  
48  
49

## 50 **Results**

### 51 **Sociodemographic characteristics of respondents**

52  
53  
54  
55  
56  
57  
58  
59  
60



Four hundred twenty-three reproductive age women were approached and participated, resulting in an 99.8% response rate. The mean age of respondents was  $32.1 \pm 6.7$  years, with a range of 18 to 46. A third (32.9%; n=139) of the participants weren't married legally. Approximately four out of ten women are illiterate (have no formal education) or have only a primary school education. Only 27 % of women were employed. (Table 1). The majority (80%) of the participants had a diagnosis of mental illness for more than one year. A significant proportion of the participants, 46.3%, n=156, lived with the illness for more than five years.

Table 1. Participant characteristics by demographics and clinical characteristics (n=422)

| Characteristics                        | Frequency | Percentage |
|----------------------------------------|-----------|------------|
| <25                                    | 63        | 14.9       |
| 25-34                                  | 186       | 44.1       |
| >35                                    | 173       | 41.0       |
| <b>Marital status</b>                  |           |            |
| Single                                 | 139       | 32.9       |
| Married                                | 187       | 44.3       |
| Widowed                                | 26        | 6.2        |
| Divorced                               | 70        | 16.6       |
| <b>Number of alive children</b>        |           |            |
| >2                                     | 180       | 42.7       |
| 1-2                                    | 84        | 19.9       |
| No children                            | 158       | 37.4       |
| <b>Education</b>                       |           |            |
| Tertiary level                         | 60        | 14.2       |
| Secondary level (high school)          | 195       | 46.2       |
| Primary level                          | 123       | 29.2       |
| Illiterate                             | 44        | 10.4       |
| <b>Diagnosis</b>                       |           |            |
| Schizophrenia                          | 170       | 40.3       |
| Bipolar disorder                       | 116       | 27.5       |
| Major depressive disorder              | 136       | 32.2       |
| <b>Psychotropic medication</b>         |           |            |
| Antipsychotics                         | 208       | 49.3       |
| Mood stabiliser                        | 67        | 15.9       |
| Antidepressant                         | 147       | 34.8       |
| <b>Duration of treatment in months</b> |           |            |
| 1-24                                   | 163       | 38.6       |
| 25-48                                  | 91        | 21.6       |
| 49 months and above                    | 168       | 39.8       |

| Occupation               |     |      |
|--------------------------|-----|------|
| No Job                   | 160 | 37.9 |
| Housewives/students      | 93  | 22.1 |
| Housemaid /Daily laborer | 55  | 13.0 |
| Employed (Formal)        | 114 | 27.0 |

## Lifetime prevalence

In this study, IPV was found to be prevalent in 62.0% [95% CI: 56.1, 68.8] of women in their lifetimes. The commonest form of IPV experienced by women was emotional abuse (60%; CI:95% CI: 55.0, 64.7) while 38.6% [ 95% CI:34.1,43.6] of participants experienced some kind of physical violence in their lifetime. Among participants who reported physical violence, a significant proportion, 25.6% [ 95% CI:21.6,29.6], reported severe forms of physical violence. The common form of severe physical violence was being beaten by fist on the face 21.8% [95% CI:17.3,25.6] followed by 13% [ 95% CI:9.7,16.1] getting kicked in different parts of the body. Three percent or more of the women who experienced physical violence foresaw incontinence, bleeds, fractures, or loss of consciousness. Only 2% of participants sought medical service for the incident. Moreover, 38 [95% CI:28.7,47.2] % of women who experienced severe physical violence reported that the incident occurred while pregnant.

Regarding sexual violence, nearly one third 31.3% [95% CI:26.8, 36.0] of the study participants reported ever experiencing any form of sexual violence, and 25.1% [95% CI:20.9,29.1] reported that their partner had compelled them to have sex.

More than one-third of all respondents, 36.2%; [95% CI:31.3, 41.0], had at least one pregnancy after they received the diagnosis of mental illness. Of these, 58.1%; [95% CI:53.1, 62.3] pregnancies were unintended, and 53.9% [45.3,63.3] of which ended up in induced abortion. In

1  
2  
3 29% [95% CI: 21.1,35.9] of these pregnancies arising from forced sexual intercourse, the women  
4  
5 resorted to induced abortion and terminated the pregnancy. Additionally, a third of participants  
6  
7 had sexual intercourse before 18 years of age, putting them at an increased risk of teenage  
8  
9 pregnancy.  
10  
11  
12  
13  
14  
15

### 16 **Twelve months of prevalence**

17  
18 Among women who participated in this survey, 44.1% [95% CI: 39.3, 48.8], 35.3% [95%  
19  
20 CI:31.0,40.3] and 25.1% [95% CI:21.3,29.9] reported to have experienced sexual and physical  
21  
22 violence within the last one year preceding the interview, respectively. Of those who reported  
23  
24 physical violence, 95% [ 95% CI:91.3,98.0] of them said this was severe, i.e., being hit with a  
25  
26 fist or object on the face. Two per cent of them were able to get treatment, and the other two per  
27  
28 cent spent a night in the hospital for the damage due to the physical attack by their male partner.  
29  
30 A significant statical difference was not observed in the prevalence of IPV among women by the  
31  
32 psychiatric diagnosis.  
33  
34  
35  
36

### 37 **Emotional violence and spousal control**

38  
39  
40 Almost 60 % of participants had experienced moderate 25.0% [95% CI:21.2,29.3] or severe  
41  
42 34.8% [95% CI:30.0,39.0] forms of emotional violence, and higher than 92% [95% CI:90.0,95.3]  
43  
44 were either limited in what they could do or required permission in order to do it by their spouses  
45  
46 in their lifetime. More than 70% [95% CI:67.1,95.3] of participants would not visit healthcare  
47  
48 facilities for treatment without getting approval from their partner (Table 2).  
49  
50  
51  
52  
53  
54  
55  
56  
57  
58  
59  
60

Table 2: Spousal control among participants

| Types of spousal control                                                                      | Never N (%) | Yes N (%)  |
|-----------------------------------------------------------------------------------------------|-------------|------------|
| Have you ever been prohibited not to meet your friend by your partner?                        | 210 (49.8%) | 212(50.2%) |
| Does your partner make a restrict /limit limitation on your contact with your family?         | 234(55.5%)  | 188(44.5%) |
| Does your partner make sure you always know where you are; always want to know where you are? | 189(44.8%)  | 233(55.2%) |
| Does your partner ignore or treats you indifferently?                                         | 153(36.3%)  | 269(63.7%) |
| Does your partner become annoyed when you talk with other men?                                | 113(26.8%)  | 309(73.2%) |
| Does your partner often accuse you of being unfaithful?                                       | 148(35.1%)  | 274(64.9%) |
| Does your partner want to ask him permission when you go out from home?                       | 117(27.9%)  | 303(72.1%) |
| Does your partner want you to ask him permission before visiting the health care service?     | 121(28.7%)  | 300(71.3%) |
| Does your partner force you not to express your feeling to other people?                      | 192(45.5%)  | 230(54.5%) |

### Factors associated with IPV

The logistic regression model showed marital status, occupation, duration of illness and spousal control were significantly associated with IPV (Table 3). There was a significantly higher prevalence of physical and/or sexual violence among women without jobs [AOR=2.35; 95% CI, 1.23, 4.41], daily labourers or housemaids [AOR=3.33; 95% CI, 1.45, 7.61] compared to employed women. Moreover, the odds ratio of IPV was higher among divorced women [AOR=4.97; 95% CI, 2.36, 10.45] and non-married women [AOR=3.56; 95% CI, 2.09, 6.04] compared to currently married women. The study also depicted those women diagnosed with mental illness more than five years ago were more likely to experience IPV than newly

diagnosed [AOR=2.11; 95% CI, 1.17, 3.82]. However, the study did not find a difference in IPV experienced by the level of income or educational status (Table 3).

Table 3. Intimate partner violence and associated factors among study participants

| Characteristics             | IPV       |           | COR (95% CI)     | AOR (95%CI)              |
|-----------------------------|-----------|-----------|------------------|--------------------------|
|                             | Yes N (%) | No N (%)  |                  |                          |
| Income                      |           |           |                  |                          |
| Yes                         | 165(67.6) | 79(32.4)  | 1.67(1.12,2.48)  | 1.08(0.64,1.82)          |
| No                          | 99(55.6)  | 79(44.4)  | 1                | 1                        |
| Occupation                  |           |           |                  |                          |
| Unemployed                  | 117(73.1) | 43(26.9)  | 2.63(1.58,4.36)  | <b>2.35 (1.23,4.41)</b>  |
| House wives/Student         | 46(49.5)  | 47(50.5)  | 0.94(0.55,1.63)  | 1.49(0.77,2.88)          |
| Daily labourer / House maid | 43(78.2)  | 12(21.8)  | 3.46(1.65,7.24)  | <b>3.33 (1.45, 7.61)</b> |
| Formal employment           | 58(50.9)  | 56(49.1)  | 1                | 1                        |
| Marital status              |           |           |                  |                          |
| Married                     | 83(44.4)  | 104(55.6) | 1                | 1                        |
| Divorced                    | 59(84.3)  | 11(15.7)  | 6.72(3.32,13.60) | <b>4.97(2.36,10.45)</b>  |
| Widowed                     | 16(61.5)  | 10(38.5)  | 2.05(0.86,4.64)  | 1.74(0.72,4.19)          |
| Single                      | 106(76.3) | 33(23.7)  | 4.03(2.48,6.54)  | <b>3.56(2.09, 6.04)</b>  |
| Education                   |           |           |                  |                          |
| Beyond High school          | 35(58.3)  | 25(41.7)  | 1                | 1                        |
| High school                 | 124(63.6) | 71(36.4)  | 1.25(0.69,2.25)  | 0.96(0.49,1.86)          |
| Elementary                  | 76(61.3)  | 48(38.7)  | 1.13(0.60,2.12)  | 0.86(0.40,1.83)          |
| Illiterates (No education)  | 29(67.4)  | 14(32.6)  | 1.48(0.65,3.36)  | 1.38(0.54,3.56)          |
| Duration of illness         |           |           |                  |                          |
| Less than 1 year            | 41(48.2)  | 44(51.8)  | 1                | 1                        |
| 1 – 5 years                 | 87(58.4)  | 62(41.6)  | 1.50(0.88,2.57)  | 1.25(0.69,2.26)          |
| >5years                     | 136(72.3) | 52(27.7)  | 2.81(1.649,4.78) | <b>2.11(1.17, 3.82)</b>  |

## Discussion

Despite high prevalence reports of IPV in community-based studies in Ethiopia, no study focused on women with chronic mental illness. In this study, we found a high lifetime prevalence and recent IPV in this vulnerable group of the population.

A significant proportion (62%) of women conveyed experiences of IPV in their lifetime, which occurred quite frequently, signifying that this is a common experience of women with chronic mental illness. This finding is similar to a previous study from rural Ethiopia, which reported 60.7% violence against people with CMI (22). Likewise, the finding of IPV in this study is as high as a WHO community prevalence study report from Ethiopia, which is 72% (18), and Tanzanian study (61%) (23). Our findings are also higher than a community study in northern Ethiopia (24) and a report from a systematic review suggesting a prevalence of 33% IPV among women with CMI attending outpatient clinic(25). The difference can be explained by study population differences; the participants of the northern Ethiopian study were women in a rural community, while our study participants were urban residents and had higher educational levels. This study also reported (44%) recent IPV, which is higher than studies from high-income countries, such as 21% reporting IPV in the last twelve months from the UK (26) and 30.3 % in Spain (27). This is consistent with the assertion that women with CMI constitute a vulnerable segment of the population who need special protection (9). Health care providers should investigate about all types of recent IPV among reproductive age women with CMI.

The prevalence of physical violence was also found to be high in this study (38.5%), and this is comparable with other results from some African (28) and South Asian countries (29). However, our finding is lower than the prevalence reported from rural Ethiopia (18), which may be due to underreporting by our study participants who might be more dependent on their partners for

1  
2  
3 support towards the care of their mental illness. Physical violence is an important psychosocial  
4 issue with detrimental effects on the course of the pre-existing mental illness hence contributing  
5 to gender disparities in the treatment outcomes of CMI. Additionally, our study found that IPV  
6 is associated with a longer duration of illness. Similarly, another Ethiopian study found  
7 association between IPV and depression (18).  
8  
9

10  
11  
12  
13  
14  
15 Despite a significant number of participants who reported physical violence in this study, only a  
16 small proportion sought health care for their injuries. This is consistent with the low level of help-  
17 seeking behaviour for IPV related injuries as reported by other studies in Ethiopia and other  
18 global studies (5, 30, 31). A varying degree of emotional violence was also reported in 60% of  
19 participants, consistent with findings from Tanzania (23). It also has a significant association  
20 with poor mental health, as reported by other African countries (23, 32, 33).  
21  
22  
23  
24  
25  
26  
27  
28

29  
30 This study found that violence and spousal control are common concerns in relation to the human  
31 rights and well-being of women with CMI. We found that violence in the form of physical  
32 violence was associated with violence in other forms; this is consistent with research that has  
33 found that physical violence is frequently related to sexual or and psychological coercion. Mental  
34 health care providers need to routinely inquire about IPV during outpatient visits to offer  
35 appropriate interventions. Our study had not found an association between IPV and women's  
36 education, which contrasts with a previous study from Sudan (28).  
37  
38  
39  
40  
41  
42  
43  
44  
45

46  
47 Despite the limitations of this research, which included being a hospital-based study, purely  
48 urban sample and cultural bias of reporting, we have attempted to minimise non-disclosure in our  
49 methods. Such non-disclosure may link in with cultural taboos in relation to the topic. However,  
50 we used experienced, female psychiatric nurses do the interviews in order to prevent any  
51 discomfort to participants, and to try to minimise risk of non-disclosure. We believe that the  
52  
53  
54  
55  
56  
57

1  
2  
3 current study's findings will help other researchers further investigate the observed relationships  
4 of IPV and CMI through longitudinal studies with larger samples and the effect of these  
5 experiences on the prognosis of their mental illness. As a preventive strategy of IPV, continuous  
6 research is recommended to reduce the burden of chronic mental illness. IPV was associated with  
7 being unemployed or daily labourer/housemaid status in this study which is consistent with the  
8 WHO multi-site study, which found employment as a protective factor (6). in comparison,  
9 findings from other sub-Saharan African countries are not consistent (34, 35). This can be  
10 explained by cultural differences and study settings. However, causation cannot be established  
11 in our study due to the cross-sectional study design. Further studies are required to develop  
12 interventions intended at reducing IPV among women with CMI and test their effectiveness.  
13 Even though the participation was voluntary, the fact that no woman declined to participate in  
14 this study adds to the strengths of our findings.

## 31 **Conclusions**

32  
33  
34 IPV was found to be highly prevalent among women with chronic mental illness living in urban  
35 settings in Ethiopia. Given the detrimental effect of IPV on mental health, it may contribute to  
36 disparities in CMI clinical outcomes and quality of life among female patients. In addition,  
37 unemployment and a longer duration of CMI are associated with a higher prevalence of IPV.  
38

39  
40  
41 Psychiatric outpatient clinics are an essential point of contact for women with mental illness who  
42 are experiencing IPV. The treatment for mental disorders needs to include effective interventions  
43 for women who are also IPV victims. Mental health professionals play a key role in addressing  
44 IPV in this population.  
45  
46  
47  
48  
49  
50  
51  
52  
53  
54  
55  
56  
57  
58  
59  
60



## Acknowledgements

We wish to thank all study participants and their caregivers who accompanied them to the Hospitals, supervisors and data collectors for their time and commitment to the study.

## Author Contributors

We declare that all authors have made substantial contributions. TZ, MT, ND and DB conceptualise conceived the study, developed the design. TZ and ND collected and managed data. TZ, ND and DB performed the preliminary data analysis. TZ and MT performed the final data analysis. All authors contributed to the interpretation of results. TZ drafted the manuscript, and all authors contributed to critical revisions of the manuscript. Finally, all authors read and approved the final manuscript.

**Funding:** This study was supported by St Paul's Hospital Millennium Medical College. Grant number 001 /2016. The funder had no role in study design, data collection and analysis, decision to publish, or manuscript preparation.

**Competing interest,** the authors declare that they have no competing interests.

## Data availability statement

1  
2  
3 The authors confirm that the availability of data. Dataset is not publicly available at this point  
4  
5 because it contains sensitive information. The data that support the findings of this study are  
6  
7 available from the corresponding author, [TZ], upon reasonable request.  
8  
9

### 10 **Consent for publication**

11  
12  
13 Not applicable.  
14  
15

### 16 **Ethics statement**

17  
18  
19 This project has been approved by the Millennium Medical College Institutional Ethics Review  
20  
21 Board at St. Paul's Hospital (Ref. 001/2016).  
22  
23  
24  
25  
26  
27  
28  
29  
30  
31  
32  
33  
34  
35  
36  
37  
38  
39  
40  
41  
42  
43  
44  
45  
46  
47  
48  
49  
50  
51  
52  
53  
54  
55  
56  
57  
58  
59  
60

## Reference

1. Miller E, McCaw B. Intimate partner violence. *New England Journal of Medicine*. 2019;380(9):850-7.
2. Organization WH. Responding to intimate partner violence and sexual violence against women: WHO clinical and policy guidelines: World Health Organization; 2013.
3. Feder G, Ramsay J, Dunne D, Rose M, Arsene C, Norman R, et al. How far does screening women for domestic (partner) violence in different health-care settings meet criteria for a screening programme? Systematic reviews of nine UK National Screening Committee criteria. 2009.
4. García-Moreno C, Pallitto C, Devries K, Stöckl H, Watts C, Abrahams N. Global and regional estimates of violence against women: prevalence and health effects of intimate partner violence and non-partner sexual violence: World Health Organization; 2013.
5. Organization WH. Global and regional estimates of violence against women: prevalence and health effects of intimate partner violence and non-partner sexual violence: World Health Organization; 2013.
6. Garcia-Moreno C, Jansen HA, Ellsberg M, Heise L, Watts CH. Prevalence of intimate partner violence: findings from the WHO multi-country study on women's health and domestic violence. *The lancet*. 2006;368(9543):1260-9.
7. Chernet AG, Cherie KT. Prevalence of intimate partner violence against women and associated factors in Ethiopia. *BMC women's health*. 2020;20(1):22.
8. Dixon L, Graham-Kevan N. Understanding the nature and etiology of intimate partner violence and implications for practice and policy. *Clinical psychology review*. 2011;31(7):1145-55.
9. Du Mont J, Forte T. Intimate partner violence among women with mental health-related activity limitations: a Canadian population based study. *BMC public health*. 2014;14(1):51.
10. Patra P, Prakash J, Patra B, Khanna P. Intimate partner violence: Wounds are deeper. *Indian journal of psychiatry*. 2018;60(4):494.
11. Dillon G, Hussain R, Loxton D, Rahman S. Mental and physical health and intimate partner violence against women: A review of the literature. *International journal of family medicine*. 2013;2013.
12. Vos T, Astbury J, Piers L, Magnus A, Heenan M, Stanley L, et al. Measuring the impact of intimate partner violence on the health of women in Victoria, Australia. *Bulletin of the World Health Organization*. 2006;84:739-44.
13. Bosch J, Weaver TL, Arnold LD, Clark EM. The impact of intimate partner violence on women's physical health: Findings from the Missouri behavioral risk factor surveillance system. *Journal of interpersonal violence*. 2017;32(22):3402-19.
14. Bonomi AE, Thompson RS, Anderson M, Reid RJ, Carrell D, Dimer JA, et al. Intimate partner violence and women's physical, mental, and social functioning. *American journal of preventive medicine*. 2006;30(6):458-66.

15. Devries KM, Mak JY, Bacchus LJ, Child JC, Falder G, Petzold M, et al. Intimate partner violence and incident depressive symptoms and suicide attempts: a systematic review of longitudinal studies. *PLoS medicine*. 2013;10(5).
16. Coker AL, Davis KE, Arias I, Desai S, Sanderson M, Brandt HM, et al. Physical and mental health effects of intimate partner violence for men and women. *American journal of preventive medicine*. 2002;23(4):260-8.
17. Afifi TO, MacMillan H, Cox BJ, Asmundson GJ, Stein MB, Sareen J. Mental health correlates of intimate partner violence in marital relationships in a nationally representative sample of males and females. *Journal of interpersonal violence*. 2009;24(8):1398-417.
18. Deyessa N, Berhane Y, Alem A, Ellsberg M, Emmelin M, Hogberg U, et al. Intimate partner violence and depression among women in rural Ethiopia: a cross-sectional study. *Clinical practice and epidemiology in mental health*. 2009;5(1):8.
19. Hegarty K, Gunn J, Chondros P, Small R. Association between depression and abuse by partners of women attending general practice: descriptive, cross sectional survey. *Bmj*. 2004;328(7440):621-4.
20. Leung W-C, Kung F, Lam J, Leung T, Ho P. Domestic violence and postnatal depression in a Chinese community. *International Journal of Gynecology & Obstetrics*. 2002;79(2):159-66.
21. Division UNS. country profile | Ethiopia - UNdata 2016 [Available from: <https://data.un.org/CountryProfile.aspx/Images/CountryProfile.aspx?crName=Ethiopia>].
22. Tsigebrhan R, Shibre T, Medhin G, Fekadu A, Hanlon C. Violence and violent victimization in people with severe mental illness in a rural low-income country setting: a comparative cross-sectional community study. *Schizophrenia research*. 2014;152(1):275-82.
23. Saidi Kapiga SH, Abdul Khalie Muhammad, Heidi Stöckl, Gerry Mshana, Ramadhan Hashim,, Christian Hansen SL, Charlotte Watts. Prevalence of intimate partner violence and abuse and associated factors among women enrolled into a cluster randomised trial in northwestern Tanzania  
BMC public health. 2017.
24. Tegbar Yigzaw AY, Yigzaw Kebede. Domestic violence around Gondar in Northwest Ethiopia  
*Ethiopian journal of Health development* 2004;18(3):133-9.
25. Oram S, Trevillion K, Feder G, Howard L. Prevalence of experiences of domestic violence among psychiatric patients: systematic review. *The British Journal of Psychiatry*. 2013;202(2):94-9.
26. Khalifeh H, Oram S, Trevillion K, Johnson S, Howard LM. Recent intimate partner violence among people with chronic mental illness: findings from a national cross-sectional survey. *The British Journal of Psychiatry*. 2015;207(3):207-12.
27. González Cases J, Polo Usaola C, González Aguado F, López Gironés M, Rullas Trincado M, Fernández Liria A. Prevalence and Characteristics of Intimate Partner Violence Against Women with Severe Mental Illness: A Prevalence Study in Spain. *Community Mental Health Journal*. 2014;50(7):841-7.
28. Ali AA, Yassin K, Omer R. Domestic violence against women in Eastern Sudan. *BMC public health*. 2014;14(1):1136.
29. Ali TS, Asad N, Mogren I, Krantz G. Intimate partner violence in urban Pakistan: prevalence, frequency, and risk factors. *International journal of women's health*. 2011;3:105.
30. McCleary-Sills J, Namy S, Nyoni J, Rweyemamu D, Salvatory A, Steven E. Stigma, shame and women's limited agency in help-seeking for intimate partner violence. *Global public health*. 2016;11(1-2):224-35.
31. Metheny N, Stephenson R. Help Seeking Behavior among Women Who Report Intimate Partner Violence in Afghanistan: an Analysis of the 2015 Afghanistan Demographic and Health Survey. *Journal of Family Violence*. 2019;34(2):69-79.

- 1  
2  
3 32. Stöckl H PB. Intimate partner violence and its association with physical and mental health  
4 symptoms among older women in Germany. *Journal of Interpersonal Violence*. 2015;30(30):89-111.  
5 33. Trevillion K, Oram S, Feder G, Howard LM. Experiences of domestic violence and mental  
6 disorders: a systematic review and meta-analysis. *PloS one*. 2012;7(12).  
7 34. Cools S, Kotsadam A. Resources and intimate partner violence in Sub-Saharan Africa. *World  
8 Development*. 2017;95:211-30.  
9 35. Khan S, Klasen S. Female employment and Spousal abuse: A parallel cross-country analysis of  
10 developing countries. *Discussion Papers*; 2018.  
11  
12

13 1. Figure 1. Sampling schedule of the selection of women included in the study  
14  
15  
16  
17  
18  
19  
20  
21  
22  
23  
24  
25  
26  
27  
28  
29  
30  
31  
32  
33  
34  
35  
36  
37  
38  
39  
40  
41  
42  
43  
44  
45  
46  
47  
48  
49  
50  
51  
52  
53  
54  
55  
56  
57  
58  
59  
60

For peer review only

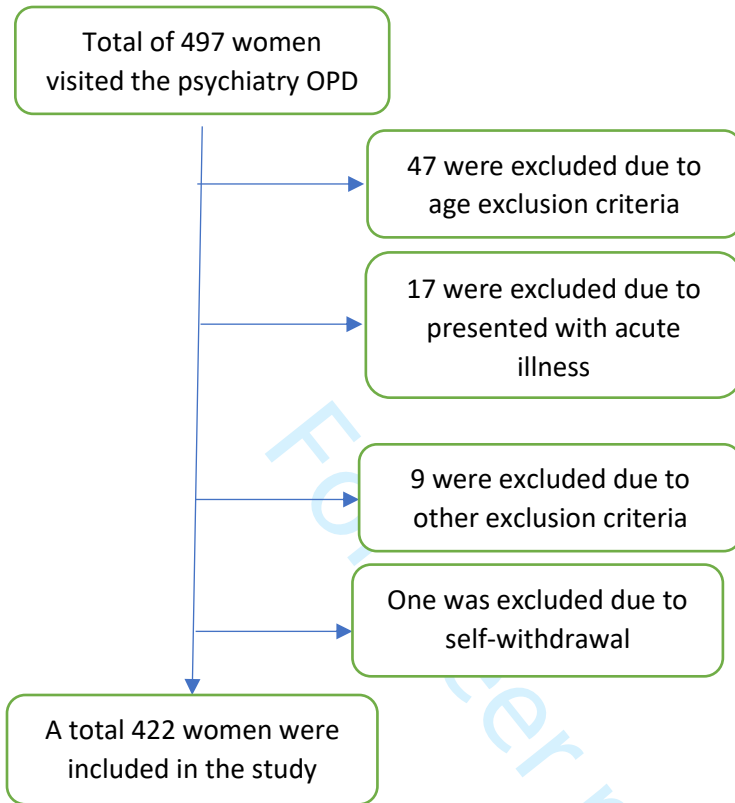

Figure 1 Sampling schedule of the selection of women included in the study

# Reporting checklist for cross sectional study.

Based on the STROBE cross sectional guidelines.

## Instructions to authors

Complete this checklist by entering the page numbers from your manuscript where readers will find each of the items listed below.

Your article may not currently address all the items on the checklist. Please modify your text to include the missing information. If you are certain that an item does not apply, please write "n/a" and provide a short explanation.

Upload your completed checklist as an extra file when you submit to a journal.

In your methods section, say that you used the STROBE cross sectional reporting guidelines, and cite them as:

von Elm E, Altman DG, Egger M, Pocock SJ, Gotsche PC, Vandenbroucke JP. The Strengthening the Reporting of Observational Studies in Epidemiology (STROBE) Statement: guidelines for reporting observational studies.

|                           |                                                                                                        | Page   |
|---------------------------|--------------------------------------------------------------------------------------------------------|--------|
|                           | Reporting Item                                                                                         | Number |
| <b>Title and abstract</b> |                                                                                                        |        |
| Title                     | <a href="#">#1a</a> Indicate the study's design with a commonly used term in the title or the abstract | 1      |

|    |                      |                     |                                                                 |   |
|----|----------------------|---------------------|-----------------------------------------------------------------|---|
| 1  | Abstract             | <a href="#">#1b</a> | Provide in the abstract an informative and balanced             | 2 |
| 2  |                      |                     |                                                                 |   |
| 3  |                      |                     | summary of what was done and what was found                     |   |
| 4  |                      |                     |                                                                 |   |
| 5  |                      |                     |                                                                 |   |
| 6  | <b>Introduction</b>  |                     |                                                                 |   |
| 7  |                      |                     |                                                                 |   |
| 8  |                      |                     |                                                                 |   |
| 9  | Background /         | <a href="#">#2</a>  | Explain the scientific background and rationale for the         | 3 |
| 10 | rationale            |                     | investigation being reported                                    |   |
| 11 |                      |                     |                                                                 |   |
| 12 |                      |                     |                                                                 |   |
| 13 |                      |                     |                                                                 |   |
| 14 | Objectives           | <a href="#">#3</a>  | State specific objectives, including any prespecified           | 4 |
| 15 |                      |                     | hypotheses                                                      |   |
| 16 |                      |                     |                                                                 |   |
| 17 |                      |                     |                                                                 |   |
| 18 |                      |                     |                                                                 |   |
| 19 |                      |                     |                                                                 |   |
| 20 | <b>Methods</b>       |                     |                                                                 |   |
| 21 |                      |                     |                                                                 |   |
| 22 |                      |                     |                                                                 |   |
| 23 | Study design         | <a href="#">#4</a>  | Present key elements of study design early in the paper         | 5 |
| 24 |                      |                     |                                                                 |   |
| 25 |                      |                     |                                                                 |   |
| 26 | Setting              | <a href="#">#5</a>  | Describe the setting, locations, and relevant dates, including  | 5 |
| 27 |                      |                     | periods of recruitment, exposure, follow-up, and data           |   |
| 28 |                      |                     | collection                                                      |   |
| 29 |                      |                     |                                                                 |   |
| 30 |                      |                     |                                                                 |   |
| 31 | Eligibility criteria | <a href="#">#6a</a> | Give the eligibility criteria, and the sources and methods of   |   |
| 32 |                      |                     | selection of participants.                                      |   |
| 33 |                      |                     |                                                                 |   |
| 34 |                      |                     |                                                                 |   |
| 35 |                      |                     |                                                                 |   |
| 36 |                      |                     |                                                                 |   |
| 37 |                      |                     |                                                                 |   |
| 38 |                      |                     |                                                                 |   |
| 39 |                      |                     |                                                                 |   |
| 40 |                      | <a href="#">#7</a>  | Clearly define all outcomes, exposures, predictors, potential   |   |
| 41 |                      |                     | confounders, and effect modifiers. Give diagnostic criteria, if |   |
| 42 |                      |                     | applicable                                                      |   |
| 43 |                      |                     |                                                                 |   |
| 44 |                      |                     |                                                                 |   |
| 45 |                      |                     |                                                                 |   |
| 46 |                      |                     |                                                                 |   |
| 47 | Data sources /       | <a href="#">#8</a>  | For each variable of interest give sources of data and details  | 6 |
| 48 | measurement          |                     | of methods of assessment (measurement). Describe                |   |
| 49 |                      |                     | comparability of assessment methods if there is more than       |   |
| 50 |                      |                     | one group. Give information separately for for exposed and      |   |
| 51 |                      |                     | unexposed groups if applicable.                                 |   |
| 52 |                      |                     |                                                                 |   |
| 53 |                      |                     |                                                                 |   |
| 54 |                      |                     |                                                                 |   |
| 55 |                      |                     |                                                                 |   |
| 56 |                      |                     |                                                                 |   |
| 57 |                      |                     |                                                                 |   |
| 58 |                      |                     |                                                                 |   |
| 59 |                      |                     |                                                                 |   |
| 60 |                      |                     |                                                                 |   |



|    |                |                      |                                                               |     |
|----|----------------|----------------------|---------------------------------------------------------------|-----|
| 1  | Bias           | <a href="#">#9</a>   | Describe any efforts to address potential sources of bias     | 5,6 |
| 2  |                |                      |                                                               |     |
| 3  |                |                      |                                                               |     |
| 4  | Study size     | <a href="#">#10</a>  | Explain how the study size was arrived at                     | 5   |
| 5  |                |                      |                                                               |     |
| 6  |                |                      |                                                               |     |
| 7  | Quantitative   | <a href="#">#11</a>  | Explain how quantitative variables were handled in the        | 6,7 |
| 8  | variables      |                      | analyses. If applicable, describe which groupings were        |     |
| 9  |                |                      | chosen, and why                                               |     |
| 10 |                |                      |                                                               |     |
| 11 |                |                      |                                                               |     |
| 12 |                |                      |                                                               |     |
| 13 |                |                      |                                                               |     |
| 14 |                |                      |                                                               |     |
| 15 | Statistical    | <a href="#">#12a</a> | Describe all statistical methods, including those used to     | 6,7 |
| 16 | methods        |                      | control for confounding                                       |     |
| 17 |                |                      |                                                               |     |
| 18 |                |                      |                                                               |     |
| 19 |                |                      |                                                               |     |
| 20 | Statistical    | <a href="#">#12b</a> | Describe any methods used to examine subgroups and            | 6,7 |
| 21 | methods        |                      | interactions                                                  |     |
| 22 |                |                      |                                                               |     |
| 23 |                |                      |                                                               |     |
| 24 |                |                      |                                                               |     |
| 25 |                |                      |                                                               |     |
| 26 | Statistical    | <a href="#">#12c</a> | Explain how missing data were addressed                       | N/A |
| 27 | methods        |                      |                                                               |     |
| 28 |                |                      |                                                               |     |
| 29 |                |                      |                                                               |     |
| 30 |                |                      |                                                               |     |
| 31 | Statistical    | <a href="#">#12d</a> | If applicable, describe analytical methods taking account of  | N/A |
| 32 | methods        |                      | sampling strategy                                             |     |
| 33 |                |                      |                                                               |     |
| 34 |                |                      |                                                               |     |
| 35 |                |                      |                                                               |     |
| 36 | Statistical    | <a href="#">#12e</a> | Describe any sensitivity analyses                             | N/A |
| 37 | methods        |                      |                                                               |     |
| 38 |                |                      |                                                               |     |
| 39 |                |                      |                                                               |     |
| 40 |                |                      |                                                               |     |
| 41 |                |                      |                                                               |     |
| 42 | <b>Results</b> |                      |                                                               |     |
| 43 |                |                      |                                                               |     |
| 44 |                |                      |                                                               |     |
| 45 | Participants   | <a href="#">#13a</a> | Report numbers of individuals at each stage of study—eg       | 7   |
| 46 |                |                      | numbers potentially eligible, examined for eligibility,       |     |
| 47 |                |                      | confirmed eligible, included in the study, completing follow- |     |
| 48 |                |                      | up, and analysed. Give information separately for for         |     |
| 49 |                |                      | exposed and unexposed groups if applicable.                   |     |
| 50 |                |                      |                                                               |     |
| 51 |                |                      |                                                               |     |
| 52 |                |                      |                                                               |     |
| 53 |                |                      |                                                               |     |
| 54 |                |                      |                                                               |     |
| 55 |                |                      |                                                               |     |
| 56 |                |                      |                                                               |     |
| 57 | Participants   | <a href="#">#13b</a> | Give reasons for non-participation at each stage              | N/A |
| 58 |                |                      |                                                               |     |
| 59 |                |                      |                                                               |     |
| 60 |                |                      |                                                               |     |

|    |                   |                      |                                                                   |          |
|----|-------------------|----------------------|-------------------------------------------------------------------|----------|
| 1  | Participants      | <a href="#">#13c</a> | Consider use of a flow diagram                                    |          |
| 2  |                   |                      |                                                                   |          |
| 3  |                   |                      |                                                                   |          |
| 4  | Descriptive data  | <a href="#">#14a</a> | Give characteristics of study participants (eg demographic,       | 7,8      |
| 5  |                   |                      | clinical, social) and information on exposures and potential      |          |
| 6  |                   |                      | confounders. Give information separately for exposed and          |          |
| 7  |                   |                      | unexposed groups if applicable.                                   |          |
| 8  |                   |                      |                                                                   |          |
| 9  |                   |                      |                                                                   |          |
| 10 |                   |                      |                                                                   |          |
| 11 |                   |                      |                                                                   |          |
| 12 |                   |                      |                                                                   |          |
| 13 |                   |                      |                                                                   |          |
| 14 | Descriptive data  | <a href="#">#14b</a> | Indicate number of participants with missing data for each        | N/A      |
| 15 |                   |                      | variable of interest                                              |          |
| 16 |                   |                      |                                                                   |          |
| 17 |                   |                      |                                                                   |          |
| 18 |                   |                      |                                                                   |          |
| 19 | Outcome data      | <a href="#">#15</a>  | Report numbers of outcome events or summary measures.             | 10,11,12 |
| 20 |                   |                      | Give information separately for exposed and unexposed             |          |
| 21 |                   |                      | groups if applicable.                                             |          |
| 22 |                   |                      |                                                                   |          |
| 23 |                   |                      |                                                                   |          |
| 24 |                   |                      |                                                                   |          |
| 25 |                   |                      |                                                                   |          |
| 26 |                   |                      |                                                                   |          |
| 27 | Main results      | <a href="#">#16a</a> | Give unadjusted estimates and, if applicable, confounder-         | 9,10     |
| 28 |                   |                      | adjusted estimates and their precision (eg, 95% confidence        |          |
| 29 |                   |                      | interval). Make clear which confounders were adjusted for         |          |
| 30 |                   |                      | and why they were included                                        |          |
| 31 |                   |                      |                                                                   |          |
| 32 |                   |                      |                                                                   |          |
| 33 |                   |                      |                                                                   |          |
| 34 |                   |                      |                                                                   |          |
| 35 |                   |                      |                                                                   |          |
| 36 |                   |                      |                                                                   |          |
| 37 | Main results      | <a href="#">#16b</a> | Report category boundaries when continuous variables were         | N/A      |
| 38 |                   |                      | categorized                                                       |          |
| 39 |                   |                      |                                                                   |          |
| 40 |                   |                      |                                                                   |          |
| 41 |                   |                      |                                                                   |          |
| 42 | Main results      | <a href="#">#16c</a> | If relevant, consider translating estimates of relative risk into | N/A      |
| 43 |                   |                      | absolute risk for a meaningful time period                        |          |
| 44 |                   |                      |                                                                   |          |
| 45 |                   |                      |                                                                   |          |
| 46 |                   |                      |                                                                   |          |
| 47 |                   |                      |                                                                   |          |
| 48 | Other analyses    | <a href="#">#17</a>  | Report other analyses done—e.g., analyses of subgroups            | 11,12    |
| 49 |                   |                      | and interactions, and sensitivity analyses                        |          |
| 50 |                   |                      |                                                                   |          |
| 51 |                   |                      |                                                                   |          |
| 52 |                   |                      |                                                                   |          |
| 53 | <b>Discussion</b> |                      |                                                                   |          |
| 54 |                   |                      |                                                                   |          |
| 55 |                   |                      |                                                                   |          |
| 56 | Key results       | <a href="#">#18</a>  | Summarise key results with reference to study objectives          | 12       |
| 57 |                   |                      |                                                                   |          |
| 58 |                   |                      |                                                                   |          |
| 59 |                   |                      |                                                                   |          |
| 60 |                   |                      |                                                                   |          |

|    |                          |                     |                                                                |    |
|----|--------------------------|---------------------|----------------------------------------------------------------|----|
| 1  | Limitations              | <a href="#">#19</a> | Discuss limitations of the study, taking into account sources  | 24 |
| 2  |                          |                     | of potential bias or imprecision. Discuss both direction and   |    |
| 3  |                          |                     | magnitude of any potential bias.                               |    |
| 4  |                          |                     |                                                                |    |
| 5  |                          |                     |                                                                |    |
| 6  |                          |                     |                                                                |    |
| 7  |                          |                     |                                                                |    |
| 8  |                          |                     |                                                                |    |
| 9  | Interpretation           | <a href="#">#20</a> | Give a cautious overall interpretation considering objectives, | 24 |
| 10 |                          |                     | limitations, multiplicity of analyses, results from similar    |    |
| 11 |                          |                     | studies, and other relevant evidence.                          |    |
| 12 |                          |                     |                                                                |    |
| 13 |                          |                     |                                                                |    |
| 14 |                          |                     |                                                                |    |
| 15 |                          |                     |                                                                |    |
| 16 | Generalisability         | <a href="#">#21</a> | Discuss the generalisability (external validity) of the study  | 2  |
| 17 |                          |                     | results                                                        |    |
| 18 |                          |                     |                                                                |    |
| 19 |                          |                     |                                                                |    |
| 20 |                          |                     |                                                                |    |
| 21 |                          |                     |                                                                |    |
| 22 | <b>Other Information</b> |                     |                                                                |    |
| 23 |                          |                     |                                                                |    |
| 24 |                          |                     |                                                                |    |
| 25 | Funding                  | <a href="#">#22</a> | Give the source of funding and the role of the funders for the | 15 |
| 26 |                          |                     | present study and, if applicable, for the original study on    |    |
| 27 |                          |                     | which the present article is based                             |    |
| 28 |                          |                     |                                                                |    |
| 29 |                          |                     |                                                                |    |
| 30 |                          |                     |                                                                |    |
| 31 |                          |                     |                                                                |    |
| 32 |                          |                     |                                                                |    |

33 None The STROBE checklist is distributed under the terms of the Creative Commons Attribution  
34 License CC-BY. This checklist can be completed online using <https://www.goodreports.org/>, a tool  
35 made by the [EQUATOR Network](#) in collaboration with [Penelope.ai](#)  
36  
37  
38  
39  
40  
41  
42  
43  
44  
45  
46  
47  
48  
49  
50  
51  
52  
53  
54  
55  
56  
57  
58  
59  
60
